# Supplementary material for: The impact of the 2011 Great East Japan Earthquake on hospitalisation for respiratory disease in a rapidly aging society: a retrospective descriptive and cross-sectional study at the disaster base hospital in Ishinomaki
Source: PubMed Central journal article supplement — BMJ Open. 2013 Jan 3;3(1):e000865. doi: 10.1136/bmjopen-2012-000865 (PMC3549258; doi:10.1136/bmjopen-2012-000865), 2013-01-03
Supplement: bmjopen-2012-000865.draft_revisions.pdf [file bmjopen-2012-000865.draft_revisions.pdf]

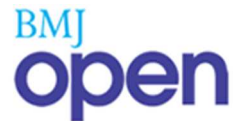

**The impact of the 2011 Great East Japan Earthquake on hospitalization for respiratory disease in advanced aging society: a retrospective descriptive and cross-sectional study at the disaster base hospital in Ishinomaki**

|                                 |                                                                                                                                                                                                                                                                                                                                                                                                                                                                                                                                                                                                                                                                                                                 |
|---------------------------------|-----------------------------------------------------------------------------------------------------------------------------------------------------------------------------------------------------------------------------------------------------------------------------------------------------------------------------------------------------------------------------------------------------------------------------------------------------------------------------------------------------------------------------------------------------------------------------------------------------------------------------------------------------------------------------------------------------------------|
| Journal:                        | <i>BMJ Open</i>                                                                                                                                                                                                                                                                                                                                                                                                                                                                                                                                                                                                                                                                                                 |
| Manuscript ID:                  | bmjopen-2012-000865                                                                                                                                                                                                                                                                                                                                                                                                                                                                                                                                                                                                                                                                                             |
| Article Type:                   | Research                                                                                                                                                                                                                                                                                                                                                                                                                                                                                                                                                                                                                                                                                                        |
| Date Submitted by the Author:   | 20-Jan-2012                                                                                                                                                                                                                                                                                                                                                                                                                                                                                                                                                                                                                                                                                                     |
| Complete List of Authors:       | Yamanda, Shinsuke; Japanese Red Cross Ishinomaki Hospital, Respiratory Medicine<br>Hanagama, Masakazu; Japanese Red Cross Ishinomaki Hospital, Department of respiratory medicine<br>Kobayashi, Seiichi; Japanese Red Cross Ishinomaki Hospital, Department of respiratory medicine<br>Satou, Hikari; Japanese Red Cross Ishinomaki Hospital, Department of respiratory medicine<br>Tokuda, Shinsaku; Kobe University Graduate School of Medicine, Division of Cell Biology<br>Niu, Kaijun; Tohoku University Graduate School of Biomedical Engineering, Division of Biomedical Engineering for Health and Welfare<br>Yanai, Masaru; Japanese Red Cross Ishinomaki Hospital, Department of respiratory medicine |
| <b>Primary Subject Heading</b>: | Respiratory medicine                                                                                                                                                                                                                                                                                                                                                                                                                                                                                                                                                                                                                                                                                            |
| Secondary Subject Heading:      | Geriatric medicine, Emergency medicine                                                                                                                                                                                                                                                                                                                                                                                                                                                                                                                                                                                                                                                                          |
| Keywords:                       | GERIATRIC MEDICINE, Adult thoracic medicine < THORACIC MEDICINE, ACCIDENT & EMERGENCY MEDICINE                                                                                                                                                                                                                                                                                                                                                                                                                                                                                                                                                                                                                  |
|                                 |                                                                                                                                                                                                                                                                                                                                                                                                                                                                                                                                                                                                                                                                                                                 |

SCHOLARONE™  
Manuscripts

**Title**

The impact of the 2011 Great East Japan Earthquake on hospitalization for respiratory disease in advanced aging society: a retrospective descriptive and cross-sectional study at the disaster base hospital in Ishinomaki

**Author names**

Shinsuke Yamanda *physician scientist*<sup>1</sup>, Masakazu Hanagama *physician scientist*<sup>1</sup>, Seiichi Kobayashi *senior physician scientist*<sup>1</sup>, Hikari Satou *resident*<sup>1</sup>, Shinsaku Tokuda *lecturer*<sup>2</sup>, Kaijun Niu *associate professor*<sup>3</sup>, Masaru Yanai *director*<sup>1</sup>

<sup>1</sup>Department of respiratory medicine, Japanese Red Cross Ishinomaki Hospital, 71 Hebita Aza Nishimichishita, Ishinomaki, Miyagi, Japan

<sup>2</sup>Division of Cell Biology, Kobe University Graduate School of Medicine, 7-5-1 Kusunoki-cho, chuo-ku, Kobe, Hyogo, Japan

<sup>3</sup>Division of Biomedical Engineering for Health and Welfare, Tohoku University Graduate School of Biomedical Engineering, 2-1 Seiryō-machi, Aoba-ku, Sendai, Miyagi, Japan

**Correspondence to:** Shinsuke Yamanda [syamanda@gmail.com](mailto:syamanda@gmail.com)

**Article summary****Article focus**

The Great East Japan Earthquake attacked one of the most advanced aging societies in the world. Respiratory medicine is the major field in gerontology. Here we address how seriously the disaster affected respiratory diseases in the most heavily stricken area, which has one of the highest ratios of elderly people in Japan.

The study gives lessons against natural disasters and aging society.

**Key messages**

After the earthquake and tsunami, admission from pneumonia and exacerbation of chronic respiratory disease in elderly increased.

Harsh conditions and poor ADL after the disaster may be associated with increase in hospitalization for respiratory diseases in elderly people.

**Strengths and limitations of study**

We could obtain detailed data of patient even in catastrophic state.

We analyzed only hospitalized patients. But there were a great number of outpatients as well as heavy loss of lives.

**Abstract****Objective**

To investigate the impact of the 2011 Great East Japan earthquake on hospitalization for respiratory disease at the disaster base hospital in aging society.

**Design**

Descriptive and cross sectional study.

**Setting**

Emergency care in Japanese Red Cross Ishinomaki Hospital, a regional disaster base hospital, Miyagi, Japan.

**Participants**

322 emergency patients who hospitalized for respiratory disease from March 11 to May 9 in 2011, and 204 emergency patients who hospitalized in the corresponding time period of 2009 and 2010.

**Main outcome measures**

Description and comparison of patient's characteristics and disease distribution in terms of age, time after the disaster, and activity of daily living (ADL).

**Results**

Totally 1,769 patients admitted to our hospital, and 322 of them were hospitalized for respiratory disease during the first 60 days after the earthquake. Mean age of patient was  $75.7 \pm 12.5$  years old. Pneumonia was the most frequent disease ( $n=190$ , 59.0%), followed by acute exacerbation of chronic obstructive disease (AE-COPD) ( $n=53$ , 16.5%), attack of asthma ( $n=27$ , 8.4%), and progression of lung cancer ( $n=22$ , 6.8%). Compared with the corresponding period of 2009 or 2010, increase in absolute number of hospitalization was the highest for pneumonia, followed by AE-COPD and attack of asthma. Elderly patients were more likely hospitalized after the earthquake, especially for pneumonia and AE-COPD. At hospitalization, 195 patients were "dependent" and 54 patients were "partially dependent". Deterioration of ADL was more frequent in elderly and female patients. The mean age was  $73.1 \pm 11.2$  years old in the patients with deterioration of ADL and  $69.9 \pm 15.1$  in the patients without deterioration of ADL. The male proportion was 60.6% in the patients with deterioration of ADL and 70% in the patients without deterioration of ADL.

**Conclusions**

After Great East Japan Earthquake, admission for pneumonia and exacerbation of chronic respiratory disease in elderly increased at the disaster base hospital.

**Introduction**

On March 11, 2011, at 2:46 pm Japan time, the Pacific coast of Japan's Tohoku (northeastern)

1  
2  
3  
4  
5 region was struck by the massive earthquake (The Great East Japan Earthquake), measuring  
6 magnitude 9.0 on the Richter scale<sup>1</sup>. The earthquake triggered a devastating tsunami which  
7 destroyed many towns and villages near the seashore. The epicenter was estimated to be about  
8 70 kilometers east of Oshika Peninsula of Ishinomaki in Miyagi. Officially, over 19,000 people  
9 were killed or missing and the maximum number of refugees reached more than 550,000<sup>2</sup>.

10  
11  
12  
13  
14  
15  
16  
17  
18  
19  
20  
21  
22  
23  
24  
25  
26  
27  
28  
29  
30  
31  
32  
33  
34  
35  
36  
37  
38  
39  
40  
41  
42  
43  
44  
45  
46  
47  
48  
49  
50  
51  
52  
53  
54  
55  
56  
57  
58  
59  
60  
Ishinomaki city, located in Pacific coast of Honshu Island, suffered from the largest number of  
victims in Japan, 3,280 people were killed and 669 people were still missing. A great number of  
casualties, more than 10,000 patients in the first 30 days, were treated at Japanese Red Cross  
Ishinomaki Hospital, a regional disaster base hospital in Ishinomaki which uniquely preserved  
its hospital function in Ishinomaki region.

Japan is one of the most advanced aging society in the world. 23% of Japanese citizens were 65  
years old or more in 2010<sup>3</sup>. Especially, Tohoku region is a highly advanced aging society in  
Japan, 26.6% of people living in Ishinomaki city were 65 years old or more in 2011. Although  
several reports showed the significant association between age and earthquake and tsunami  
death<sup>4-8</sup>, there were few reports investigating the impact of a tremendous disaster on such an  
aging society<sup>9 10</sup>.

Respiratory diseases are common in elderly people even in ordinary times. So, investigating the  
impact of the disasters on respiratory health will contribute to elucidating the problem of aging  
society. Thus, we performed retrospective descriptive and cross-sectional analysis of the  
medical and epidemiologic data of the patient requiring hospitalization for respiratory disease  
after the Great East Japan Earthquake and following tsunami.

## Methods

This study was a retrospective descriptive and cross-sectional analysis of the data obtained from  
the medical records at Japanese Red Cross Ishinomaki Hospital. We reviewed medical records  
of patients admitted to the hospital for respiratory diseases during the first 60 days after the  
Great East Japan Earthquake, when the hospital solely accepted emergency patients. We also  
reviewed medical records of patients who required unscheduled hospitalization for respiratory  
disease in the corresponding period of 2009 and 2010.

Japanese Red Cross Ishinomaki Hospital which had 402 beds for inpatients was located at 4.5  
km inland from Pacific Ocean. It has covered about 220,000 people living in its medical zone  
(Ishinomaki, Onagawa, or Higashi-matsushima) and assigned to a regional disaster base hospital.  
It has received almost all of the emergency respiratory patients even in ordinary time, because it  
is the unique hospital having the respiratory department and pulmonary specialists in the region.  
Medical records were investigated in terms of date of admission, age, sex, diagnosis. We also  
investigated activity of daily living (ADL) at hospitalization and ADL before earthquake, and

1  
2  
3  
4  
5 their residence before admission on the medical record of 2011 study period. For comparison,  
6 the total number of unscheduled hospitalization to the hospital during the corresponding periods  
7 in 2009 and 2010 was counted.

8  
9  
10 Pneumonia was defined as the presence of the infiltration on chest radiograph along with one or  
11 more of the following symptoms or signs: fever, cough, sputum production, breathlessness,  
12 pleuritic chest pain or signs consistent with pneumonia on auscultation.

13  
14 Chronic obstructive pulmonary disease (COPD) and bronchial asthma were detected by the  
15 previous spirometric data, patient's self-report, or physician's diagnosis made by patient's  
16 history, physical examination, and radiological finding. An acute exacerbation of  
17 COPD(AE-COPD) was defined as an increase in or new onset of more than one symptom of  
18 COPD (cough, sputum, wheezing, dyspnea or chest tightness) without pneumonia or  
19 pneumothorax. An attack of asthma was defined as the presentation of wheezes or severe cough  
20 in asthma patients without pneumonia. Progression of lung cancer was defined as requirement  
21 for admission for lung cancer associated condition such as dehydration, respiratory failure, or  
22 uncontrolled pain. Obstructive pneumonia due to lung cancer was considered as progression of  
23 lung cancer. Chest trauma and traumatopnea were not considered as respiratory disease but  
24 chest injury.

25  
26 ADL was assessed by the information from a patient, patient's family, or patient's caregiver, and  
27 classified into three categories; "independent" who could live without particular support,  
28 "partially dependent" who could not leave their residence without any support, "dependent"  
29 who spent a day on the bed or the chair and lost the ability to move for themselves. Furthermore,  
30 we defined as "originally dependent" who were dependent or partially dependent before the  
31 disaster, and as "newly dependent" who became dependent or partially dependent after the  
32 disaster.

#### 33 34 35 36 37 38 39 40 41 42 Data analysis

43 All data were entered into a personal computer and analyzed using Microsoft™ Excel software  
44 and statistical analysis was performed using JMP9 (SAS Institute Inc., Cary, NC, USA). A  
45 missing value in medical record was treated as "unknown". Results were given as mean ± SD  
46 for numerical variables and as proportions for categorical variables. To analyze sequential  
47 change of the effect of the disaster, we divided 60 days of study period into six groups of each  
48 ten days. To investigate the risk of hospitalization for respiratory disease after the earthquake  
49 and tsunami, we compared the patient's characteristics of 2011 study period with that of 2010  
50 and 2009 corresponding period as ordinary time. We used two-sided Student's *t*-test for  
51 numerical variables and chi-square test for the categorical variables. We calculated the effect of  
52 age and sex on the odds ratio for hospitalization for respiratory disease after the earthquake by  
53  
54  
55  
56  
57  
58  
59  
60

logistic regression models. The  $p < 0.05$  is accepted as statistically significant.

## Result

All of the scheduled hospitalization was cancelled and emergency admission was solely accepted during the first 60 day after the earthquake at Japanese Red Cross Ishinomaki Hospital. 1,769 patients admitted to the hospital, and 322 of them were hospitalized for respiratory disease during the study period. Patients hospitalized for respiratory disease accounted for 18.2% of total hospitalization during the study period. This proportion was higher than the corresponding period of past two years, 10.2% of 2010 and 11.6% of 2009. While the number of total hospitalizations of this period in 2011 was about twice of that in 2009 and 2010, hospitalization for respiratory disease in 2011 reached about three times or more than that of 2009 and 2010. The total number of hospitalizations was at peak in the first ten days and then decreased, but the number of hospitalization for respiratory disease kept increasing for 20 days (Figure 1A and B).

We compared the disease distribution between 2011, 2010, and 2009 (Figure 2). Pneumonia was the most frequent disease ( $n=190$ , 59.0%), followed by AE-COPD ( $n=53$ , 16.5%), attack of asthma ( $n=27$ , 8.4%), and progression of lung cancer ( $n=22$ , 6.8%). One case of AE-COPD and seven cases of attack of asthma were physician's diagnosis. Others included pneumothorax, restrictive thoracic disease, pleural effusion, influenza, drowning, primary pulmonary hypertension, requirement of mechanical ventilator support for neuromuscular disease, and so on. One patient diagnosed as pneumonia was complicated by attack of asthma and two patients of pneumonia exacerbated their symptom of COPD. They were treated for both conditions and counted as pneumonia. In comparison with the past two years, the increase in absolute number of hospitalizations was the largest for pneumonia, followed by AE-COPD and attack of asthma. The number of hospitalization for progression of lung cancer and that for other diseases were not so deferent from the past two years. 39.4% of patients stayed at emergency shelters before hospitalization..

To investigate the disease specific effect of earthquake, age and sex of each disease were compared between the study period in 2011 and the corresponding period in the past two years (Table 1). The mean age of patients hospitalized for respiratory disease was significantly higher in 2011 than in the past two years ( $75.7 \pm 12.5$  years old in 2011,  $73.2 \pm 13.4$  years old in 2010 and 2009.  $p=0.03$ ). Male proportion tended to be lower in 2011 than in the past two years (59.6% in 2011, 67.2% in 2010 and 2009.  $p=0.08$ ). Specifically, pneumonia patients and AE-COPD patients were significantly older in 2011 study period than in 2010 and 2009 corresponding

1  
2  
3  
4  
5 period( $p=0.03$  and  $p=0.03$ , respectively). Male population of AE-COPD was significantly higher,  
6 whereas that of attack of asthma significantly lower in 2011 period than 2010 and 2009  
7 periods( $p=0.01$  and  $p=0.03$ , respectively).  
8

9  
10 Furthermore, the effect of age and sex on the odds ratio for hospitalization with respiratory  
11 disease was calculated (Table 2). We found older patients were more likely hospitalized after the  
12 earthquake, especially for pneumonia and AE-COPD. Male patients were more likely  
13 hospitalized for AE-COPD and less likely hospitalized for attack of asthma.  
14

15  
16  
17 Actual numbers of hospitalization for the main respiratory diseases in terms of every ten days  
18 during the study period is shown in Figure 3. Pneumonia presented its peak in the second period.  
19 Following pneumonia, AE-COPD presented its peak in the third period and progression of lung  
20 cancer had its peak in the fifth period. Attack of asthma had small peak in the same third period  
21 as AECOPD.  
22  
23

24  
25  
26 Next, we investigated ADL at hospitalization and ADL before the disaster among the patients  
27 hospitalized in 2011 study period. Because of confusing situation of medical activities after the  
28 disaster, ADL before the disaster, ADL at hospitalization, and both ADL were not recorded in 8,  
29 1, and 2 patients, respectively. Six of them were hospitalized for pneumonia and remaining five  
30 patients were hospitalized for AE-COPD. At hospitalization, 195 patients were “dependent” and  
31 54 patients were “partially dependent”. Those patients accounted for 76.9 % of the patients  
32 hospitalized after the earthquake. On the other hand, before earthquake, only 86 patients were  
33 “dependent” and 51 patients were “partially dependent”. Those patients accounted for 42.5% of  
34 hospitalized patients after the earthquake. We analyze sequential change in the number of the  
35 patients who were “originally dependent”, “newly dependent”, or “independent” at  
36 hospitalization (Figure 4). Throughout the study period, majority of patients were dependent or  
37 partially dependent patient. Originally dependent patients were hospitalized especially in early  
38 period (first and second periods), and newly dependent patients showed its keen peak of  
39 hospitalization in the third period, the day from 21 to 30 after the earthquake, and kept high  
40 incidence of admission thereafter. Independent patients were hospitalized mainly during first  
41 20 days.  
42  
43  
44  
45  
46  
47  
48

49  
50 Table 3 showed the association of ADL category (independent, newly dependent, and originally  
51 dependent) with patient’s age, sex, and diagnosis. Regarding diagnosis, ratio of each disease  
52 was calculated in each category. Eleven patients whose ADL was not completely recorded were  
53 excluded from the data. Young and male patients were more frequent in order of independent,  
54 newly dependent and originally dependent. On investigation in patient’s diagnosis, the  
55  
56  
57  
58  
59  
60



1  
2  
3  
4  
5 proportion of pneumonia and progression of lung cancer increased in the same order, while the  
6 proportion of AE-COPD and asthma decreased.  
7  
8  
9

## 10 11 **Discussion**

### 12 **Summary**

13  
14 In this retrospective descriptive and cross-sectional study, we found substantial increase in  
15 elderly patients hospitalized for respiratory disease after the earthquake and tsunami. Pneumonia,  
16 AE-COPD, and attack of asthma were apparently increased after earthquake. Mean age of  
17 patients hospitalized for respiratory disease after the earthquake was significantly higher than  
18 that of ordinary years. Majority of patients had poor ADL and many of them experienced  
19 deterioration of ADL after the earthquake.  
20  
21

### 22 **Effect on respiratory disease**

23  
24 Previous reports on Hanshin-Awaji earthquake showed initial rush of patients with injury and  
25 following increase of patients with respiratory disease, especially pneumonia<sup>11-13</sup>. Similarly, our  
26 observation showed marked increase in pneumonia patients, although initial rush of heavy  
27 injury patients was absent in this disaster because majority of victims were drawn to death and  
28 heavily injured patients were seldom carried to the hospital.  
29

30  
31 The cause of increase in respiratory disease was different in each situation. After the 2004  
32 Sumatra-Andaman earthquake and following tsunami, the number of lower respiratory infection  
33 in Aceh was rapidly increased after the disaster and sharply declined in the second week<sup>14</sup>. On  
34 the other hand, after the 1995 Hanshin-Awaji earthquake, the number of patients hospitalized for  
35 pneumonia was gradually increased and kept high proportion over the two month<sup>9 10</sup>. This  
36 difference is ascribable to the mechanism of developing pneumonia. In Sumatra-Andaman  
37 earthquake, many of pneumonia were resulted from aspiration of tsunami-water in  
38 near-drowning events<sup>15 16</sup>. Those pneumonias were called “tsunami lung”. On the other hand, in  
39 the Hanshin-Awaji earthquake, many patients developed pneumonia in shelters under unhealthy  
40 environment and most of them were in elderly. Those pneumonias were called “shelter  
41 pneumonia”<sup>17</sup>. In this earthquake and tsunami, we experienced few number of pneumonia  
42 directly caused by aspiration of tsunami-water even in very acute period. Most patients came  
43 from their own or relative’s home, other hospital, nursing home, or shelter, and a few of the  
44 patient directory came from the field. The mean age of them was significantly higher than that  
45 of 2010 and 2009. Therefore, we thought most of pneumonia we treated was the same kind of  
46 “shelter pneumonia”.  
47  
48

49 AE-COPD was also remarkably increased. COPD was one of the most common chronic  
50 respiratory diseases, especially in elderly people. It is well known that interruption of treatment  
51  
52  
53  
54  
55  
56  
57  
58  
59  
60

1  
2  
3  
4  
5 for chronic disease will easily exacerbate patient's condition, and it is also true after a natural  
6 disaster<sup>14 18-20</sup>. Many patients lost their drugs by tsunami flooding, therefore, interruption of  
7 regular medication may partly account for the increase in hospitalization by AE-COPD. We  
8 also speculate that air pollution caused by tsunami dust may raise the hospitalization by  
9 AE-COPD. After cold and snowy weather for ten days from the disaster, cold, sunny, and  
10 windy days covered over Ishinomaki region, and dense dust containing tsunami sediment  
11 floated in the air for the following three weeks.

12  
13 Although asthma was also one of the most common chronic respiratory diseases and had the  
14 same precipitating cause with COPD, attack of asthma was not so much increased as AE-COPD.  
15 This difference might be caused by two important differences between asthma and COPD. First,  
16 generally, patients of COPD were older than those of asthma. Therefore, baseline health  
17 condition of patients of COPD would be poorer than that of asthma<sup>21</sup>. As a result, COPD  
18 patients required more frequent hospitalization. In our study, mean age of AE-COPD was higher  
19 than that of attack of asthma as well. Second, bacterial respiratory infection affects patients with  
20 COPD more than those with asthma<sup>22</sup>. In the aftermath of earthquake, loss of hygiene and  
21 overcrowding in the shelter could increase the risk of respiratory bacterial infection and cause  
22 AE-COPD.

23  
24 Lung cancer related hospitalization did not increase much and its ratio to total hospitalization  
25 for respiratory diseases rather declined. Mean age of lung cancer patients was similar to that in  
26 the past two years. Maeda et al. also reported that no increase in lung cancer related  
27 hospitalization was observed after Hanshin-Awaji earthquake<sup>23</sup>. Progression of lung cancer may  
28 not be influenced by environment as much as cancer growth itself. So, the disaster will not  
29 impact on lung cancer immediately. Although the interruption of chemotherapy and/or  
30 radiotherapy would worsen the prognosis, it cannot be confirmed during our study period.

#### 31 **Effect on ADL**

32  
33 Our observation demonstrated that drastic deterioration of ADL after the disaster resulted in  
34 increase in hospitalization by respiratory diseases. In acute phase, patients with poor ADL,  
35 especially originally dependent ones, were hospitalized for pulmonary diseases, typically  
36 pneumonia; although substantial number of good ADL patients was also hospitalized. After 3 or  
37 4 weeks, many people who deteriorated their ADL (newly dependent) were hospitalized for  
38 pulmonary diseases. It was reported that physical disability was an independent risk factor for  
39 death in Hanshin-Awaji earthquake and the 1999 Taiwan earthquake<sup>9 10</sup>. However, those reports  
40 investigated the mortality in acute phase, not hospitalization in subacute or chronic phase. After  
41 the earthquake and tsunami, one fourth of people in Ishinomaki region fled into shelters, many  
42 of which were also flooded by tsunami. They lacked water and food under harsh condition of  
43 cold season without heating in overcrowded room just letting them lie on the floor without beds.  
44  
45  
46  
47  
48  
49  
50  
51  
52  
53  
54  
55  
56  
57  
58  
59  
60

1  
2  
3  
4  
5  
6  
7  
8  
9  
10  
11  
12  
13  
14  
15  
16  
17  
18  
19  
20  
21  
22  
23  
24  
25  
26  
27  
28  
29  
30  
31  
32  
33  
34  
35  
36  
37  
38  
39  
40  
41  
42  
43  
44  
45  
46  
47  
48  
49  
50  
51  
52  
53  
54  
55  
56  
57  
58  
59  
60

In such bad condition, elderly people restricted their consumption food and water, and kept still in one space; as a result, they deteriorated their ADLs. In addition, scarcity of water worsened oral hygiene. Both poor functional status and oral hygiene were the major risk factor of pneumonia<sup>24-27</sup>, especially in elderly people. Subsequently, many elderly people were hospitalized for “shelter pneumonia” after the earthquake. Also, poor oral hygiene induces swallowing dysfunction<sup>28</sup> and swallowing dysfunction could be a risk factor of exacerbation of COPD<sup>29</sup>. It would be one of the reasons why AE-COPD increased especially in elderly people.

### **Effect on aging society**

According to the report of government of Japan, 93% of the fatalities were drowning and more than 60% of them were 60 years old or more in the Great East Japan earthquake. Although it was reported by many previous reports that elderly people had a greater risk of death after the earthquake, the proportion of elderly people was extremely high in comparison to other major earthquake or tsunami in the world<sup>4-8</sup>. Similar finding was reported only in 1995 Hanshin-Awaji earthquake and 2004 Mid Niigata earthquake in Japan<sup>12 17</sup>. Moreover, 90.8% of the patients hospitalized for respiratory disease after the earthquake were 60 years old or more in our study. These result suggested that elderly people were vulnerable not only immediately after the earthquake but also for a while after the earthquake.

In 1999 Taiwan earthquake, 2003 heat waves in the Czech Republic, and 2004 Sumatra-Andaman earthquake, it is demonstrated that these disasters has left decreased mortality in the stricken area, resulted from a large number of direct death by disasters among a vulnerable population such as elderly people or children<sup>5 30 31</sup>, called “harvesting effect”. However, our observation suggests that, in the aging society, a huge disaster not only directly kills the vulnerable people but also newly produces vulnerable people. Previous reports demonstrated that prolonged harmful influence on mental health and psychological slow recovery were seen more frequently in the elderly people than young people<sup>32-35</sup>. Therefore, we should pay a long-term attention on those elderly people after a disaster.

### **Implications for policy and practice**

Our observation suggests two important targets for reducing hospitalization for respiratory disease after the major disaster in aging society. One target is interruption of treatment for chronic respiratory disease and the other target is deterioration of ADL. Interruption of treatment for chronic respiratory disease was preventable by storing the drugs for a few days. However, it is necessary for valid storage to grasp regional prescription data of each drug and patient’s personal medication data. Telemedicine system or web-based patient data storage system might be useful. Prevention of deterioration of ADL is also important. Elderly people is potentially vulnerable and easily deteriorate their ADL. In our study, remaining at shelters in

1  
2  
3  
4  
5 stricken area for more than three weeks led increase in deterioration of ADL and hospitalization  
6 for respiratory diseases. Therefore, we propose to transfer elderly people to out of the stricken  
7 area as soon as possible.  
8  
9

### 10 11 **Strengths and weaknesses of study**

12 Our study had two important strengths. First, the Great East Japan Earthquake hit one of the  
13 most advanced aging societies in the world<sup>3</sup>. As the proportion of elderly people continues to  
14 increase in not only developed countries but also developing countries, there is an urgent need  
15 of information and analysis on the aging society to plan countermeasures against it. Our study  
16 will give lessons against natural disaster to all the countries. Secondly, we obtained detailed data  
17 of patient's demographics, diagnosis, and ADL in a catastrophic situation. It is because that our  
18 hospital has kept its medical function, including electronic medical record system or laboratory  
19 systems, while devastating earthquake and tsunami hit Ishinomaki city and almost all medical  
20 facilities lost their function, and that staffs in our hospital has trained for the coming earthquake  
21 and has had an strong motivation to record disaster medicine for the future.  
22  
23

24 Our study is single center study. This might be weakness of our study, but our hospital was the  
25 only functional hospital after the earthquake in Ishinomaki medical zone which account for  
26 more than 30% of victims of this earthquake. Also, it has been the only hospital which has the  
27 department of respiratory medicine and pulmonary specialists in the medical zone. Even in the  
28 ordinary time, it accepted almost all of the serious patients with pulmonary diseases who needed  
29 hospitalization. Therefore, we think our study well represents impact of the earthquake on  
30 pulmonary diseases<sup>2</sup>. It is also weakness of our study that we analyzed only hospitalized  
31 patients. There were a great number of outpatients and a heavy loss of lives. These events will  
32 be analyzed in the future report. Another weakness of our study is that cross-sectional study  
33 cannot elucidate a causal relationship. Finally, we did not clearly define the condition of  
34 hospitalization. Because the destruction of ordinary healthcare system and poor hygiene outside  
35 the hospital, we hospitalized some patients who could be treated in outpatient setting in ordinary  
36 time. However, this was a real situation after devastating disaster.  
37  
38  
39  
40  
41  
42  
43  
44  
45  
46

### 47 **Conclusion**

48 The Great East Japan earthquake and following tsunami hit the one of the most advanced aging  
49 society in the world. After the disaster, pneumonia, exacerbation of COPD, bronchial asthma  
50 attack associated with bad ADL in elderly provoked the most part of hospitalization for  
51 pulmonary diseases. These observations should be exploited in constructing emergency medical  
52 management for disasters in progressive advanced aging society.  
53  
54  
55  
56  
57  
58  
59  
60

## Acknowledgement

We would like to express our gratitude to all the teams and volunteers from area of Japan and foreign countries for kind and warm supports. We also thank doctors, nurses, and other employees in Japanese Red Cross Ishinomaki Hospital.

**Competing interests:** None declared.

**Ethical approval:** Approval of ethical review committee of Japanese Red Cross Ishinomaki Hospital was obtained.

**Contributors:** SY was responsible for study design and interpretation of the data, and drafted the manuscript. MH, SK, HS, ST, and MY were responsible for collection and interpretation of the data. KN drafted the statistical analysis part in the manuscript, and provided suggestions on public health and epidemiology. MH, SK and MY were responsible for study design and revised the drafted manuscript. SY, MH, SK, HS, ST and MY treated the patients. All authors approved the final version of the manuscript.

**Data sharing statement:** There is no additional data available.

**Funding:** This study was not funded by any research funds.

## References

1. McCurry J. Japan: the aftermath. *Lancet* 2011;**377**:1061-1062.
2. National Police Agency. *Dmage Situation and Police Countermeasure*. [www.npa.go.jp/archive/keibi/biki/index\\_e.htm](http://www.npa.go.jp/archive/keibi/biki/index_e.htm) (accessed 29 Dec 2011).
3. Tamiya N, Noguchi H, Nishi A, *et al*. Population ageing and wellbeing: lessons from Japan's long-term care insurance policy. *Lancet* 2011;**378**:1183-1192.
4. Liang NJ, Shih YT, Shih FY, *et al*. Disaster epidemiology and medical response in the Chi-Chi earthquake in Taiwan. *Ann Emerg Med* 2001;**38**:549-555.
5. Chan CC, Lin YP, Chen HH, *et al*. A population-based study on the immediate and prolonged effects of the 1999 Taiwan earthquake on mortality. *Ann Epidemiol* 2003;**13**:502-508.
6. Nishikiori N, Abe T, Costa DG, *et al*. Who died as a result of the tsunami? Risk factors of mortality among internally displaced persons in Sri Lanka: a retrospective cohort analysis. *BMC Public Health* 2006;**6**:73.
7. Rofi A, Doocy S, Robinson C. Tsunami mortality and displacement in Aceh province, Indonesia. *Disasters* 2006;**30**:340-350.
8. Doocy S, Rofi A, Moodie C, *et al*. Tsunami mortality in Aceh Province, Indonesia. *Bull World Health Organ* 2007;**85**:273-278.
9. Chou YJ, Huang N, Lee CH, *et al*. Who is at risk of death in an earthquake? *Am J Epidemiol* 2004;**160**:688-695.
10. Osaki Y, Minowa M. Factors associated with earthquake deaths in the great Hanshin-Awaji

- 1  
2  
3  
4  
5 earthquake, 1995. *Am J Epidemiol* 2001;**153**:153-156.
- 6  
7 11. Takakura R, Himeno S, Kanayama Y, *et al*. Follow-up after the Hanshin-Awaji earthquake:  
8 diverse influences on pneumonia, bronchial asthma, peptic ulcer and diabetes mellitus. *Intern*  
9 *Med* 1997;**36**:87-91.
- 10  
11 12. Tanaka H, Oda J, Iwai A, *et al*. Morbidity and mortality of hospitalized patients after the  
12 1995 Hanshin-Awaji earthquake. *Am J Emerg Med* 1999;**17**:186-191.
- 13  
14 13. Matsuoka T, Yoshioka T, Oda J, *et al*. The impact of a catastrophic earthquake on morbidity  
15 rates for various illnesses. *Public Health* 2000;**114**:249-253.
- 16  
17 14. Guha-Sapir D, van Panhuis WG. Health impact of the 2004 Andaman Nicobar earthquake  
18 and tsunami in Indonesia. *Prehosp Disaster Med* 2009;**24**:493-499.
- 19  
20 15. Chierakul W, Winothai W, Wattanawaitunechai C, *et al*. Melioidosis in 6 tsunami survivors  
21 in southern Thailand. *Clin Infect Dis* 2005;**41**:982-990.
- 22  
23 16. Potera C. In disaster's wake: tsunami lung. *Environ Health Perspect* 2005;**113**:A734.
- 24  
25 17. Tanida N. What happened to elderly people in the great Hanshin earthquake. *BMJ*  
26 1996;**313**:1133-1135.
- 27  
28 18. Guha-Sapir D, van Panhuis WG, Lagoutte J. Short communication: patterns of chronic and  
29 acute diseases after natural disasters - a study from the International Committee of the Red  
30 Cross field hospital in Banda Aceh after the 2004 Indian Ocean tsunami. *Trop Med Int Health*  
31 2007;**12**:1338-1341.
- 32  
33 19. Miller AC, Arquilla B. Chronic diseases and natural hazards: impact of disasters on diabetic,  
34 renal, and cardiac patients. *Prehosp Disaster Med* 2008;**23**:185-194.
- 35  
36 20. Tomita K, Hasegawa Y, Watanabe M, *et al*. The Totton-Ken Seibu earthquake and  
37 exacerbation of asthma in adults. *J Med Invest* 2005;**52**:80-84.
- 38  
39 21. Soriano JB, Davis KJ, Coleman B, *et al*. The proportional Venn diagram of obstructive lung  
40 disease: two approximations from the United States and the United Kingdom. *Chest*  
41 2003;**124**:474-481.
- 42  
43 22. Pauwels RA. Similarities and differences in asthma and chronic obstructive pulmonary  
44 disease exacerbations. *Proc Am Thorac Soc* 2004;**1**:73-76.
- 45  
46 23. Maeda H, Nakagawa M, Yokoyama M. Hospital admissions for respiratory diseases in the  
47 aftermath of the great Hanshin earthquake[Article in Japanese]. *Nihon Kyobu Shikkan Gakkai*  
48 *Zasshi* 1996;**34**:164-173.
- 49  
50 24. El-Solh AA, Pietrantonio C, Bhat A, *et al*. Microbiology of severe aspiration pneumonia in  
51 institutionalized elderly. *Am J Respir Crit Care Med* 2003;**167**:1650-1654.
- 52  
53 25. Loeb MB, Becker M, Eady A, Walker-Dilks C. Interventions to prevent aspiration  
54 pneumonia in older adults: a systematic review. *J Am Geriatr Soc* 2003;**51**:1018-1022.
- 55  
56 26. Langmore SE, Skarupski KA, Park PS, *et al*. Predictors of aspiration pneumonia in nursing  
57  
58  
59  
60

1  
2  
3  
4  
5  
6  
7  
8  
9  
10  
11  
12  
13  
14  
15  
16  
17  
18  
19  
20  
21  
22  
23  
24  
25  
26  
27  
28  
29  
30  
31  
32  
33  
34  
35  
36  
37  
38  
39  
40  
41  
42  
43  
44  
45  
46  
47  
48  
49  
50  
51  
52  
53  
54  
55  
56  
57  
58  
59  
60

home residents. *Dysphagia* 2002;**17**:298-307.

27. Terpenning MS, Taylor GW, Lopatin DE, *et al.* Aspiration pneumonia: dental and oral risk factors in an older veteran population. *J Am Geriatr Soc* 2001;**49**:557-563.

28. Yoshino A, Ebihara T, Ebihara S, *et al.* Daily oral care and risk factors for pneumonia among elderly nursing home patients. *JAMA* 2001;**286**:2235-2236.

29. Kobayashi S, Kubo H, Yanai M. Impairment of swallowing in COPD. *Am J Respir Crit Care Med* 2009;**180**:481.

30. Nishikiori N, Abe T, Costa DG, *et al.* Timing of mortality among internally displaced persons due to the tsunami in Sri Lanka: cross sectional household survey. *BMJ* 2006;**332**:334-335.

31. Kysely J, Kriz B. Decreased impacts of the 2003 heat waves on mortality in the Czech Republic: an improved response? *Int J Biometeorol* 2008;**52**:733-745.

32. Toyabe S, Shioiri T, Kuwabara H, *et al.* Impaired psychological recovery in the elderly after the Niigata-Chuetsu Earthquake in Japan: a population-based study. *BMC Public Health* 2006;**6**:230.

33. Seplaki CL, Goldman N, Weinstein M, *et al.* Before and after the 1999 Chi-Chi earthquake: traumatic events and depressive symptoms in an older population. *Soc Sci Med* 2006;**62**:3121-3132.

34. Ueki A, Morita Y, Miyoshi K. Changes in symptoms after the great Hanshin Earthquake in patients with dementia[Article in Japanese]. *Nihon Ronen Igakkai Zasshi* 1996;**33**:573-579.

35. Maeda K, Kakigi T. Manifestation of the symptoms in demented patients after the Great Hanshin Earthquake in Japan[Article in Japanese]. *Seishin Shinkeigaku Zasshi* 1996;**98**:320-328.

**Tables**

Table 1. Demographics and patient characteristics in 2011 and past two years.

|             | After the<br>earthquake (2011)<br>n=322 | Past two years<br>(2010 and 2011)<br>n=204 | p value |
|-------------|-----------------------------------------|--------------------------------------------|---------|
| All cause   |                                         |                                            |         |
| age (year)  | 75.7±12.5 *                             | 73.2±13.4                                  | 0.03    |
| male        | 192 (59.6)                              | 137 (67.2)                                 | 0.08    |
| Pneumonia   |                                         |                                            |         |
| age         | 77.6±11.8*                              | 74.3±12.8                                  | 0.03    |
| male        | 111 (58.4)                              | 63 (66.3)                                  | 0.20    |
| AE-COPD     |                                         |                                            |         |
| age         | 76.0±8.7*                               | 69.3±15.9                                  | 0.03    |
| male        | 43 (81.1) *                             | 8 (50.0)                                   | 0.01    |
| Asthma      |                                         |                                            |         |
| age         | 68.7±19.7                               | 67.2±19.4                                  | 0.83    |
| male        | 5 (18.5) *                              | 6 (54.6)                                   | 0.03    |
| Lung cancer |                                         |                                            |         |
| age         | 74.3±12.1                               | 73.2±16.0                                  | 0.79    |
| male        | 16 (72.7)                               | 18 (66.7)                                  | 0.65    |
| Others      |                                         |                                            |         |
| age         | 70.4±11.6                               | 73.8±11.3                                  | 0.19    |
| male        | 17 (56.7)                               | 42 (76.4)                                  | 0.06    |

AE-COPD, acute exacerbation of COPD.

Data are mean±SD for numerical variables and number (%) for categorical variables. \*p<0.05.



Table 2. Association of age and sex with hospitalization for respiratory disease after the earthquake.

|                          | Hospitalization for respiratory disease after the earthquake |                                |
|--------------------------|--------------------------------------------------------------|--------------------------------|
|                          | Unadjusted OR (95% CI)                                       | *Adjusted OR (95% CI)          |
| All cause                |                                                              |                                |
| age (year)               | 1.01 <sup>†</sup> (1.00-1.03)                                | 1.02 <sup>†</sup> (1.00-1.03)  |
| male (reference: female) | 0.72 (0.50-1.04)                                             | 0.71 (0.19-1.03)               |
| Pneumonia                |                                                              |                                |
| age                      | 1.02 <sup>†</sup> (1.00-1.04)                                | 1.02 <sup>†</sup> (1.00-1.04)  |
| male                     | 0.71 (0.42-1.19)                                             | 0.74 (0.44-1.23)               |
| AE-COPD                  |                                                              |                                |
| age                      | 1.05 <sup>†</sup> (1.00-1.11)                                | 1.05 (1.00-1.11)               |
| male                     | 4.30 <sup>†</sup> (1.30-14.66)                               | 4.17 <sup>†</sup> (1.21-14.84) |
| Asthma                   |                                                              |                                |
| age                      | 1.00 (0.97-1.04)                                             | 1.00 (0.96-1.05)               |
| male                     | 0.19 <sup>†</sup> (0.04-0.85)                                | 0.19 <sup>†</sup> (0.04-0.85)  |
| Lung cancer              |                                                              |                                |
| age                      | 1.01 (0.97-1.05)                                             | 1.00 (0.96-1.05)               |
| male                     | 1.33 (0.39-4.76)                                             | 1.30 (0.37-4.83)               |
| Others                   |                                                              |                                |
| age                      | 0.97 (0.94-1.01)                                             | 0.97 (0.93-1.01)               |
| male                     | 0.40 (0.15-1.05)                                             | 0.39 (0.15-1.03)               |

AE-COPD, acute exacerbation of COPD; OR, odds ratio; CI, confidence interval.

\*Adjusted for age and sex with each other. <sup>†</sup>p<0.05

Table 3. Association of ADL with patient's characteristics and respiratory disease.

|             | Independent<br>n=70 | Newly<br>dependent<br>n=104 | Originally<br>dependent<br>n=137 |
|-------------|---------------------|-----------------------------|----------------------------------|
| Age         | 69.9±15.1           | 73.1±11.2                   | 80.3±10.5                        |
| Male        | 49 (70.0)           | 63 (60.6)                   | 69 (50.4)                        |
| Diagnosis   |                     |                             |                                  |
| Pneumonia   | 31 (44.3)           | 59 (56.7)                   | 94 (68.6)                        |
| AE-COPD     | 17 (24.3)           | 17 (16.4)                   | 15 (11.0)                        |
| Asthma      | 11 (15.7)           | 11 (10.6)                   | 5 (3.7)                          |
| Lung cancer | 3 (4.3)             | 6 (5.8)                     | 12 (8.8)                         |
| Others      | 8 (11.4)            | 11 (8.0)                    | 11 (8.0)                         |

AE-COPD, acute exacerbation of COPD.

Data are mean ±SD for numerical variables and number (%) for categorical variables.

**Figure legends**

Figure 1. Sequential change of the number of unscheduled hospitalization for all causes (A) and for respiratory disease (B) from March 11 to May 9 in 2011, 2010 and 2009.

Figure 2. The number and proportion of patients hospitalized for respiratory disease from March 11 to May 9 in 2011, 2010, and 2009.

Figure 3. Sequential change of disease distribution of patients hospitalized for respiratory disease after the Great East Japan earthquake.

Figure 4. Influence of the earthquake on the patient's ADL.

1  
2  
3  
4  
5  
6  
7  
8  
9  
10  
11  
12  
13  
14  
15  
16  
17  
18  
19  
20  
21  
22  
23  
24  
25  
26  
27  
28  
29  
30  
31  
32  
33  
34  
35  
36  
37  
38  
39  
40  
41  
42  
43  
44  
45  
46  
47  
48  
49  
50  
51  
52  
53  
54  
55  
56  
57  
58  
59  
60

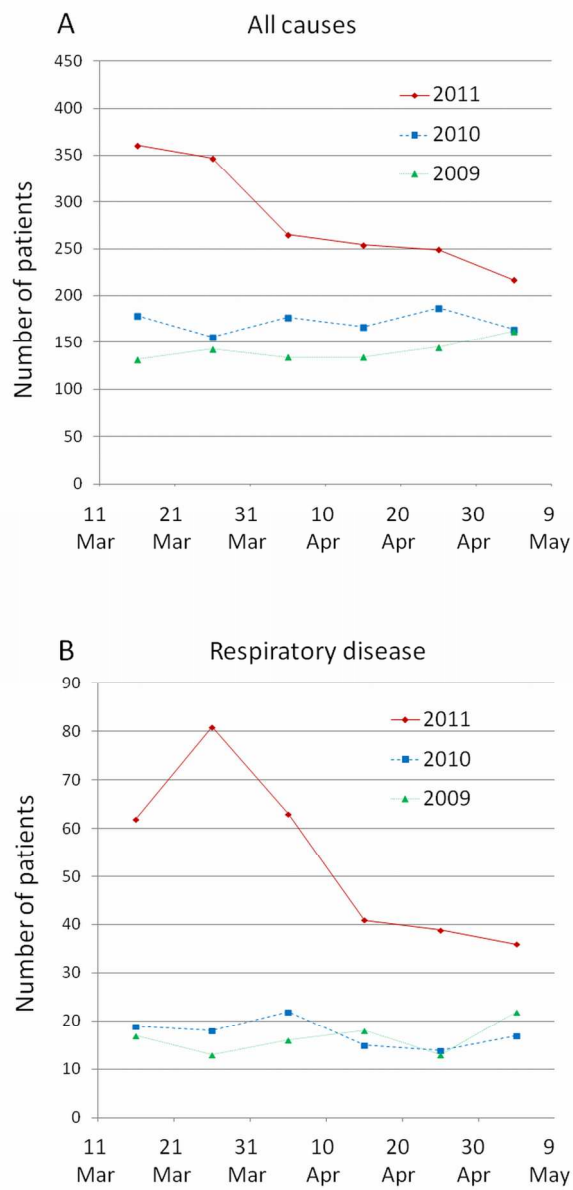

Figure 1. The number of unscheduled hospitalization for all causes (A) and for respiratory disease (B) from March 11 to May 9 in 2009, 2010 and 2011, presented in 10 day bins.  
90x185mm (300 x 300 DPI)

1  
2  
3  
4  
5  
6  
7  
8  
9  
10  
11  
12  
13  
14  
15  
16  
17  
18  
19  
20  
21  
22  
23  
24  
25  
26  
27  
28  
29  
30  
31  
32  
33  
34  
35  
36  
37  
38  
39  
40  
41  
42  
43  
44  
45  
46  
47  
48  
49  
50  
51  
52  
53  
54  
55  
56  
57  
58  
59  
60

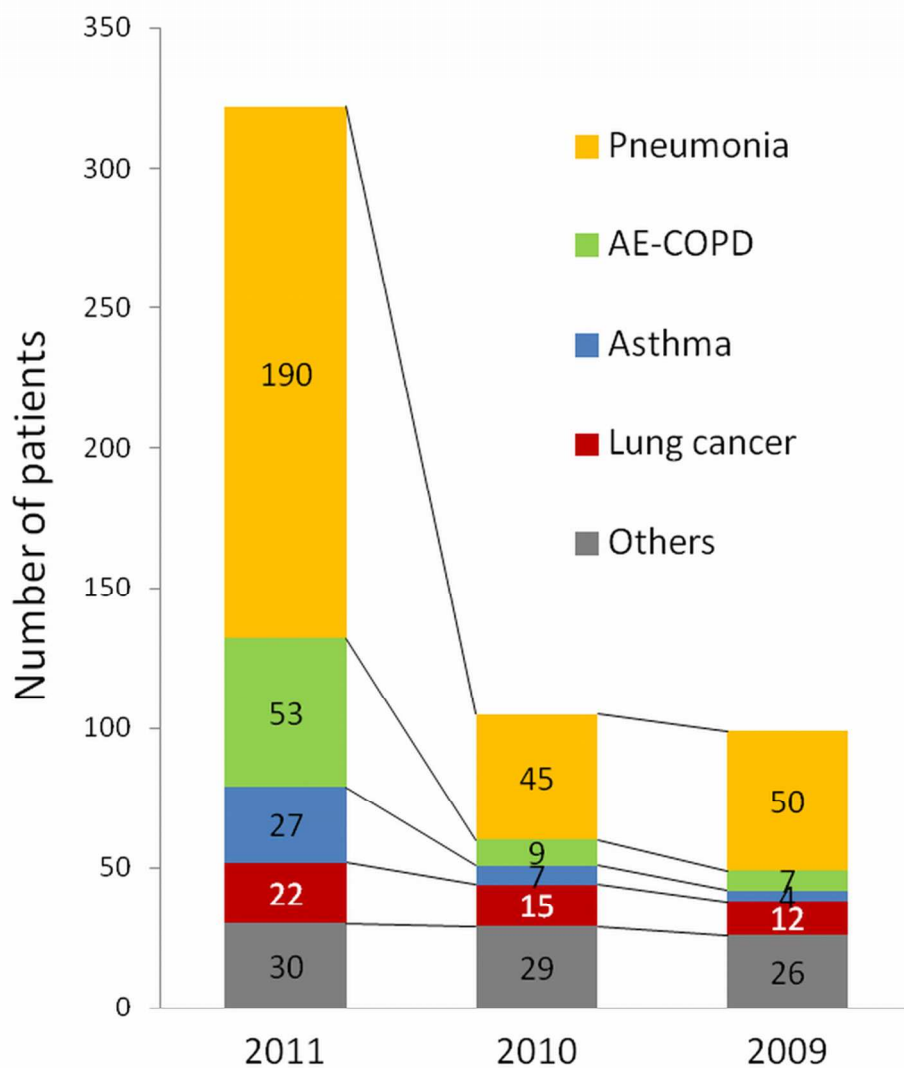

90x102mm (300 x 300 DPI)

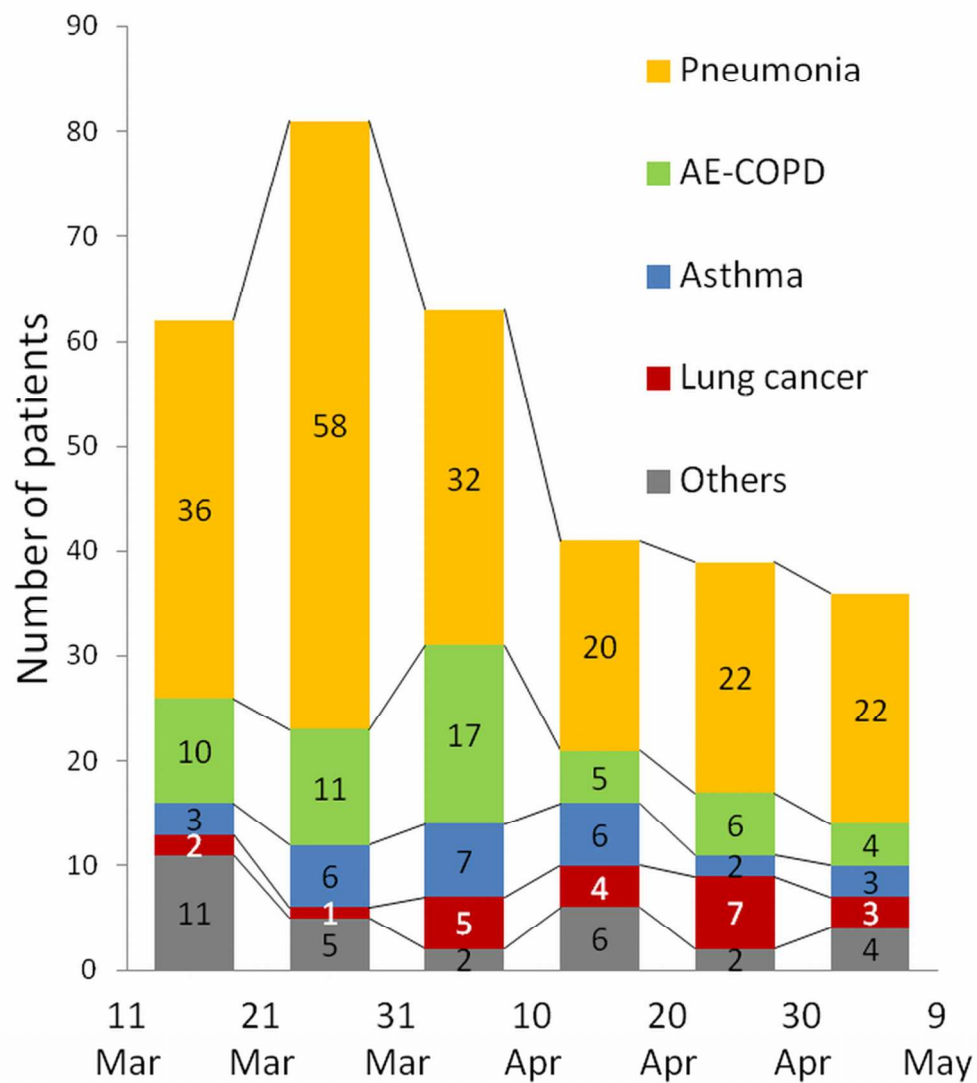

Figure 3. Distribution of patients hospitalized for respiratory disease after the Great East Japan earthquake from March 11 to May 9 in 2011, presented in 10 day bins.  
90x104mm (300 x 300 DPI)

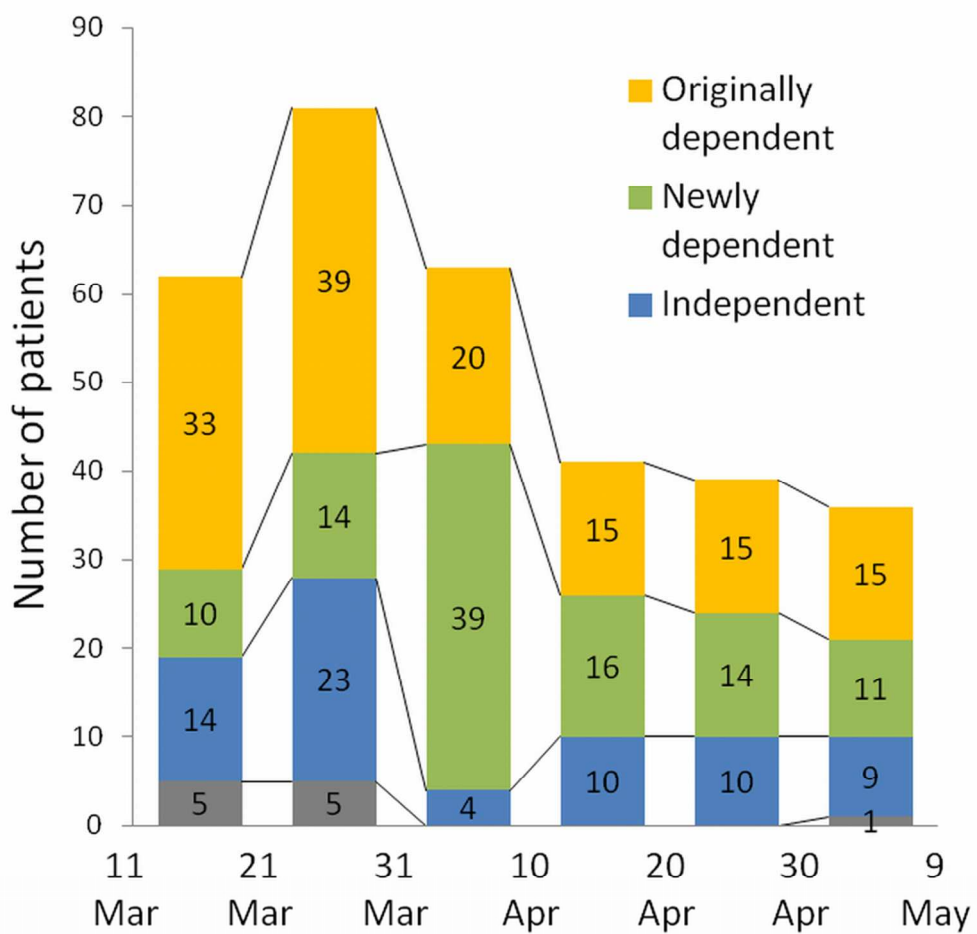

90x88mm (300 x 300 DPI)

BMJ

1  
2  
3  
4  
5  
6  
7  
8  
9  
10  
11  
12  
13  
14  
15  
16  
17  
18  
19  
20  
21  
22  
23  
24  
25  
26  
27  
28  
29  
30  
31  
32  
33  
34  
35  
36  
37  
38  
39  
40  
41  
42  
43  
44  
45  
46  
47  
48  
49  
50  
51  
52  
53  
54  
55  
56  
57  
58  
59  
60

STROBE 2007 (v4) Statement—Checklist of items that should be included in reports of *cross-sectional studies*

| Section/Topic             | Item # | Recommendation                                                                                                                                                                       | Reported on page # |
|---------------------------|--------|--------------------------------------------------------------------------------------------------------------------------------------------------------------------------------------|--------------------|
| Title and abstract        | 1      | (a) Indicate the study’s design with a commonly used term in the title or the abstract                                                                                               | 1                  |
|                           |        | (b) Provide in the abstract an informative and balanced summary of what was done and what was found                                                                                  | 2, 3               |
| <b>Introduction</b>       |        |                                                                                                                                                                                      |                    |
| Background/rationale      | 2      | Explain the scientific background and rationale for the investigation being reported                                                                                                 | 3-4                |
| Objectives                | 3      | State specific objectives, including any prespecified hypotheses                                                                                                                     | 3-4                |
| <b>Methods</b>            |        |                                                                                                                                                                                      |                    |
| Study design              | 4      | Present key elements of study design early in the paper                                                                                                                              | 4-6                |
| Setting                   | 5      | Describe the setting, locations, and relevant dates, including periods of recruitment, exposure, follow-up, and data collection                                                      | 4-6                |
| Participants              | 6      | (a) Give the eligibility criteria, and the sources and methods of selection of participants                                                                                          | 4-6                |
| Variables                 | 7      | Clearly define all outcomes, exposures, predictors, potential confounders, and effect modifiers. Give diagnostic criteria, if applicable                                             | 4-6                |
| Data sources/ measurement | 8*     | For each variable of interest, give sources of data and details of methods of assessment (measurement). Describe comparability of assessment methods if there is more than one group | 4-6                |
| Bias                      | 9      | Describe any efforts to address potential sources of bias                                                                                                                            | -                  |
| Study size                | 10     | Explain how the study size was arrived at                                                                                                                                            | 4                  |
| Quantitative variables    | 11     | Explain how quantitative variables were handled in the analyses. If applicable, describe which groupings were chosen and why                                                         | 4, 5               |
| Statistical methods       | 12     | (a) Describe all statistical methods, including those used to control for confounding                                                                                                | 5, 6               |
|                           |        | (b) Describe any methods used to examine subgroups and interactions                                                                                                                  | -                  |
|                           |        | (c) Explain how missing data were addressed                                                                                                                                          | 7                  |
|                           |        | (d) If applicable, describe analytical methods taking account of sampling strategy                                                                                                   | -                  |
|                           |        | (e) Describe any sensitivity analyses                                                                                                                                                | -                  |
| <b>Results</b>            |        |                                                                                                                                                                                      |                    |

1  
2  
3  
4  
5  
6  
7  
8  
9  
10  
11  
12  
13  
14  
15  
16  
17  
18  
19  
20  
21  
22  
23  
24  
25  
26  
27  
28  
29  
30  
31  
32  
33  
34  
35  
36  
37  
38  
39  
40  
41  
42  
43  
44  
45  
46  
47  
48  
49



|                          |     |                                                                                                                                                                                                              |               |
|--------------------------|-----|--------------------------------------------------------------------------------------------------------------------------------------------------------------------------------------------------------------|---------------|
| Participants             | 13* | (a) Report numbers of individuals at each stage of study—eg numbers potentially eligible, examined for eligibility, confirmed eligible, included in the study, completing follow-up, and analysed            | 6             |
|                          |     | (b) Give reasons for non-participation at each stage                                                                                                                                                         | -             |
|                          |     | (c) Consider use of a flow diagram                                                                                                                                                                           | -             |
| Descriptive data         | 14* | (a) Give characteristics of study participants (eg demographic, clinical, social) and information on exposures and potential confounders                                                                     | 6-7 + Table 1 |
|                          |     | (b) Indicate number of participants with missing data for each variable of interest                                                                                                                          | 7             |
| Outcome data             | 15* | Report numbers of outcome events or summary measures                                                                                                                                                         | 3             |
| Main results             | 16  | (a) Give unadjusted estimates and, if applicable, confounder-adjusted estimates and their precision (eg, 95% confidence interval). Make clear which confounders were adjusted for and why they were included | 3 + Table 2   |
|                          |     | (b) Report category boundaries when continuous variables were categorized                                                                                                                                    | 5             |
|                          |     | (c) If relevant, consider translating estimates of relative risk into absolute risk for a meaningful time period                                                                                             | -             |
| Other analyses           | 17  | Report other analyses done—eg analyses of subgroups and interactions, and sensitivity analyses                                                                                                               | -             |
| <b>Discussion</b>        |     |                                                                                                                                                                                                              |               |
| Key results              | 18  | Summarise key results with reference to study objectives                                                                                                                                                     | 8             |
| Limitations              | 19  | Discuss limitations of the study, taking into account sources of potential bias or imprecision. Discuss both direction and magnitude of any potential bias                                                   | 11            |
| Interpretation           | 20  | Give a cautious overall interpretation of results considering objectives, limitations, multiplicity of analyses, results from similar studies, and other relevant evidence                                   | 8, 10-11      |
| Generalisability         | 21  | Discuss the generalisability (external validity) of the study results                                                                                                                                        | 10-11         |
| <b>Other information</b> |     |                                                                                                                                                                                                              |               |
| Funding                  | 22  | Give the source of funding and the role of the funders for the present study and, if applicable, for the original study on which the present article is based                                                | 12            |

\*Give information separately for cases and controls in case-control studies and, if applicable, for exposed and unexposed groups in cohort and cross-sectional studies.

**Note:** An Explanation and Elaboration article discusses each checklist item and gives methodological background and published examples of transparent reporting. The STROBE checklist is best used in conjunction with this article (freely available on the Web sites of PLoS Medicine at <http://www.plosmedicine.org/>, Annals of Internal Medicine at <http://www.annals.org/>, and Epidemiology at <http://www.epidem.com/>). Information on the STROBE Initiative is available at [www.strobe-statement.org](http://www.strobe-statement.org).



**The impact of the 2011 Great East Japan Earthquake on hospitalization for respiratory disease in rapidly aging society: a retrospective descriptive and cross-sectional study at the disaster base hospital in Ishinomaki**

|                                 |                                                                                                                                                                                                                                                                                                                                                                                                                                                                                                                                                                                                                                                                                                                 |
|---------------------------------|-----------------------------------------------------------------------------------------------------------------------------------------------------------------------------------------------------------------------------------------------------------------------------------------------------------------------------------------------------------------------------------------------------------------------------------------------------------------------------------------------------------------------------------------------------------------------------------------------------------------------------------------------------------------------------------------------------------------|
| Journal:                        | <i>BMJ Open</i>                                                                                                                                                                                                                                                                                                                                                                                                                                                                                                                                                                                                                                                                                                 |
| Manuscript ID:                  | bmjopen-2012-000865.R1                                                                                                                                                                                                                                                                                                                                                                                                                                                                                                                                                                                                                                                                                          |
| Article Type:                   | Research                                                                                                                                                                                                                                                                                                                                                                                                                                                                                                                                                                                                                                                                                                        |
| Date Submitted by the Author:   | 05-Nov-2012                                                                                                                                                                                                                                                                                                                                                                                                                                                                                                                                                                                                                                                                                                     |
| Complete List of Authors:       | Yamanda, Shinsuke; Japanese Red Cross Ishinomaki Hospital, Respiratory Medicine<br>Hanagama, Masakazu; Japanese Red Cross Ishinomaki Hospital, Department of respiratory medicine<br>Kobayashi, Seiichi; Japanese Red Cross Ishinomaki Hospital, Department of respiratory medicine<br>Satou, Hikari; Japanese Red Cross Ishinomaki Hospital, Department of respiratory medicine<br>Tokuda, Shinsaku; Kobe University Graduate School of Medicine, Division of Cell Biology<br>Niu, Kaijun; Tohoku University Graduate School of Biomedical Engineering, Division of Biomedical Engineering for Health and Welfare<br>Yanai, Masaru; Japanese Red Cross Ishinomaki Hospital, Department of respiratory medicine |
| <b>Primary Subject Heading</b>: | Respiratory medicine                                                                                                                                                                                                                                                                                                                                                                                                                                                                                                                                                                                                                                                                                            |
| Secondary Subject Heading:      | Geriatric medicine, Emergency medicine                                                                                                                                                                                                                                                                                                                                                                                                                                                                                                                                                                                                                                                                          |
| Keywords:                       | GERIATRIC MEDICINE, Adult thoracic medicine < THORACIC MEDICINE, ACCIDENT & EMERGENCY MEDICINE                                                                                                                                                                                                                                                                                                                                                                                                                                                                                                                                                                                                                  |
|                                 |                                                                                                                                                                                                                                                                                                                                                                                                                                                                                                                                                                                                                                                                                                                 |

SCHOLARONE™  
Manuscripts

1  
2  
3  
4  
5  
6  
7  
8  
9  
10  
11  
12  
13  
14  
15  
16  
17  
18  
19  
20  
21  
22  
23  
24  
25  
26  
27  
28  
29  
30  
31  
32  
33  
34  
35  
36  
37  
38  
39  
40  
41  
42  
43  
44  
45  
46  
47  
48  
49  
50  
51  
52  
53  
54  
55  
56  
57  
58  
59  
60

1 **Title**

2 The impact of the 2011 Great East Japan Earthquake on hospitalization for respiratory disease in  
3 rapidly aging society: a retrospective descriptive and cross-sectional study at the disaster base  
4 hospital in Ishinomaki

5  
6 **Author names**

7 Shinsuke Yamanda *physician scientist*<sup>1</sup>, Masakazu Hanagama *physician scientist*<sup>1</sup>, Seiichi  
8 Kobayashi *senior physician scientist*<sup>1</sup>, Hikari Satou *resident*<sup>1</sup>, Shinsaku Tokuda *lecturer*<sup>2</sup>,  
9 Kaijun Niu *associate professor*<sup>3</sup>, Masaru Yanai *director*<sup>1</sup>

10  
11 <sup>1</sup>Department of respiratory medicine, Japanese Red Cross Ishinomaki Hospital, 71 Hebita Aza  
12 Nishimichishita, Ishinomaki, Miyagi, Japan

13  
14 <sup>2</sup>Division of Cell Biology, Kobe University Graduate School of Medicine, 7-5-1 Kusunoki-cho,  
15 chuo-ku, Kobe, Hyogo, Japan

16  
17 <sup>3</sup>Division of Biomedical Engineering for Health and Welfare, Tohoku University Graduate  
18 School of Biomedical Engineering, 2-1 Seiryō-machi, Aoba-ku, Sendai, Miyagi, Japan

19  
20 **Correspondence to:** Shinsuke Yamanda [syamanda@gmail.com](mailto:syamanda@gmail.com)

1  
2  
3  
4  
5  
6  
7  
8  
9  
10  
11  
12  
13  
14  
15  
16  
17  
18  
19  
20  
21  
22  
23  
24  
25  
26  
27  
28  
29  
30  
31  
32  
33  
34  
35  
36  
37  
38  
39  
40  
41  
42  
43  
44  
45  
46  
47  
48  
49  
50  
51  
52  
53  
54  
55  
56  
57  
58  
59  
60

1 **Article summary**

2 **Article focus**

3 The Great East Japan Earthquake attacked one of the most rapidly aging societies in  
4 the world. Respiratory medicine is the major field in gerontology. Here we address how  
5 seriously the disaster affected respiratory diseases in the most heavily stricken area,  
6 which has one of the highest ratios of elderly people in Japan.

7 The study gives lessons against natural disasters and aging society.

8 **Key messages**

9 After the earthquake and tsunami, admission from pneumonia and exacerbation of chronic  
10 respiratory disease in elderly increased.

11 Harsh conditions and poor ADL after the disaster may be associated with increase in  
12 hospitalization for respiratory diseases in elderly people.

13 **Strengths and limitations of study**

14 We could obtain detailed data of patient even in the catastrophic state.

15 We analyzed only hospitalized patients. But there were a great number of outpatients  
16 as well as heavy loss of lives.

**Abstract****Objective**

To investigate the impact of the 2011 Great East Japan earthquake on hospitalization for respiratory disease at the disaster base hospital in aging society.

**Design**

Descriptive and cross sectional study.

**Setting**

Emergency care in Japanese Red Cross Ishinomaki Hospital, a regional disaster base hospital, Miyagi, Japan.

**Participants**

322 emergency patients who hospitalized for respiratory disease from March 11 to May 9 in 2011, and 99 and 105 emergency patients who hospitalized in the corresponding period of 2009 and 2010, respectively.

**Main outcome measures**

Description and comparison of patient's characteristics and disease distribution in terms of age, time after the disaster, and activities of daily living (ADL).

**Results**

Total number of patients hospitalized in our hospital in the study period was 1769 (850 in 2009, 1030 in 2010), and the number of hospitalized for respiratory disease in them was 322 (99 in 2009, 105 in 2010). Among admission for pulmonary diseases, pneumonia was the most frequent disease (n=190, 59.0%), followed by acute exacerbation of chronic obstructive disease (AE-COPD) (n=53, 16.5%), attack of asthma (n=27, 8.4%), and progression of lung cancer (n=22, 6.8%). Compared with the corresponding period of 2009 or 2010, increase in absolute number of hospitalization was the highest for pneumonia, followed by AE-COPD and attack of asthma. At hospitalization, 195 patients were "dependent" and 54 patients were "partially dependent". Respiratory admission accompanied by deterioration of ADL after the disaster was more frequent in elderly and female patients.

**Conclusions**

After the Great East Japan Earthquake, admission for pneumonia and exacerbation of chronic respiratory disease in elderly increased at the disaster base hospital.

## 1 Introduction

2 On March 11, 2011, at 2:46 pm Japan time, the Pacific coast of Japan's Tohoku (northeastern)  
3 region was struck by the massive earthquake (The Great East Japan Earthquake), measuring  
4 magnitude 9.0 on the Richter scale<sup>1</sup>. The earthquake triggered a devastating tsunami which  
5 destroyed many towns and villages near the seashore. The epicenter was estimated to be about  
6 70 kilometers east of Oshika Peninsula of Ishinomaki in Miyagi. Officially, over 19,000 people  
7 were killed or missing and the maximum number of refugees reached more than 550,000<sup>2</sup>.

8 Ishinomaki city, located in Pacific coast of Honshu Island, suffered from the largest number of  
9 victims in Japan, 3,280 people were killed and 669 people were still missing. A great number of  
10 casualties, more than 10,000 patients in the first 30 days, were treated at Japanese Red Cross  
11 Ishinomaki Hospital, a regional disaster base hospital in Ishinomaki which uniquely preserved  
12 its hospital function in Ishinomaki region during and after the disaster.

13 Japan is one of the most rapidly aging society in the world. 23% of Japanese citizens were age  
14 65 or over in 2010<sup>3</sup>. Tohoku region is especially rapidly aging society in Japan, 26.6% of people  
15 living in Ishinomaki city were age 65 or over in 2010. Although several reports showed the  
16 significant association between age and earthquake and tsunami death<sup>4-8</sup>, there were few reports  
17 investigating the impact of a tremendous disaster on elderly peoples in such an aging society<sup>9 10</sup>.  
18 Respiratory diseases are common in the elderly even in ordinary times. So, investigating the  
19 impact of the disasters on respiratory health will contribute to elucidating the problem of aging  
20 society. Thus, we performed retrospective descriptive and cross-sectional analysis of the  
21 medical and epidemiologic data of the patient required hospitalization for respiratory disease  
22 after the Great East Japan Earthquake and following tsunami.

## 23 24 25 Methods

26 This study was a retrospective descriptive and cross-sectional analysis of the data obtained from  
27 the medical records at Japanese Red Cross Ishinomaki Hospital. We reviewed medical records  
28 of patients admitted to the hospital for respiratory diseases during the first 60 days after the  
29 Great East Japan Earthquake, when the hospital solely accepted emergency patients. We also  
30 reviewed medical records of patients who required unscheduled hospitalization for respiratory  
31 disease in the corresponding period of 2009 and 2010.

32 Japanese Red Cross Ishinomaki Hospital which had 402 beds for inpatients was located at 4.5  
33 km inland from Pacific Ocean. It has covered about 220,000 people living in its medical zone  
34 (Ishinomaki City, Onagawa Town, and Higashi-matsushima City) and assigned to a regional  
35 disaster base hospital. It has accepted almost all of the emergency respiratory patients even in  
36 the ordinary time before the disaster, because it has been the unique hospital having the

1 respiratory department and pulmonary specialists in the region.  
2 Medical records were investigated in terms of date of admission, age, sex, diagnosis. We also  
3 investigated activities of daily living (ADL) at hospitalization and ADL before earthquake, and  
4 their residence before admission on the medical record of 2011 study period. For comparison,  
5 the total number of unscheduled hospitalization during the corresponding periods in 2009 and  
6 2010 was counted.

7 Pneumonia was defined as the presence of the infiltration on chest radiograph along with one or  
8 more of the following symptoms or signs: fever, cough, sputum production, breathlessness,  
9 pleuritic chest pain or signs consistent with pneumonia on auscultation.

10 Chronic obstructive pulmonary disease (COPD) and bronchial asthma were detected by the  
11 previous spirometric data, patient's self-report, or physician's diagnosis made by patient's  
12 history, physical examination, and radiological finding. An acute exacerbation of  
13 COPD(AE-COPD) was defined as an increase in or new onset of more than one symptom of  
14 COPD (cough, sputum, wheezing, dyspnea or chest tightness) without pneumonia or  
15 pneumothorax. An attack of asthma was defined as the presentation of wheezes or severe cough  
16 in asthma patients without pneumonia. Progression of lung cancer was defined as requirement  
17 for admission for lung cancer associated condition such as dehydration, respiratory failure, or  
18 uncontrolled pain. Obstructive pneumonia due to lung cancer was considered as progression of  
19 lung cancer. Chest trauma and traumatopnea were not considered as respiratory disease but  
20 chest injury.

21 ADL was assessed by the information from a patient, patient's family, or patient's caregiver, and  
22 classified into three categories; "independent" who could live without particular support,  
23 "partially dependent" who could not leave their residence without any support, "dependent"  
24 who spent a day on the bed or the wheelchair and lost the ability to move for themselves. To  
25 investigate the impact of the disaster on ADL, we defined as "originally dependent" who were  
26 dependent or partially dependent before the disaster, and as "newly dependent" who became  
27 dependent or partially dependent after the disaster.

### 28 29 **Data analysis**

30 All data were entered into a personal computer and analyzed using Microsoft™ Excel software  
31 and statistical analysis was performed using JMP9 (SAS Institute Inc., Cary, NC, USA). A  
32 missing value in medical record was treated as "unknown". Results were given as mean ± SD  
33 for numerical variables and as proportions for categorical variables. To analyze sequential  
34 change of the effect of the disaster, we divided 60 days of study period into six groups of ten  
35 day bins. To investigate the risk of hospitalization for respiratory disease after the earthquake  
36 and tsunami, we compared the patient's characteristics of 2011 study period with the combined

1 data of 2009 and 2010 corresponding period as ordinary time. We used two-sided Student's  
2 *t*-test for numerical variables and chi-square test for the categorical variables. The  $p < 0.05$  is  
3 accepted as statistically significant.

## 4 5 6 **Result**

7 All of the scheduled hospitalization was cancelled and emergency admission was solely  
8 accepted during the first 60 day after the earthquake at Japanese Red Cross Ishinomaki Hospital.  
9 1,769 patients admitted to the hospital, and 322 of them were hospitalized for respiratory  
10 disease during the study period. In the corresponding period, total number of unscheduled  
11 hospitalization was 850 and that for respiratory disease was 99 in 2009 and 1,030 and 105 in  
12 2010. Patients hospitalized for respiratory disease accounted for 18.2% of total hospitalization  
13 during the study period. This proportion was significantly higher than that of 2009 and 2010  
14 (11.6% in 2009.  $P < 0.001$ . 10.2% in 2010.  $P < 0.001$ ). While the number of total hospitalizations  
15 of this period in 2011 was about twice of that in 2009 and 2010, hospitalization for respiratory  
16 disease in 2011 reached about three times or more than that of 2009 and 2010. The total number  
17 of hospitalizations was peaked in the first ten days, but the number of hospitalization for  
18 respiratory disease kept increasing for 20 days (Figure 1A and B).

19 We compared the number and proportion of patients hospitalized for respiratory disease  
20 between 2011, 2010, and 2009 study periods (Figure 2). Pneumonia was the most frequent  
21 disease ( $n=190$ , 59.0%), followed by AE-COPD ( $n=53$ , 16.5%), attack of asthma ( $n=27$ , 8.4%),  
22 and progression of lung cancer ( $n=22$ , 6.8%). One case of AE-COPD and seven cases of attack  
23 of asthma were physician's diagnosis. Category "Others" included pneumothorax, restrictive  
24 thoracic disease, pleural effusion, influenza, drowning, primary pulmonary hypertension,  
25 requirement of mechanical ventilator support for neuromuscular disease, and so on. One patient  
26 diagnosed as pneumonia was complicated by attack of asthma and two patients of pneumonia  
27 exacerbated their symptom of COPD. They were treated for both conditions and counted as  
28 pneumonia. In comparison with the past two years, the increase in number of hospitalizations  
29 was the largest for pneumonia, followed by AE-COPD and attack of asthma. The number of  
30 hospitalization for progression of lung cancer and that for "others" were not so different from  
31 the past two years. 39.4% of patients were hospitalized from emergency shelters.

32 To investigate the disease specific effect of earthquake, age and sex of each disease were  
33 compared between the study period in 2011 and the corresponding period in the past two years.  
34 The mean age of patients hospitalized for respiratory disease was significantly higher in 2011  
35 than in the past two years ( $75.7 \pm 12.5$  v.s.  $73.2 \pm 13.4$  years old.  $p=0.03$ ). Male proportion tended  
36 to be lower in 2011 than in the past two years (59.6% in 2011, 67.2% in 2010 and 2009.  $p=0.08$ ).



1 Specifically, pneumonia patients and AE-COPD patients were significantly older in 2011 study  
2 period than in 2010 and 2009 corresponding period(77.6±11.8 v.s. 74.3±12.8 years old in  
3 pneumonia patients. p=0.03. 76.0±8.7 v.s. 69.5±15.9 years old in AE-COPD patients. p=0.03).  
4 Male population of AE-COPD was significantly higher (81.1% v.s. 50.0%. p=0.01), whereas  
5 that of asthma attack significantly lower in 2011 period than 2010 and 2009 periods (18.5% v.s.  
6 54.6%. p=0.03).

7 Actual numbers of hospitalization for the main respiratory diseases in terms of every ten day  
8 bins during the study period is shown in Figure 3. Pneumonia peaked in the second 10 day bin.  
9 Following pneumonia, AE-COPD and attack of asthma peaked in the third 10 day  
10 bin. Progression of lung cancer had its peak in the fifth 10 day bin.

11 Next, we investigated ADL at hospitalization and ADL before the disaster among the patients  
12 hospitalized in 2011 study period. Because of confusing situation of medical activities after the  
13 disaster, ADL was not recorded in 11 patients At hospitalization, 195 patients (60.5%) were  
14 “dependent” and 54 patients (16.7%) were “partially dependent”. On the other hand, before  
15 earthquake, only 86 patients (26.7%) were “dependent” and 51 patients (15.8%) were “partially  
16 dependent”. To investigate the impact of ADL and its deterioration on admission for pulmonary  
17 disease in terms of time after the disaster, we counted the number of the patients who were  
18 “originally dependent”, “newly dependent”, or “independent throughout” during 60 days  
19 presented in 10 day bins (Figure 4). Throughout the study period, majority of patients were  
20 dependent or partially dependent patient. In the first 20 days, the majority of admissions were  
21 for originally dependent people. After 30days, there was a sharp increase in newly dependent  
22 people, as assessed by ADL. Independent patients were hospitalized mainly during first 20  
23 days.

24 Table 1 showed the association of ADL category (independent throughout, newly dependent,  
25 and originally dependent) with patient’s age, sex, and diagnosis. Regarding diagnosis, ratio of  
26 each disease was calculated in each category. Eleven patients whose ADL was not completely  
27 recorded were excluded from the data. Young and male patients were more frequent in order of  
28 independent, newly dependent and originally dependent. On investigation in patient’s diagnosis,  
29 the proportion of pneumonia and progression of lung cancer increased in the same order, while  
30 the proportion of AE-COPD and asthma decreased.

31

32

### 33 Discussion

### 34 Summary

35 In this retrospective descriptive and cross-sectional study, we found substantial increase in  
36 elderly patients hospitalized for respiratory disease after the earthquake and tsunami. Pneumonia,

1 AE-COPD, and attack of asthma were apparently increased after earthquake. Mean age of  
2 patients hospitalized for respiratory disease after the earthquake was significantly higher than  
3 that of corresponding periods of the past two years. Majority of patients had poor ADL and  
4 many of them experienced deterioration of ADL after the earthquake.

### 5 6 **Effect on respiratory disease**

7 Previous reports on Hanshin-Awaji earthquake showed initial rush of patients with injury and  
8 following increase of patients with respiratory disease, especially pneumonia<sup>11-13</sup>. Similarly, our  
9 observation showed marked increase in pneumonia patients, although initial rush of heavy  
10 injury patients was absent in this disaster because majority of victims were drowned to death  
11 and heavily injured patients were seldom carried to the hospital.

12 The cause of increase in respiratory disease was different in each situation. After the 2004  
13 Sumatra-Andaman earthquake and following tsunami, the number of lower respiratory infection  
14 in Aceh was rapidly increased after the disaster and sharply declined in the second week<sup>14</sup>. On  
15 the other hand, after the 1995 Hanshin-Awaji earthquake, the number of patients hospitalized for  
16 pneumonia was gradually increased and kept high proportion over the two month<sup>9 10</sup>. This  
17 difference is ascribable to the mechanism of developing pneumonia. In Sumatra-Andaman  
18 earthquake, many of pneumonia were resulted from aspiration of tsunami-water in  
19 near-drowning events<sup>15 16</sup>. Those pneumonias were called “tsunami lung”. On the other hand, in  
20 the Hanshin-Awaji earthquake, many patients developed pneumonia in shelters under unhealthy  
21 environment and most of them were in elderly. Those pneumonias were called “shelter  
22 pneumonia”<sup>17</sup>. In this earthquake and tsunami, we experienced few number of pneumonia  
23 directly caused by aspiration of tsunami-water even in the very acute period. A few of the  
24 patient directory came from the field, instead, most patients came from shelters, their own or  
25 relative’s homes, other hospitals, or nursing homes. The mean age of them was significantly  
26 higher than that of 2010 and 2009. Therefore, we regarded most of pneumonia we treated as the  
27 same kind of “shelter pneumonia”.

28 AE-COPD was also remarkably increased. COPD was one of the most common chronic  
29 respiratory diseases, especially in elderly people. It is well known that interruption of treatment  
30 for chronic disease will frequently exacerbate patient’s condition, and it is also true after a  
31 natural disaster<sup>14 18-20</sup>. Many patients lost their drugs by tsunami flooding, therefore, interruption  
32 of regular medication may partly account for the increase in hospitalization by AE-COPD.  
33 Sunny and windy days lasted from the end of March and dust from the tsunami sludge was an  
34 important component of particulate air pollution; it may have contributed to the significant  
35 increase in hospitalization by AE-COPD.

36 Although asthma was also one of the most common chronic respiratory diseases and had the

1 same precipitating cause with COPD, attack of asthma was not so much increased as AE-COPD.  
2 This difference might be caused by two important differences between asthma and COPD. First,  
3 generally, patients of COPD were older than those of asthma. Therefore, baseline health  
4 condition of patients of COPD would be poorer than that of asthma<sup>21</sup>. As a result, COPD  
5 patients required more frequent hospitalization. In our study, mean age of AE-COPD was higher  
6 than that of attack of asthma as well. Second, bacterial respiratory infection affects patients with  
7 COPD more than those with asthma<sup>22</sup>. In the aftermath of earthquake, loss of hygiene and  
8 overcrowding in the shelter could increase the risk of respiratory bacterial infection and cause  
9 AE-COPD.

10 Hospitalization for lung cancer related symptoms did not increase much and its ratio to total  
11 hospitalization for respiratory diseases rather declined. Mean age of lung cancer patients was  
12 similar to that in the past two years. Maeda et al. also reported that no increase in lung cancer  
13 related hospitalization was observed after Hanshin-Awaji earthquake<sup>23</sup>. Progression of lung  
14 cancer may not be influenced by environment as much as cancer growth itself. So, the disaster  
15 will not impact on lung cancer immediately. Although the interruption of chemotherapy and/or  
16 radiotherapy would worsen the prognosis, it cannot be confirmed during our study period.

#### 17 18 **Effect on ADL**

19 In acute phase, patients with poor ADL, especially those originally dependent, were hospitalized  
20 for pulmonary diseases, typically pneumonia, although substantial number of good ADL  
21 patients was also hospitalized. After 3 weeks, there was a sharp increase in newly dependent  
22 people who deteriorated their ADL after the disaster. It was reported that physical disability was  
23 an independent risk factor for death in Hanshin-Awaji earthquake and the 1999 Taiwan  
24 earthquake<sup>9 10</sup>. However, those reports investigated the mortality in acute phase, not  
25 hospitalization in subacute or chronic phase. After the earthquake and tsunami, one fourth of  
26 people in Ishinomaki region fled into shelters, many of which were also flooded by tsunami.  
27 They lacked water and food under harsh condition of cold season without heating in  
28 overcrowded quarter just letting them lie on the floor without beds. In such bad conditions,  
29 elderly people were restricted their consumption food and water, and kept still in a small space,  
30 resulting in deterioration of ADL. In addition, scarcity of water worsened oral hygiene. Both  
31 poor functional status and loss of oral hygiene were the major risk factor of pneumonia<sup>24-27</sup>,  
32 especially in elderly people. Subsequently, many elderly people were hospitalized for “shelter  
33 pneumonia” after the earthquake. Also, poor oral hygiene induces swallowing dysfunction<sup>28</sup> and  
34 swallowing dysfunction could be a risk factor of exacerbation of COPD<sup>29</sup>. It would be one of the  
35 reasons why AE-COPD increased especially in elderly people.

36

### 1 **Effect on aging society**

2 According to the report of government of Japan, 93% of the fatalities were drowning and more  
3 than 60% of them were over 60 years old in the Great East Japan earthquake. Although it was  
4 reported by many previous reports that elderly people had a greater risk of death after the  
5 earthquake, the proportion of the elderly killed by this earthquake and tsunami was extremely  
6 high in comparison to other major earthquake or tsunami in the world<sup>4-8</sup>. Similar finding was  
7 reported only in 1995 Hanshin-Awaji earthquake and 2004 Mid Niigata earthquake in Japan<sup>12,17</sup>.  
8 Moreover, 90.8% of the patients hospitalized for respiratory disease after the earthquake were  
9 over 60 years old in our study. These results suggest that elderly people were vulnerable not  
10 only immediately after the earthquake but also for a while after the earthquake.

11 In 1999 Taiwan earthquake, 2003 heat waves in the Czech Republic, and 2004  
12 Sumatra-Andaman earthquake, it is demonstrated that these disasters has left decreased  
13 mortality in the stricken area, resulted from a large number of direct death by disasters among a  
14 vulnerable population such as elderly people or children<sup>5, 30, 31</sup>, called “harvesting effect”.  
15 However, our observation suggests that, in the aging society, a huge disaster not only directly  
16 kills the vulnerable people but also produces new vulnerable people. Previous reports  
17 demonstrated that prolonged harmful influence on mental health and psychological slow  
18 recovery were seen more frequently in the elderly people than young people<sup>32-35</sup>. Therefore, we  
19 should pay a long-term attention on those elderly people after a disaster.

### 21 **Implications for policy and practice**

22 Our observation suggests two important targets for reducing hospitalization for respiratory  
23 disease after the major disaster in aging society. One target is interruption of treatment for  
24 chronic respiratory disease and the other target is deterioration of ADL. Interruption of  
25 treatment for chronic respiratory disease was preventable by storing the drugs for a few days.  
26 However, it is necessary to establish the system of valid storage to grasp regional prescription  
27 data of each drug and patient’s personal medication data. Telemedicine system or web-based  
28 patient data storage system might be useful. Prevention of deterioration of ADL is also  
29 important. Elderly people are potentially vulnerable and easily deteriorate their ADL. In our  
30 study, remaining at shelters in stricken area for more than three weeks led increase in  
31 deterioration of ADL and hospitalization for respiratory diseases. Therefore, we propose to  
32 evacuate elderly people out of the stricken area as soon as possible.

### 34 **Strengths and weaknesses of study**

35 Our study had two important strengths. First, the Great East Japan Earthquake hit one of the  
36 most rapidly aging societies in the world<sup>3</sup>. As the proportion of elderly people continues to

1 increase in not only developed but also developing countries, there is an urgent need of  
2 information and analysis on the aging society to plan countermeasures against it. Our study will  
3 give lessons against natural disaster to all the countries. Secondly, we obtained detailed data of  
4 patient's demographics, diagnosis, and ADL in a catastrophic situation. It is because that our  
5 hospital has kept its medical function, including electronic medical record system or laboratory  
6 systems, while devastating earthquake and tsunami hit Ishinomaki city and almost all medical  
7 facilities lost their function, and that staffs in our hospital has trained for the coming earthquake  
8 and has had an strong motivation to record our experiences as memos or on digital recorders for  
9 future disaster medicine.

10 Our study is single center study. This might be weakness of our study, but our hospital was the  
11 only functional hospital after the earthquake in Ishinomaki medical zone which account for  
12 more than 30% of total fatalities of this earthquake in Japan. Also, it has been the only hospital  
13 which has the department of respiratory medicine and pulmonary specialists in the medical zone.  
14 Even in the ordinary time before the disaster, it accepted almost all of the serious patients with  
15 pulmonary diseases who needed hospitalization. Therefore, we think our study well represents  
16 impact of the earthquake on pulmonary diseases and describes what happened in the hospital  
17 which faced the earthquake at the front<sup>2</sup>. It is also weakness of our study that we analyzed only  
18 hospitalized patients. There were a great number of outpatients and a heavy loss of lives. These  
19 events will be analyzed in the future report. Another weakness of our study is that  
20 cross-sectional study cannot elucidate a causal relationship. Finally, we did not clearly define  
21 the condition of hospitalization. Because the destruction of ordinary healthcare system and poor  
22 hygiene outside the hospital, we hospitalized some patients who could be treated in outpatient  
23 setting in ordinary time. However, this was a real situation after devastating disaster.

## 24 25 **Conclusion**

26 The Great East Japan earthquake and following tsunami hit the one of the most rapidly aging  
27 society in the world. After the disaster, pneumonia, exacerbation of COPD, bronchial asthma  
28 attack associated with bad ADL in the elderly provoked the most part of increase in  
29 hospitalization for pulmonary diseases. These observations should be exploited in constructing  
30 emergency medical management for disasters in progressive rapidly aging society.

## 31 32 **Acknowledgement**

33 We would like to express our gratitude to all of the relief teams and volunteers from all area of  
34 Japan and foreign countries for their kind and warm supports. We also thank doctors, nurses,  
35 and other employees in Japanese Red Cross Ishinomaki Hospital.

36 **Competing interests:** None declared.

1 **Ethical approval:** Approval of ethical review committee of Japanese Red Cross Ishinomaki  
2 Hospital was obtained.

3 **Contributors:** SY was responsible for study design and interpretation of the data, and drafted  
4 the manuscript. MH, SK, HS, ST, and MY were responsible for collection and interpretation of  
5 the data. KN drafted the statistical analysis part in the manuscript, and provided suggestions on  
6 public health and epidemiology. MH, SK and MY were responsible for study design and revised  
7 the drafted manuscript. SY, MH, SK, HS, ST and MY treated the patients. All authors approved  
8 the final version of the manuscript.

9 **Data sharing statement:** There is no additional data available.

10 **Funding:** This study was not funded by any research funds.

## 11 12 **References**

- 13 1. McCurry J. Japan: the aftermath. *Lancet* 2011;**377**:1061-1062.
- 14 2. National Police Agency. *Dmage Situation and Police Countermeasure*.  
15 [www.npa.go.jp/archive/keibi/biki/index\\_e.htm](http://www.npa.go.jp/archive/keibi/biki/index_e.htm) (accessed 29 Dec 2011).
- 16 3. Tamiya N, Noguchi H, Nishi A, *et al*. Population ageing and wellbeing: lessons from Japan's  
17 long-term care insurance policy. *Lancet* 2011;**378**:1183-1192.
- 18 4. Liang NJ, Shih YT, Shih FY, *et al*. Disaster epidemiology and medical response in the  
19 Chi-Chi earthquake in Taiwan. *Ann Emerg Med* 2001;**38**:549-555.
- 20 5. Chan CC, Lin YP, Chen HH, *et al*. A population-based study on the immediate and prolonged  
21 effects of the 1999 Taiwan earthquake on mortality. *Ann Epidemiol* 2003;**13**:502-508.
- 22 6. Nishikiori N, Abe T, Costa DG, *et al*. Who died as a result of the tsunami? Risk factors of  
23 mortality among internally displaced persons in Sri Lanka: a retrospective cohort analysis. *BMC*  
24 *Public Health* 2006;**6**:73.
- 25 7. Rofi A, Doocy S, Robinson C. Tsunami mortality and displacement in Aceh province,  
26 Indonesia. *Disasters* 2006;**30**:340-350.
- 27 8. Doocy S, Rofi A, Moodie C, *et al*. Tsunami mortality in Aceh Province, Indonesia. *Bull*  
28 *World Health Organ* 2007;**85**:273-278.
- 29 9. Chou YJ, Huang N, Lee CH, *et al*. Who is at risk of death in an earthquake? *Am J Epidemiol*  
30 2004;**160**:688-695.
- 31 10. Osaki Y, Minowa M. Factors associated with earthquake deaths in the great Hanshin-Awaji  
32 earthquake, 1995. *Am J Epidemiol* 2001;**153**:153-156.
- 33 11. Takakura R, Himeno S, Kanayama Y, *et al*. Follow-up after the Hanshin-Awaji earthquake:  
34 diverse influences on pneumonia, bronchial asthma, peptic ulcer and diabetes mellitus. *Intern*  
35 *Med* 1997;**36**:87-91.
- 36 12. Tanaka H, Oda J, Iwai A, *et al*. Morbidity and mortality of hospitalized patients after the

- 1  
2  
3  
4  
5 1 1995 Hanshin-Awaji earthquake. *Am J Emerg Med* 1999;**17**:186-191.
- 6 2 13. Matsuoka T, Yoshioka T, Oda J, *et al*. The impact of a catastrophic earthquake on morbidity  
7 3 rates for various illnesses. *Public Health* 2000;**114**:249-253.
- 8 4 14. Guha-Sapir D, van Panhuis WG. Health impact of the 2004 Andaman Nicobar earthquake  
9 5 and tsunami in Indonesia. *Prehosp Disaster Med* 2009;**24**:493-499.
- 10 6 15. Chierakul W, Winothai W, Wattanawaitunechai C, *et al*. Melioidosis in 6 tsunami survivors  
11 7 in southern Thailand. *Clin Infect Dis* 2005;**41**:982-990.
- 12 8 16. Potera C. In disaster's wake: tsunami lung. *Environ Health Perspect* 2005;**113**:A734.
- 13 9 17. Tanida N. What happened to elderly people in the great Hanshin earthquake. *BMJ*  
14 10 1996;**313**:1133-1135.
- 15 11 18. Guha-Sapir D, van Panhuis WG, Lagoutte J. Short communication: patterns of chronic and  
16 12 acute diseases after natural disasters - a study from the International Committee of the Red  
17 13 Cross field hospital in Banda Aceh after the 2004 Indian Ocean tsunami. *Trop Med Int Health*  
18 14 2007;**12**:1338-1341.
- 19 15 19. Miller AC, Arquilla B. Chronic diseases and natural hazards: impact of disasters on diabetic,  
20 16 renal, and cardiac patients. *Prehosp Disaster Med* 2008;**23**:185-194.
- 21 17 20. Tomita K, Hasegawa Y, Watanabe M, *et al*. The Totton-Ken Seibu earthquake and  
22 18 exacerbation of asthma in adults. *J Med Invest* 2005;**52**:80-84.
- 23 19 21. Soriano JB, Davis KJ, Coleman B, *et al*. The proportional Venn diagram of obstructive lung  
24 20 disease: two approximations from the United States and the United Kingdom. *Chest*  
25 21 2003;**124**:474-481.
- 26 22 22. Pauwels RA. Similarities and differences in asthma and chronic obstructive pulmonary  
27 23 disease exacerbations. *Proc Am Thorac Soc* 2004;**1**:73-76.
- 28 24 23. Maeda H, Nakagawa M, Yokoyama M. Hospital admissions for respiratory diseases in the  
29 25 aftermath of the great Hanshin earthquake[Article in Japanese]. *Nihon Kyobu Shikkan Gakkai*  
30 26 *Zasshi* 1996;**34**:164-173.
- 31 27 24. El-Solh AA, Pietrantonio C, Bhat A, *et al*. Microbiology of severe aspiration pneumonia in  
32 28 institutionalized elderly. *Am J Respir Crit Care Med* 2003;**167**:1650-1654.
- 33 29 25. Loeb MB, Becker M, Eady A, Walker-Dilks C. Interventions to prevent aspiration  
34 30 pneumonia in older adults: a systematic review. *J Am Geriatr Soc* 2003;**51**:1018-1022.
- 35 31 26. Langmore SE, Skarupski KA, Park PS, *et al*. Predictors of aspiration pneumonia in nursing  
36 32 home residents. *Dysphagia* 2002;**17**:298-307.
- 37 33 27. Terpenning MS, Taylor GW, Lopatin DE, *et al*. Aspiration pneumonia: dental and oral risk  
38 34 factors in an older veteran population. *J Am Geriatr Soc* 2001;**49**:557-563.
- 39 35 28. Yoshino A, Ebihara T, Ebihara S, *et al*. Daily oral care and risk factors for pneumonia  
40 36 among elderly nursing home patients. *JAMA* 2001;**286**:2235-2236.

- 1  
2  
3  
4  
5 1 29. Kobayashi S, Kubo H, Yanai M. Impairment of swallowing in COPD. *Am J Respir Crit*  
6 2 *Care Med* 2009;**180**:481.  
7  
8 3 30. Nishikiori N, Abe T, Costa DG, *et al.* Timing of mortality among internally displaced  
9 4 persons due to the tsunami in Sri Lanka: cross sectional household survey. *BMJ*  
10 5 2006;**332**:334-335.  
11 6 31. Kysely J, Kriz B. Decreased impacts of the 2003 heat waves on mortality in the Czech  
12 7 Republic: an improved response? *Int J Biometeorol* 2008;**52**:733-745.  
13 8 32. Toyabe S, Shioiri T, Kuwabara H, *et al.* Impaired psychological recovery in the elderly after  
14 9 the Niigata-Chuetsu Earthquake in Japan:a population-based study. *BMC Public Health*  
15 10 2006;**6**:230.  
16 11 33. Seplaki CL, Goldman N, Weinstein M, *et al.* Before and after the 1999 Chi-Chi earthquake:  
17 12 traumatic events and depressive symptoms in an older population. *Soc Sci Med*  
18 13 2006;**62**:3121-3132.  
19 14 34. Ueki A, Morita Y, Miyoshi K. Changes in symptoms after the great Hanshin Earthquake in  
20 15 patients with dementia[Article in Japanese]. *Nihon Ronen Igakkai Zasshi* 1996;**33**:573-579.  
21 16 35. Maeda K, Kakigi T. Manifestation of the symptoms in demented patients after the Great  
22 17 Hanshin Earthquake in Japan[Article in Japanese]. *Seishin Shinkeigaku Zasshi*  
23 18 1996;**98**:320-328.  
24 19  
25 20  
26 21  
27 22  
28 23  
29 24  
30 25  
31 26  
32 27  
33 28  
34 29  
35 30  
36 31  
37 32  
38 33  
39 34  
40 35  
41 36  
42  
43  
44  
45  
46  
47  
48  
49  
50  
51  
52  
53  
54  
55  
56  
57  
58  
59  
60



1 **Table**

2 Table 1. Association of ADL with patient's characteristics and respiratory disease.

3

|             | Independent<br>n=70 | Newly<br>dependent<br>n=104 | Originally<br>dependent<br>n=137 |
|-------------|---------------------|-----------------------------|----------------------------------|
| Age         | 69.9±15.1           | 73.1±11.2                   | 80.3±10.5                        |
| Male        | 49 (70.0)           | 63 (60.6)                   | 69 (50.4)                        |
| Diagnosis   |                     |                             |                                  |
| Pneumonia   | 31 (44.3)           | 59 (56.7)                   | 94 (68.6)                        |
| AE-COPD     | 17 (24.3)           | 17 (16.4)                   | 15 (11.0)                        |
| Asthma      | 11 (15.7)           | 11 (10.6)                   | 5 (3.7)                          |
| Lung cancer | 3 (4.3)             | 6 (5.8)                     | 12 (8.8)                         |
| Others      | 8 (11.4)            | 11 (8.0)                    | 11 (8.0)                         |

4 AE-COPD, acute exacerbation of COPD.

5 Data are mean ±SD for numerical variables and number (%) for categorical variables.

6

7

8

9

10

11

12

13

14

15

16

17

18

19

20

21

22

23

24

25

1  
2  
3  
4  
5  
6  
7  
8  
9  
10  
11  
12  
13  
14  
15  
16  
17  
18  
19  
20  
21  
22  
23  
24  
25  
26  
27  
28  
29  
30  
31  
32  
33  
34  
35  
36  
37  
38  
39  
40  
41  
42  
43  
44  
45  
46  
47  
48  
49  
50  
51  
52  
53  
54  
55  
56  
57  
58  
59  
60

1 **Figure legends**

2 Figure 1. The number of unscheduled hospitalization for all causes (A) and for respiratory  
3 disease (B) from March 11 to May 9 in 2009, 2010 and 2011, presented in 10 day bins.

4  
5 Figure 2. The number and proportion of patients hospitalized for respiratory disease from March  
6 11 to May 9 in 2009, 2010, and 2011, presented in 10 day bins.

7  
8 Figure 3. Distribution of patients hospitalized for respiratory disease after the Great East Japan  
9 earthquake from March 11 to May 9 in 2011, presented in 10 day bins.

10  
11 Figure 4. Influence of the disaster on ADL status and its deterioration in hospitalized patients for  
12 respiratory disease from March 11 to May 9 in 2011, presented in 10 day bins.

1  
2  
3  
4  
5  
6  
7  
8  
9  
10  
11  
12  
13  
14  
15  
16  
17  
18  
19  
20  
21  
22  
23  
24  
25  
26  
27  
28  
29  
30  
31  
32  
33  
34  
35  
36  
37  
38  
39  
40  
41  
42  
43  
44  
45  
46  
47  
48  
49  
50  
51  
52  
53  
54  
55  
56  
57  
58  
59  
60**Title**

The impact of the 2011 Great East Japan Earthquake on hospitalization for respiratory disease in advanced rapidly aging society: a retrospective descriptive and cross-sectional study at the disaster base hospital in Ishinomaki

**Author names**

Shinsuke Yamanda *physician scientist*<sup>1</sup>, Masakazu Hanagama *physician scientist*<sup>1</sup>, Seiichi Kobayashi *senior physician scientist*<sup>1</sup>, Hikari Satou *resident*<sup>1</sup>, Shinsaku Tokuda *lecturer*<sup>2</sup>, Kaijun Niu *associate professor*<sup>3</sup>, Masaru Yanai *director*<sup>1</sup>

<sup>1</sup>Department of respiratory medicine, Japanese Red Cross Ishinomaki Hospital, 71 Hebita Aza Nishimichishita, Ishinomaki, Miyagi, Japan

<sup>2</sup>Division of Cell Biology, Kobe University Graduate School of Medicine, 7-5-1 Kusunoki-cho, chuo-ku, Kobe, Hyogo, Japan

<sup>3</sup>Division of Biomedical Engineering for Health and Welfare, Tohoku University Graduate School of Biomedical Engineering, 2-1 Seiryomachi, Aoba-ku, Sendai, Miyagi, Japan

**Correspondence to:** Shinsuke Yamanda [syamanda@gmail.com](mailto:syamanda@gmail.com)

Formatted

1  
2  
3  
4  
5  
6  
7  
8 **Article summary**

9  
10 **Article focus**

11 The Great East Japan Earthquake attacked one of the most ~~advanced~~rapidly aging  
12 societies in the world. Respiratory medicine is the major field in gerontology. Here we  
13 address how seriously the disaster affected respiratory diseases in the most heavily  
14 stricken area, which has one of the highest ratios of elderly people in Japan.

15 The study gives lessons against natural disasters and aging society.

16  
17 **Key messages**

18 After the earthquake and tsunami, admission from pneumonia and exacerbation of chronic  
19 respiratory disease in elderly increased.

20 Harsh conditions and poor ADL after the disaster may be associated with increase in  
21 hospitalization for respiratory diseases in elderly people.

22  
23 **Strengths and limitations of study**

24 We could obtain detailed data of patient even in ~~the~~ catastrophic state.

25 We analyzed only hospitalized patients. But there were a great number of outpatients  
26 as well as heavy loss of lives.  
27  
28  
29  
30  
31  
32  
33  
34  
35  
36  
37  
38  
39  
40  
41  
42  
43  
44  
45  
46  
47  
48  
49  
50  
51  
52  
53  
54

## Abstract

### Objective

To investigate the impact of the 2011 Great East Japan earthquake on hospitalization for respiratory disease at the disaster base hospital in aging society.

### Design

Descriptive and cross sectional study.

### Setting

Emergency care in Japanese Red Cross Ishinomaki Hospital, a regional disaster base hospital, Miyagi, Japan.

### Participants

322 emergency patients who hospitalized for respiratory disease from March 11 to May 9 in 2011, and ~~99 and 105~~204 emergency patients who hospitalized in the corresponding ~~time~~-period of 2009 and 2010, respectively.

### Main outcome measures

Description and comparison of patient's characteristics and disease distribution in terms of age, time after the disaster, and activity of daily living (ADL).

### Results

Total ~~number of patients hospitalized in our hospital in the study period was 1769 (1,769~~850 in 2009, 1030 in 2010), and the ~~patients admitted to our hospital, and number of hospitalized for respiratory disease in them was 322 (99 in 2009, 105 in 2010). 322 of them were hospitalized for respiratory disease during the first 60 days after the earthquake. Mean age of patient was 75.7±12.5 years old. Among admission for pulmonary diseases, p~~pneumonia was the most frequent disease (n=190, 59.0%), followed by acute exacerbation of chronic obstructive disease (AE-COPD) (n=53, 16.5%), attack of asthma (n=27, 8.4%), and progression of lung cancer (n=22, 6.8%). Compared with the corresponding period of 2009 or 2010, increase in absolute number of hospitalization was the highest for pneumonia, followed by AE-COPD and attack of asthma. ~~Elderly patients were more likely hospitalized after the earthquake, especially for pneumonia and AE-COPD.~~ At hospitalization, 195 patients were "dependent" and 54 patients were "partially dependent". Respiratory admission accompanied by deterioration ~~Deterioration~~ of ADL after the disaster was more frequent in elderly and female patients.

~~The mean age was 73.1±11.2 years old in the patients with deterioration of ADL and 69.9±15.1 in the patients without deterioration of ADL. The male proportion was 60.6% in the patients with deterioration of ADL and 70% in the patients without deterioration of ADL.~~

### Conclusions

After the Great East Japan Earthquake, admission for pneumonia and exacerbation of chronic respiratory disease in elderly increased at the disaster base hospital.

## Introduction

On March 11, 2011, at 2:46 pm Japan time, the Pacific coast of Japan's Tohoku (northeastern) region was struck by the massive earthquake (The Great East Japan Earthquake), measuring magnitude 9.0 on the Richter scale<sup>1</sup>. The earthquake triggered a devastating tsunami which destroyed many towns and villages near the seashore. The epicenter was estimated to be about 70 kilometers east of Oshika Peninsula of Ishinomaki in Miyagi. Officially, over 19,000 people were killed or missing and the maximum number of refugees reached more than 550,000<sup>2</sup>.

Ishinomaki city, located in Pacific coast of Honshu Island, suffered from the largest number of victims in Japan, 3,280 people were killed and 669 people were still missing. A great number of casualties, more than 10,000 patients in the first 30 days, were treated at Japanese Red Cross Ishinomaki Hospital, a regional disaster base hospital in Ishinomaki which uniquely preserved its hospital function in Ishinomaki region ~~during and after the disaster~~.

Japan is one of the most ~~rapidly advanced~~ aging society in the world. 23% of Japanese citizens were ~~age 65 or overyears old or more~~ in 2010<sup>3</sup>. ~~Especially~~, Tohoku region is ~~especially rapidly a highly advanced~~ aging society in Japan, 26.6% of people living in Ishinomaki city were ~~age 65 or overyears old or more~~ in 2010<sup>4</sup>. Although several reports showed the significant association between age and earthquake and tsunami death<sup>4-8</sup>, there were few reports investigating the impact of a tremendous disaster on ~~elderly peoples in-~~ such an aging society<sup>9</sup><sup>10</sup>.

Respiratory diseases are common in ~~the elderly people~~ even in ordinary times. So, investigating the impact of the disasters on respiratory health will contribute to elucidating the problem of aging society. Thus, we performed retrospective descriptive and cross-sectional analysis of the medical and epidemiologic data of the patient ~~requiringrequired~~ hospitalization for respiratory disease after the Great East Japan Earthquake and following tsunami.

## Methods

This study was a retrospective descriptive and cross-sectional analysis of the data obtained from

1  
2  
3  
4  
5  
6  
7  
8  
9  
10  
11  
12  
13  
14  
15  
16  
17  
18  
19  
20  
21  
22  
23  
24  
25  
26  
27  
28  
29  
30  
31  
32  
33  
34  
35  
36  
37  
38  
39  
40  
41  
42  
43  
44  
45  
46  
47  
48  
49  
50  
51  
52  
53  
54  
55  
56  
57  
58  
59  
60

1 the medical records at Japanese Red Cross Ishinomaki Hospital. We reviewed medical records  
2 of patients admitted to the hospital for respiratory diseases during the first 60 days after the  
3 Great East Japan Earthquake, when the hospital solely accepted emergency patients. We also  
4 reviewed medical records of patients who required unscheduled hospitalization for respiratory  
5 disease in the corresponding period of 2009 and 2010.  
6 Japanese Red Cross Ishinomaki Hospital which had 402 beds for inpatients was located at 4.5  
7 km inland from Pacific Ocean. It has covered about 220,000 people living in its medical zone  
8 (Ishinomaki City, Onagawa Town, ~~or~~ and Higashi-matsushima City) and assigned to a regional  
9 disaster base hospital. It has ~~received~~accepted almost all of the emergency respiratory patients  
10 even in the ordinary time before the disaster, because it ~~is~~has been the unique hospital having  
11 the respiratory department and pulmonary specialists in the region.  
12 Medical records were investigated in terms of date of admission, age, sex, diagnosis. We also  
13 investigated ~~activities~~activity of daily living (ADL) at hospitalization and ADL before  
14 earthquake, and their residence before admission on the medical record of 2011 study period.  
15 For comparison, the total number of unscheduled hospitalization ~~to the hospital~~ during the  
16 corresponding periods in 2009 and 2010 was counted.  
17 Pneumonia was defined as the presence of the infiltration on chest radiograph along with one or  
18 more of the following symptoms or signs: fever, cough, sputum production, breathlessness,  
19 pleuritic chest pain or signs consistent with pneumonia on auscultation.  
20 Chronic obstructive pulmonary disease (COPD) and bronchial asthma were detected by the  
21 previous spirometric data, patient's self-report, or physician's diagnosis made by patient's  
22 history, physical examination, and radiological finding. An acute exacerbation of  
23 COPD(AE-COPD) was defined as an increase in or new onset of more than one symptom of  
24 COPD (cough, sputum, wheezing, dyspnea or chest tightness) without pneumonia or  
25 pneumothorax. An attack of asthma was defined as the presentation of wheezes or severe cough  
26 in asthma patients without pneumonia. Progression of lung cancer was defined as requirement  
27 for admission for lung cancer associated condition such as dehydration, respiratory failure, or  
28 uncontrolled pain. Obstructive pneumonia due to lung cancer was considered as progression of  
29 lung cancer. Chest trauma and traumatopnea were not considered as respiratory disease but  
30 chest injury.  
31 ADL was assessed by the information from a patient, patient's family, or patient's caregiver, and  
32 classified into three categories; "independent" who could live without particular support,  
33 "partially dependent" who could not leave their residence without any support, "dependent"  
34 who spent a day on the bed or the wheelchair and lost the ability to move for themselves.  
35 ~~Furthermore~~To investigate the impact of the disaster on ADL, we defined as "originally  
36 dependent" who were dependent or partially dependent before the disaster, and as "newly

1 dependent” who became dependent or partially dependent after the disaster.

#### 2 3 4 **Data analysis**

5 All data were entered into a personal computer and analyzed using Microsoft™ Excel software  
6 and statistical analysis was performed using JMP9 (SAS Institute Inc., Cary, NC, USA). A  
7 missing value in medical record was treated as “unknown”. Results were given as mean ± SD  
8 for numerical variables and as proportions for categorical variables. To analyze sequential  
9 change of the effect of the disaster, we divided 60 days of study period into six groups of ~~each~~  
10 ten days bins. To investigate the risk of hospitalization for respiratory disease after the  
11 earthquake and tsunami, we compared the patient’s characteristics of 2011 study period with the  
12 ~~that of combined data of 2010 and 2009~~ 2009 and 2010 corresponding period as ordinary time.  
13 We used two-sided Student’s *t*-test for numerical variables and chi-square test for the categorical  
14 variables. ~~We calculated the effect of age and sex on the odds ratio for hospitalization for~~  
15 ~~respiratory disease after the earthquake by logistic regression models.~~The  $p < 0.05$  is accepted  
16 as statistically significant.

#### 17 18 19 **Result**

20 All of the scheduled hospitalization was cancelled and emergency admission was solely  
21 accepted during the first 60 day after the earthquake at Japanese Red Cross Ishinomaki Hospital.  
22 1,769 patients admitted to the hospital, and 322 of them were hospitalized for respiratory  
23 disease during the study period. ~~Patients hospitalized for respiratory disease accounted for~~  
24 ~~18.2% of total hospitalization during the study period.~~In the corresponding period, total number  
25 of unscheduled hospitalization was 850 and that for respiratory disease was 99 in 2009 and  
26 1,030 and 105 in 2010. Patients hospitalized for respiratory disease accounted for 18.2% of total  
27 hospitalization during the study period. This proportion was significantly higher than that of  
28 2009 and 2010 (11.6% in 2009.  $P < 0.001$ . 10.2% in 2010.  $P < 0.001$ ).~~the corresponding period of~~  
29 ~~past two years, 10.2% of 2010 and 11.6% of 2009.~~ While the number of total hospitalizations  
30 of this period in 2011 was about twice of that in 2009 and 2010, hospitalization for respiratory  
31 disease in 2011 reached about three times or more than that of 2009 and 2010. The total number  
32 of hospitalizations was at peak peaked in the first ten days ~~and then decreased~~, but the number of  
33 hospitalization for respiratory disease kept increasing for 20 days (Figure 1A and B).

34  
35 We compared the number and proportion of patients hospitalized for respiratory diseasedisease  
36 distribution between 2011, 2010, and 2009 study periods (Figure 2). Pneumonia was the most



1 frequent disease (n=190, 59.0%), followed by AE-COPD (n=53, 16.5%), attack of asthma (n=27,  
 2 8.4%), and progression of lung cancer (n=22, 6.8%). One case of AE-COPD and seven cases of  
 3 attack of asthma were physician's diagnosis. Category "Others" included pneumothorax,  
 4 restrictive thoracic disease, pleural effusion, influenza, drowning, primary pulmonary  
 5 hypertension, requirement of mechanical ventilator support for neuromuscular disease, and so  
 6 on. One patient diagnosed as pneumonia was complicated by attack of asthma and two patients  
 7 of pneumonia exacerbated their symptom of COPD. They were treated for both conditions and  
 8 counted as pneumonia. In comparison with the past two years, the increase in ~~absolute~~ number  
 9 of hospitalizations was the largest for pneumonia, followed by AE-COPD and attack of asthma.  
 10 The number of hospitalization for progression of lung cancer and that for ~~"others" diseases~~ were  
 11 not so ~~deferent~~ different from the past two years. 39.4% of patients ~~were hospitalized from~~ stayed  
 12 ~~at~~ emergency shelters ~~before hospitalization~~.

14 To investigate the disease specific effect of earthquake, age and sex of each disease were  
 15 compared between the study period in 2011 and the corresponding period in the past two years  
 16 (Table 1). The mean age of patients hospitalized for respiratory disease was significantly higher  
 17 in 2011 than in the past two years (75.7±12.5 years old v.s. in 2011, 73.2±13.4 years old in 2010  
 18 and 2009, p=0.03). Male proportion tended to be lower in 2011 than in the past two years  
 19 (59.6% in 2011, 67.2% in 2010 and 2009, p=0.08). Specifically, pneumonia patients and  
 20 AE-COPD patients were significantly older in 2011 study period than in 2010 and 2009  
 21 corresponding period (77.6±11.8 v.s. 74.3±12.8 years old in pneumonia patients, p=0.03,  
 22 76.0±8.7 v.s. 69.5±15.9 years old in AE-COPD patients, ~~and~~ p=0.03, ~~respectively~~). Male  
 23 population of AE-COPD was significantly higher (81.1% v.s. 50.0%, p=0.01), whereas that of  
 24 ~~attack of asthma~~ attack significantly lower in 2011 period than 2010 and 2009 periods (18.5%  
 25 v.s. 54.6%, p=0.01 and p=0.03, ~~respectively~~).

26 ~~Furthermore, the effect of age and sex on the odds ratio for hospitalization with respiratory~~  
 27 ~~disease was calculated (Table 2). We found older patients were more likely hospitalized after the~~  
 28 ~~earthquake, especially for pneumonia and AE-COPD. Male patients were more likely~~  
 29 ~~hospitalized for AE-COPD and less likely hospitalized for attack of asthma.~~

31 Actual numbers of hospitalization for the main respiratory diseases in terms of every ten days  
 32 bins during the study period is shown in Figure 3. Pneumonia ~~presented its peak~~ peaked in the  
 33 second period 10 day bin. Following pneumonia, AE-COPD and attack of asthma ~~presented its~~  
 34 peak peaked in the third 10 day bin ~~period~~, ~~and~~ ~~p~~ Progression of lung cancer had its peak in the  
 35 fifth 10 day bin ~~period~~. ~~Attack of asthma had small peak in the same third period as AECOPD.~~

1  
2  
3  
4  
5  
6  
7  
8  
9  
10  
11  
12  
13  
14  
15  
16  
17  
18  
19  
20  
21  
22  
23  
24  
25  
26  
27  
28  
29  
30  
31  
32  
33  
34  
35  
36  
37  
38  
39  
40  
41  
42  
43  
44  
45  
46  
47  
48  
49  
50  
51  
52  
53  
54  
55  
56  
57  
58  
59  
60

1 Next, we investigated ADL at hospitalization and ADL before the disaster among the patients  
2 hospitalized in 2011 study period. Because of confusing situation of medical activities after the  
3 disaster, ~~ADL was not recorded in 11 patients-ADL before the disaster, ADL at hospitalization,~~  
4 ~~and both ADL were not recorded in 8, 1, and 2 patients, respectively. Six of them were~~  
5 ~~hospitalized for pneumonia and remaining five patients were hospitalized for AE-COPD. At~~  
6 hospitalization, 195 patients (60.5%) were “dependent” and 54 patients (16.7%) were “partially  
7 dependent”. ~~Those patients accounted for 76.9 % of the patients hospitalized after the~~  
8 ~~earthquake.~~ On the other hand, before earthquake, only 86 patients (26.7%) were “dependent”  
9 and 51 patients (15.8%) were “partially dependent”. ~~Those patients accounted for 42.5% of~~  
10 ~~hospitalized patients after the earthquake. To investigate the impact of ADL and its deterioration~~  
11 ~~on admission for pulmonary disease in terms of time after the disaster, we we analyze sequential~~  
12 ~~change incounted~~ the number of the patients who were “originally dependent”, “newly  
13 dependent”, or “independent throughout” at hospitalization during 60 days presented in 10 day  
14 bins (Figure 4). Throughout the study period, majority of patients were dependent or partially  
15 dependent patient. ~~In the first 20 days, the majority of admissions were for originally dependent~~  
16 ~~people. After 30days, there was a sharp increase in newly dependent people, as assessed by~~  
17 ~~ADL. Originally dependent patients were hospitalized especially in early period (first and second~~  
18 ~~periods), and newly dependent patients showed its keen peak of hospitalization in the third~~  
19 ~~period, the day from 21 to 30 after the earthquake, and kept high incidence of admission~~  
20 ~~thereafter.~~ Independent patients were hospitalized mainly during first 20 days.

21  
22  
23  
24  
25  
26  
27  
28  
29  
30  
31  
32  
33  
34  
35  
36  
37  
38  
39  
40  
41  
42  
43  
44  
45  
46  
47  
48  
49  
50  
51  
52  
53  
54  
55  
56  
57  
58  
59  
60

Table 13 showed the association of ADL category (independent throughout, newly dependent, and originally dependent) with patient’s age, sex, and diagnosis. Regarding diagnosis, ratio of each disease was calculated in each category. Eleven patients whose ADL was not completely recorded were excluded from the data. Young and male patients were more frequent in order of independent, newly dependent and originally dependent. On investigation in patient’s diagnosis, the proportion of pneumonia and progression of lung cancer increased in the same order, while the proportion of AE-COPD and asthma decreased.

## Discussion

### Summary

In this retrospective descriptive and cross-sectional study, we found substantial increase in elderly patients hospitalized for respiratory disease after the earthquake and tsunami. Pneumonia, AE-COPD, and attack of asthma were apparently increased after earthquake. Mean age of

1 patients hospitalized for respiratory disease after the earthquake was significantly higher than  
2 that of ~~ordinary years~~corresponding periods of the past two years. Majority of patients had poor  
3 ADL and many of them experienced deterioration of ADL after the earthquake.  
4

#### 5 6 **Effect on respiratory disease**

7 Previous reports on Hanshin-Awaji earthquake showed initial rush of patients with injury and  
8 following increase of patients with respiratory disease, especially pneumonia<sup>11-13</sup>. Similarly, our  
9 observation showed marked increase in pneumonia patients, although initial rush of heavy  
10 injury patients was absent in this disaster because majority of victims were ~~drown~~drowned  
11 death and heavily injured patients were seldom carried to the hospital.

12 The cause of increase in respiratory disease was different in each situation. After the 2004  
13 Sumatra-Andaman earthquake and following tsunami, the number of lower respiratory infection  
14 in Aceh was rapidly increased after the disaster and sharply declined in the second week<sup>14</sup>. On  
15 the other hand, after the 1995 Hanshin-Awaji earthquake, the number of patients hospitalized for  
16 pneumonia was gradually increased and kept high proportion over the two month<sup>9 10</sup>. This  
17 difference is ascribable to the mechanism of developing pneumonia. In Sumatra-Andaman  
18 earthquake, many of pneumonia were resulted from aspiration of tsunami-water in  
19 near-drowning events<sup>15 16</sup>. Those pneumonias were called “tsunami lung”. On the other hand, in  
20 the Hanshin-Awaji earthquake, many patients developed pneumonia in shelters under unhealthy  
21 environment and most of them were in elderly. Those pneumonias were called “shelter  
22 pneumonia”<sup>17</sup>. In this earthquake and tsunami, we experienced few number of pneumonia  
23 directly caused by aspiration of tsunami-water even in the very acute period. ~~Most patients came~~  
24 ~~from their own or relative’s home, other hospital, nursing home, or shelter, and a~~ few of the  
25 patient directory came from the field, instead, most patients came from shelters, their own or  
26 relative’s homes, other hospitals, or nursing homes. The mean age of them was significantly  
27 higher than that of 2010 and 2009. Therefore, we ~~thought~~regarded most of pneumonia we  
28 treated ~~was~~as the same kind of “shelter pneumonia”.

29 AE-COPD was also remarkably increased. COPD was one of the most common chronic  
30 respiratory diseases, especially in elderly people. It is well known that interruption of treatment  
31 for chronic disease will easilyfrequently exacerbate patient’s condition, and it is also true after a  
32 natural disaster<sup>14 18-20</sup>. Many patients lost their drugs by tsunami flooding, therefore, interruption  
33 of regular medication may partly account for the increase in hospitalization by AE-COPD.  
34 Sunny and windy days lasted from the end of March and dust from the tsunami sludge was an  
35 important component of particulate air pollution; it may have contributed to the significant  
36 increase in ~~We also speculate that air pollution caused by tsunami dust may raise the~~

1 hospitalization by AE-COPD. ~~After cold and snowy weather for ten days from the disaster,~~  
2 ~~cold, sunny, and windy days covered over Ishinomaki region, and dense dust containing tsunami~~  
3 ~~sediment floated in the air for the following three weeks.~~

4 Although asthma was also one of the most common chronic respiratory diseases and had the  
5 same precipitating cause with COPD, attack of asthma was not so much increased as AE-COPD.  
6 This difference might be caused by two important differences between asthma and COPD. First,  
7 generally, patients of COPD were older than those of asthma. Therefore, baseline health  
8 condition of patients of COPD would be poorer than that of asthma<sup>21</sup>. As a result, COPD  
9 patients required more frequent hospitalization. In our study, mean age of AE-COPD was higher  
10 than that of attack of asthma as well. Second, bacterial respiratory infection affects patients with  
11 COPD more than those with asthma<sup>22</sup>. In the aftermath of earthquake, loss of hygiene and  
12 overcrowding in the shelter could increase the risk of respiratory bacterial infection and cause  
13 AE-COPD.

14 ~~Hospitalization for lung~~ Lung cancer related ~~symptoms~~ hospitalization did not increase much and  
15 its ratio to total hospitalization for respiratory diseases rather declined. Mean age of lung cancer  
16 patients was similar to that in the past two years. Maeda et al. also reported that no increase in  
17 lung cancer related hospitalization was observed after Hanshin-Awaji earthquake<sup>23</sup>. Progression  
18 of lung cancer may not be influenced by environment as much as cancer growth itself. So, the  
19 disaster will not impact on lung cancer immediately. Although the interruption of chemotherapy  
20 and/or radiotherapy would worsen the prognosis, it cannot be confirmed during our study  
21 period.

#### 22 23 **Effect on ADL**

24 ~~Our observation demonstrated that drastic deterioration of ADL after the disaster resulted in~~  
25 ~~increase in hospitalization by respiratory diseases.~~ In acute phase, patients with poor ADL,  
26 especially ~~those~~ originally dependent ~~ones~~, were hospitalized for pulmonary diseases, typically  
27 pneumonia; although substantial number of good ADL patients was also hospitalized. After 3 ~~or~~  
28 4 weeks, ~~there was a sharp increase in newly dependent people~~ many people who deteriorated  
29 their ADL ~~after the disaster~~ (newly dependent) ~~were hospitalized for pulmonary diseases.~~ It was  
30 reported that physical disability was an independent risk factor for death in Hanshin-Awaji  
31 earthquake and the 1999 Taiwan earthquake<sup>9 10</sup>. However, those reports investigated the  
32 mortality in acute phase, not hospitalization in subacute or chronic phase. After the earthquake  
33 and tsunami, one fourth of people in Ishinomaki region fled into shelters, many of which were  
34 also flooded by tsunami. They lacked water and food under harsh condition of cold season  
35 without heating in overcrowded ~~room~~ quarter just letting them lie on the floor without beds. In  
36 such bad conditions, elderly people ~~were~~ restricted their consumption food and water, and kept

1  
2  
3  
4  
5  
6  
7  
8 still in ~~one~~ small space; ~~as a result, they deteriorated their~~ resulting in deterioration of ADLs. In  
9  
10 addition, scarcity of water worsened oral hygiene. Both poor functional status and loss of oral  
11  
12 hygiene were the major risk factor of pneumonia<sup>24-27</sup>, especially in elderly people.  
13  
14 Subsequently, many elderly people were hospitalized for “shelter pneumonia” after the  
15  
16 earthquake. Also, poor oral hygiene induces swallowing dysfunction<sup>28</sup> and swallowing  
17  
18 dysfunction could be a risk factor of exacerbation of COPD<sup>29</sup>. It would be one of the reasons  
19  
20 why AE-COPD increased especially in elderly people.

### 21 22 23 24 25 26 27 28 29 30 31 32 33 34 35 36 37 38 39 40 41 42 43 44 45 46 47 48 49 50 51 52 53 54 55 56 57 58 59 60

### Effect on aging society

10 According to the report of government of Japan, 93% of the fatalities were drowning and more  
11  
12 than 60% of them were over 60 years old ~~or more~~ in the Great East Japan earthquake. Although  
13  
14 it was reported by many previous reports that elderly people had a greater risk of death after the  
15  
16 earthquake, the proportion of the elderly—people killed by this earthquake and tsunami was  
17  
18 extremely high in comparison to other major earthquake or tsunami in the world<sup>4-8</sup>. Similar  
19  
20 finding was reported only in 1995 Hanshin-Awaji earthquake and 2004 Mid Niigata earthquake  
21  
22 in Japan<sup>12 17</sup>. Moreover, 90.8% of the patients hospitalized for respiratory disease after the  
23  
24 earthquake were over 60 years old ~~or more~~ in our study. These results suggested that elderly  
25  
26 people were vulnerable not only immediately after the earthquake but also for a while after the  
27  
28 earthquake.

20 In 1999 Taiwan earthquake, 2003 heat waves in the Czech Republic, and 2004  
21  
22 Sumatra-Andaman earthquake, it is demonstrated that these disasters has left decreased  
23  
24 mortality in the stricken area, resulted from a large number of direct death by disasters among a  
25  
26 vulnerable population such as elderly people or children<sup>5 30 31</sup>, called “harvesting effect”.  
27  
28 However, our observation suggests that, in the aging society, a huge disaster not only directly  
29  
30 kills the vulnerable people but also newly produces new vulnerable people. Previous reports  
31  
32 demonstrated that prolonged harmful influence on mental health and psychological slow  
33  
34 recovery were seen more frequently in the elderly people than young people<sup>32-35</sup>. Therefore, we  
35  
36 should pay a long-term attention on those elderly people after a disaster.

### Implications for policy and practice

31 Our observation suggests two important targets for reducing hospitalization for respiratory  
32  
33 disease after the major disaster in aging society. One target is interruption of treatment for  
34  
35 chronic respiratory disease and the other target is deterioration of ADL. Interruption of  
36  
37 treatment for chronic respiratory disease was preventable by storing the drugs for a few days.  
38  
39 However, it is necessary to establish the system offer valid storage to grasp regional prescription  
40  
41 data of each drug and patient’s personal medication data. Telemedicine system or web-based  
42  
43

1 patient data storage system might be useful. Prevention of deterioration of ADL is also  
2 important. Elderly people ~~are~~ potentially vulnerable and easily deteriorate their ADL. In our  
3 study, remaining at shelters in stricken area for more than three weeks led increase in  
4 deterioration of ADL and hospitalization for respiratory diseases. Therefore, we propose to  
5 ~~transfer~~ evacuate elderly people ~~to~~ out of the stricken area as soon as possible.

### 6 7 **Strengths and weaknesses of study**

8 Our study had two important strengths. First, the Great East Japan Earthquake hit one of the  
9 most ~~advanced~~ rapidly aging societies in the world<sup>3</sup>. As the proportion of elderly people  
10 continues to increase in not only developed ~~countries~~ but also developing countries, there is an  
11 urgent need of information and analysis on the aging society to plan countermeasures against it.  
12 Our study will give lessons against natural disaster to all the countries. Secondly, we obtained  
13 detailed data of patient's demographics, diagnosis, and ADL in a catastrophic situation. It is  
14 because that our hospital has kept its medical function, including electronic medical record  
15 system or laboratory systems, while devastating earthquake and tsunami hit Ishinomaki city and  
16 almost all medical facilities lost their function, and that staffs in our hospital has trained for the  
17 coming earthquake and has had an strong motivation to record our experiences as memos or on  
18 digital recorders for future disaster medicine ~~for the future~~.

19 Our study is single center study. This might be weakness of our study, but our hospital was the  
20 only functional hospital after the earthquake in Ishinomaki medical zone which account for  
21 more than 30% of ~~total fatalities~~ victims of this earthquake in Japan. Also, it has been the only  
22 hospital which has the department of respiratory medicine and pulmonary specialists in the  
23 medical zone. Even in the ordinary time before the disaster, it accepted almost all of the serious  
24 patients with pulmonary diseases who needed hospitalization. Therefore, we think our study  
25 well represents impact of the earthquake on pulmonary diseases and describes what happened  
26 in the hospital which faced the earthquake at the front<sup>2</sup>. It is also weakness of our study that we  
27 analyzed only hospitalized patients. There were a great number of outpatients and a heavy loss  
28 of lives. These events will be analyzed in the future report. Another weakness of our study is  
29 that cross-sectional study cannot elucidate a causal relationship. Finally, we did not clearly  
30 define the condition of hospitalization. Because the destruction of ordinary healthcare system  
31 and poor hygiene outside the hospital, we hospitalized some patients who could be treated in  
32 outpatient setting in ordinary time. However, this was a real situation after devastating disaster.

### 33 34 **Conclusion**

35 The Great East Japan earthquake and following tsunami hit the one of the most ~~advanced~~ rapidly  
36 aging society in the world. After the disaster, pneumonia, exacerbation of COPD, bronchial

1  
2  
3  
4  
5  
6  
7  
8 | 1 | asthma attack associated with bad ADL in the elderly provoked the most part of increase in  
9 | 2 | hospitalization for pulmonary diseases. These observations should be exploited in constructing  
10 | 3 | emergency medical management for disasters in progressive advancedrapidly aging society.  
11  
12

#### 13 | 5 | **Acknowledgement**

14 | 6 | We would like to express our gratitude to all of the relief teams and volunteers from all area of  
15 | 7 | Japan and foreign countries for their kind and warm supports. We also thank doctors, nurses,  
16 | 8 | and other employees in Japanese Red Cross Ishinomaki Hospital.  
17

18 | 9 | **Competing interests:** None declared.

19 | 10 | **Ethical approval:** Approval of ethical review committee of Japanese Red Cross Ishinomaki  
20 | 11 | Hospital was obtained.

21 | 12 | **Contributors:** SY was responsible for study design and interpretation of the data, and drafted  
22 | 13 | the manuscript. MH, SK, HS, ST, and MY were responsible for collection and interpretation of  
23 | 14 | the data. KN drafted the statistical analysis part in the manuscript, and provided suggestions on  
24 | 15 | public health and epidemiology. MH, SK and MY were responsible for study design and revised  
25 | 16 | the drafted manuscript. SY, MH, SK, HS, ST and MY treated the patients. All authors approved  
26 | 17 | the final version of the manuscript.

27 | 18 | **Data sharing statement:** There is no additional data available.

28 | 19 | **Funding:** This study was not funded by any research funds.  
29  
30

#### 31 | 21 | **References**

- 32 | 22 | 1. McCurry J. Japan: the aftermath. *Lancet* 2011;**377**:1061-1062.  
33 | 23 | 2. National Police Agency. *Dmage Situation and Police Countermeasure*.  
34 | 24 | [www.npa.go.jp/archive/keibi/biki/index\\_e.htm](http://www.npa.go.jp/archive/keibi/biki/index_e.htm) (accessed 29 Dec 2011).  
35 | 25 | 3. Tamiya N, Noguchi H, Nishi A, *et al*. Population ageing and wellbeing: lessons from Japan's  
36 | 26 | long-term care insurance policy. *Lancet* 2011;**378**:1183-1192.  
37 | 27 | 4. Liang NJ, Shih YT, Shih FY, *et al*. Disaster epidemiology and medical response in the  
38 | 28 | Chi-Chi earthquake in Taiwan. *Ann Emerg Med* 2001;**38**:549-555.  
39 | 29 | 5. Chan CC, Lin YP, Chen HH, *et al*. A population-based study on the immediate and prolonged  
40 | 30 | effects of the 1999 Taiwan earthquake on mortality. *Ann Epidemiol* 2003;**13**:502-508.  
41 | 31 | 6. Nishikiori N, Abe T, Costa DG, *et al*. Who died as a result of the tsunami? Risk factors of  
42 | 32 | mortality among internally displaced persons in Sri Lanka: a retrospective cohort analysis. *BMC*  
43 | 33 | *Public Health* 2006;**6**:73.  
44 | 34 | 7. Rofi A, Doocy S, Robinson C. Tsunami mortality and displacement in Aceh province,  
45 | 35 | Indonesia. *Disasters* 2006;**30**:340-350.  
46 | 36 | 8. Doocy S, Rofi A, Moodie C, *et al*. Tsunami mortality in Aceh Province, Indonesia. *Bull*  
47  
48  
49  
50  
51  
52  
53  
54

- 1  
2  
3  
4  
5  
6  
7  
8  
9  
10  
11  
12  
13  
14  
15  
16  
17  
18  
19  
20  
21  
22  
23  
24  
25  
26  
27  
28  
29  
30  
31  
32  
33  
34  
35  
36  
37  
38  
39  
40  
41  
42  
43  
44  
45  
46  
47  
48  
49  
50  
51  
52  
53  
54  
55  
56  
57  
58  
59  
60
- 1 *World Health Organ* 2007;**85**:273-278.
- 2 9. Chou YJ, Huang N, Lee CH, *et al*. Who is at risk of death in an earthquake? *Am J Epidemiol*
- 3 2004;**160**:688-695.
- 4 10. Osaki Y, Minowa M. Factors associated with earthquake deaths in the great Hanshin-Awaji
- 5 earthquake, 1995. *Am J Epidemiol* 2001;**153**:153-156.
- 6 11. Takakura R, Himeno S, Kanayama Y, *et al*. Follow-up after the Hanshin-Awaji earthquake:
- 7 diverse influences on pneumonia, bronchial asthma, peptic ulcer and diabetes mellitus. *Intern*
- 8 *Med* 1997;**36**:87-91.
- 9 12. Tanaka H, Oda J, Iwai A, *et al*. Morbidity and mortality of hospitalized patients after the
- 10 1995 Hanshin-Awaji earthquake. *Am J Emerg Med* 1999;**17**:186-191.
- 11 13. Matsuoka T, Yoshioka T, Oda J, *et al*. The impact of a catastrophic earthquake on morbidity
- 12 rates for various illnesses. *Public Health* 2000;**114**:249-253.
- 13 14. Guha-Sapir D, van Panhuis WG. Health impact of the 2004 Andaman Nicobar earthquake
- 14 and tsunami in Indonesia. *Prehosp Disaster Med* 2009;**24**:493-499.
- 15 15. Chierakul W, Winothai W, Wattanawaitunechai C, *et al*. Melioidosis in 6 tsunami survivors
- 16 in southern Thailand. *Clin Infect Dis* 2005;**41**:982-990.
- 17 16. Potera C. In disaster's wake: tsunami lung. *Environ Health Perspect* 2005;**113**:A734.
- 18 17. Tanida N. What happened to elderly people in the great Hanshin earthquake. *BMJ*
- 19 1996;**313**:1133-1135.
- 20 18. Guha-Sapir D, van Panhuis WG, Lagoutte J. Short communication: patterns of chronic and
- 21 acute diseases after natural disasters - a study from the International Committee of the Red
- 22 Cross field hospital in Banda Aceh after the 2004 Indian Ocean tsunami. *Trop Med Int Health*
- 23 2007;**12**:1338-1341.
- 24 19. Miller AC, Arquilla B. Chronic diseases and natural hazards: impact of disasters on diabetic,
- 25 renal, and cardiac patients. *Prehosp Disaster Med* 2008;**23**:185-194.
- 26 20. Tomita K, Hasegawa Y, Watanabe M, *et al*. The Totton-Ken Seibu earthquake and
- 27 exacerbation of asthma in adults. *J Med Invest* 2005;**52**:80-84.
- 28 21. Soriano JB, Davis KJ, Coleman B, *et al*. The proportional Venn diagram of obstructive lung
- 29 disease: two approximations from the United States and the United Kingdom. *Chest*
- 30 2003;**124**:474-481.
- 31 22. Pauwels RA. Similarities and differences in asthma and chronic obstructive pulmonary
- 32 disease exacerbations. *Proc Am Thorac Soc* 2004;**1**:73-76.
- 33 23. Maeda H, Nakagawa M, Yokoyama M. Hospital admissions for respiratory diseases in the
- 34 aftermath of the great Hanshin earthquake[Article in Japanese]. *Nihon Kyobu Shikkan Gakkai*
- 35 *Zasshi* 1996;**34**:164-173.
- 36 24. El-Solh AA, Pietrantoni C, Bhat A, *et al*. Microbiology of severe aspiration pneumonia in



- 1  
2  
3  
4  
5  
6  
7  
8 institutionalized elderly. *Am J Respir Crit Care Med* 2003;**167**:1650-1654.
- 9  
10 25. Loeb MB, Becker M, Eady A, Walker-Dilks C. Interventions to prevent aspiration  
11 pneumonia in older adults: a systematic review. *J Am Geriatr Soc* 2003;**51**:1018-1022.
- 12  
13 26. Langmore SE, Skarupski KA, Park PS, *et al.* Predictors of aspiration pneumonia in nursing  
14 home residents. *Dysphagia* 2002;**17**:298-307.
- 15  
16 27. Terpenning MS, Taylor GW, Lopatin DE, *et al.* Aspiration pneumonia: dental and oral risk  
17 factors in an older veteran population. *J Am Geriatr Soc* 2001;**49**:557-563.
- 18  
19 28. Yoshino A, Ebihara T, Ebihara S, *et al.* Daily oral care and risk factors for pneumonia  
20 among elderly nursing home patients. *JAMA* 2001;**286**:2235-2236.
- 21  
22 29. Kobayashi S, Kubo H, Yanai M. Impairment of swallowing in COPD. *Am J Respir Crit*  
23 *Care Med* 2009;**180**:481.
- 24  
25 30. Nishikiori N, Abe T, Costa DG, *et al.* Timing of mortality among internally displaced  
26 persons due to the tsunami in Sri Lanka: cross sectional household survey. *BMJ*  
27 2006;**332**:334-335.
- 28  
29 31. Kysely J, Kriz B. Decreased impacts of the 2003 heat waves on mortality in the Czech  
30 Republic: an improved response? *Int J Biometeorol* 2008;**52**:733-745.
- 31  
32 32. Toyabe S, Shioiri T, Kuwabara H, *et al.* Impaired psychological recovery in the elderly after  
33 the Niigata-Chuetsu Earthquake in Japan:a population-based study. *BMC Public Health*  
34 2006;**6**:230.
- 35  
36 33. Seplaki CL, Goldman N, Weinstein M, *et al.* Before and after the 1999 Chi-Chi earthquake:  
37 traumatic events and depressive symptoms in an older population. *Soc Sci Med*  
38 2006;**62**:3121-3132.
- 39  
40 34. Ueki A, Morita Y, Miyoshi K. Changes in symptoms after the great Hanshin Earthquake in  
41 patients with dementia[Article in Japanese]. *Nihon Ronen Igakkai Zasshi* 1996;**33**:573-579.
- 42  
43 35. Maeda K, Kakigi T. Manifestation of the symptoms in demented patients after the Great  
44 Hanshin Earthquake in Japan[Article in Japanese]. *Seishin Shinkeigaku Zasshi*  
45 1996;**98**:320-328.
- 46  
47  
48  
49  
50  
51  
52  
53  
54  
55  
56  
57  
58  
59  
60

1  
2  
3  
4  
5  
6  
7  
8  
9  
10  
11  
12  
13  
14  
15  
16  
17  
18  
19  
20  
21  
22  
23  
24  
25  
26  
27  
28  
29  
30  
31  
32  
33  
34  
35  
36  
37  
38  
39  
40  
41  
42  
43  
44  
45  
46  
47  
48  
49  
50  
51  
52  
53  
54  
55  
56  
57  
58  
59  
60

1  
2  
3  
4  
5  
6  
7  
8  
9  
10  
11  
12  
13  
14  
15  
16  
17  
18  
19  
20  
21  
22

**Tables**

**Table 1. Demographics and patient characteristics in 2011 and past two years.**

|                  | After the earthquake (2011)<br>n=322 | Past two years (2010 and 2011)<br>n=204 | p-value |
|------------------|--------------------------------------|-----------------------------------------|---------|
| <b>All-cause</b> |                                      |                                         |         |
| age (year)       | 75.7±12.5*                           | 73.2±13.4                               | 0.03    |
| male             | 192 (59.6)                           | 137 (67.2)                              | 0.08    |
| <b>Pneumonia</b> |                                      |                                         |         |
| age              | 77.6±11.8*                           | 74.3±12.8                               | 0.03    |
| male             | 111 (58.4)                           | 63 (66.3)                               | 0.20    |
| <b>AE-COPD</b>   |                                      |                                         |         |
| age              | 76.0±8.7*                            | 69.3±15.9                               | 0.03    |
| male             | 43 (81.1)*                           | 8 (50.0)                                | 0.01    |
| <b>Asthma</b>    |                                      |                                         |         |
| age              | 68.7±19.7                            | 67.2±19.4                               | 0.83    |

Formatted: Justified

Formatted: Justified, Tab stops: Not at 2.95" + 5.91"

Formatted: Justified, Tab stops: Not at 2.95" + 5.91"

Formatted: Justified

Formatted: Justified, Indent: First line: 0 ch

Formatted: Justified

Formatted: Justified, Indent: First line: 0 ch

Formatted: Justified

Formatted: Justified

Formatted: Justified, Indent: First line: 0 ch

Formatted: Justified

Formatted: Justified, Indent: First line: 0 ch

Formatted: Justified

Formatted: Justified, Indent: First line: 0 ch

Formatted: Justified

Formatted: Justified, Indent: First line: 0 ch

Formatted: Justified

1  
2  
3  
4  
5  
6  
7  
8  
9  
10  
11  
12  
13  
14  
15  
16  
17  
18  
19  
20  
21  
22  
23  
24  
25  
26  
27  
28  
29  
30  
31  
32  
33  
34  
35  
36  
37  
38  
39  
40  
41  
42  
43  
44  
45  
46  
47  
48  
49  
50  
51  
52  
53  
54  
55  
56  
57  
58  
59  
60

|                    |           |           |      |
|--------------------|-----------|-----------|------|
| male               | 5 (18.5)* | 6 (54.6)  | 0.03 |
| <b>Lung cancer</b> |           |           |      |
| age                | 74.3±12.1 | 73.2±16.0 | 0.79 |
| male               | 16 (72.7) | 18 (66.7) | 0.65 |
| <b>Others</b>      |           |           |      |
| age                | 70.4±11.6 | 73.8±11.3 | 0.19 |
| male               | 17 (56.7) | 42 (76.4) | 0.06 |

AE-COPD, acute exacerbation of COPD.  
Data are mean±SD for numerical variables and number (%) for categorical variables. \*p<0.05.

- Formatted: Justified, Indent: First line: 0 ch
- Formatted: Justified
- Formatted: Justified, Tab stops: Not at 2.95" + 5.91"
- Formatted: Justified, Tab stops: Not at 2.95" + 5.91"
- Formatted: Justified
- Formatted: Justified, Indent: First line: 0 ch
- Formatted: Justified
- Formatted: Justified, Indent: First line: 0 ch
- Formatted: Justified
- Formatted: Justified, Indent: First line: 0 ch
- Formatted: Justified

~~Table 2. Association of age and sex with hospitalization for respiratory disease after the earthquake.~~

|                           | Hospitalization for respiratory disease after the earthquake |                       |
|---------------------------|--------------------------------------------------------------|-----------------------|
|                           | Unadjusted OR (95% CI)                                       | *Adjusted OR (95% CI) |
| <b>All-cause</b>          |                                                              |                       |
| —age (year)               | 1.01† (1.00-1.03)                                            | 1.02† (1.00-1.03)     |
| —male (reference: female) | 0.72 (0.50-1.04)                                             | 0.71 (0.19-1.03)      |
| <b>Pneumonia</b>          |                                                              |                       |
| —age                      | 1.02† (1.00-1.04)                                            | 1.02† (1.00-1.04)     |
| —male                     | 0.71 (0.42-1.19)                                             | 0.74 (0.44-1.23)      |
| <b>AE-COPD</b>            |                                                              |                       |
| —age                      | 1.05† (1.00-1.11)                                            | 1.05 (1.00-1.11)      |
| —male                     | 4.30† (1.30-14.66)                                           | 4.17 † (1.21-14.84)   |
| <b>Asthma</b>             |                                                              |                       |
| —age                      | 1.00 (0.97-1.04)                                             | 1.00 (0.96-1.05)      |
| —male                     | 0.19 † (0.04-0.85)                                           | 0.19 † (0.04-0.85)    |

|                    |                  |                  |
|--------------------|------------------|------------------|
| <b>Lung cancer</b> |                  |                  |
| —age               | 1.01 (0.97-1.05) | 1.00 (0.96-1.05) |
| —male              | 1.33 (0.39-4.76) | 1.30 (0.37-4.83) |
| <b>Others</b>      |                  |                  |
| —age               | 0.97 (0.94-1.01) | 0.97 (0.93-1.01) |
| —male              | 0.40 (0.15-1.05) | 0.39 (0.15-1.03) |

AE-COPD, acute exacerbation of COPD; OR, odds ratio; CI, confidence interval.

\*Adjusted for age and sex with each other. †p<0.05

Table 13. Association of ADL with patient's characteristics and respiratory disease.

|             | Independent<br>n=70 | Newly<br>dependent<br>n=104 | Originally<br>dependent<br>n=137 |
|-------------|---------------------|-----------------------------|----------------------------------|
| Age         | 69.9±15.1           | 73.1±11.2                   | 80.3±10.5                        |
| Male        | 49 (70.0)           | 63 (60.6)                   | 69 (50.4)                        |
| Diagnosis   |                     |                             |                                  |
| Pneumonia   | 31 (44.3)           | 59 (56.7)                   | 94 (68.6)                        |
| AE-COPD     | 17 (24.3)           | 17 (16.4)                   | 15 (11.0)                        |
| Asthma      | 11 (15.7)           | 11 (10.6)                   | 5 (3.7)                          |
| Lung cancer | 3 (4.3)             | 6 (5.8)                     | 12 (8.8)                         |
| Others      | 8 (11.4)            | 11 (8.0)                    | 11 (8.0)                         |

AE-COPD, acute exacerbation of COPD.

Data are mean ±SD for numerical variables and number (%) for categorical variables.

1  
2  
3  
4  
5  
6  
7  
8  
9  
10  
11  
12  
13  
14  
15  
16  
17  
18  
19  
20  
21  
22  
23  
24  
25  
26  
27  
28  
29  
30  
31  
32  
33  
34  
35  
36  
37  
38  
39  
40  
41  
42  
43  
44  
45  
46  
47  
48  
49  
50  
51  
52  
53  
54  
55  
56  
57  
58  
59  
60

#### Figure legends

Figure 1. ~~The number of unscheduled hospitalization~~Sequential change of the number of unscheduled hospitalization for all causes (A) and for respiratory disease (B) from March 11 to May 9 in 2009~~4~~, 2010 and 2011, presented in 10 day bins~~09~~.

Figure 2. The number and proportion of patients hospitalized for respiratory disease from March 11 to May 9 in 2009~~4~~, 2010, and 2011~~09~~, presented in 10 day bins.

Figure ~~\_~~3. ~~Distribution~~Sequential change of ~~disease distribution of~~ patients hospitalized for respiratory disease after the Great East Japan earthquake from March 11 to May 9 in 2011, presented in 10 day bins.

Figure 4. ~~Influence of the earthquake on the patient's ADL~~Influence of the disaster on ADL status and its deterioration in hospitalized patients for respiratory disease from March 11 to May 9 in 2011, presented in 10 day bins.

1  
2  
3  
4  
5  
6  
7  
8  
9  
10  
11  
12  
13  
14  
15  
16  
17  
18  
19  
20  
21  
22  
23  
24  
25  
26  
27  
28  
29  
30  
31  
32  
33  
34  
35  
36  
37  
38  
39  
40  
41  
42  
43  
44  
45  
46  
47  
48  
49  
50  
51  
52  
53  
54  
55  
56  
57  
58  
59  
60

1 |  
2

For peer review only

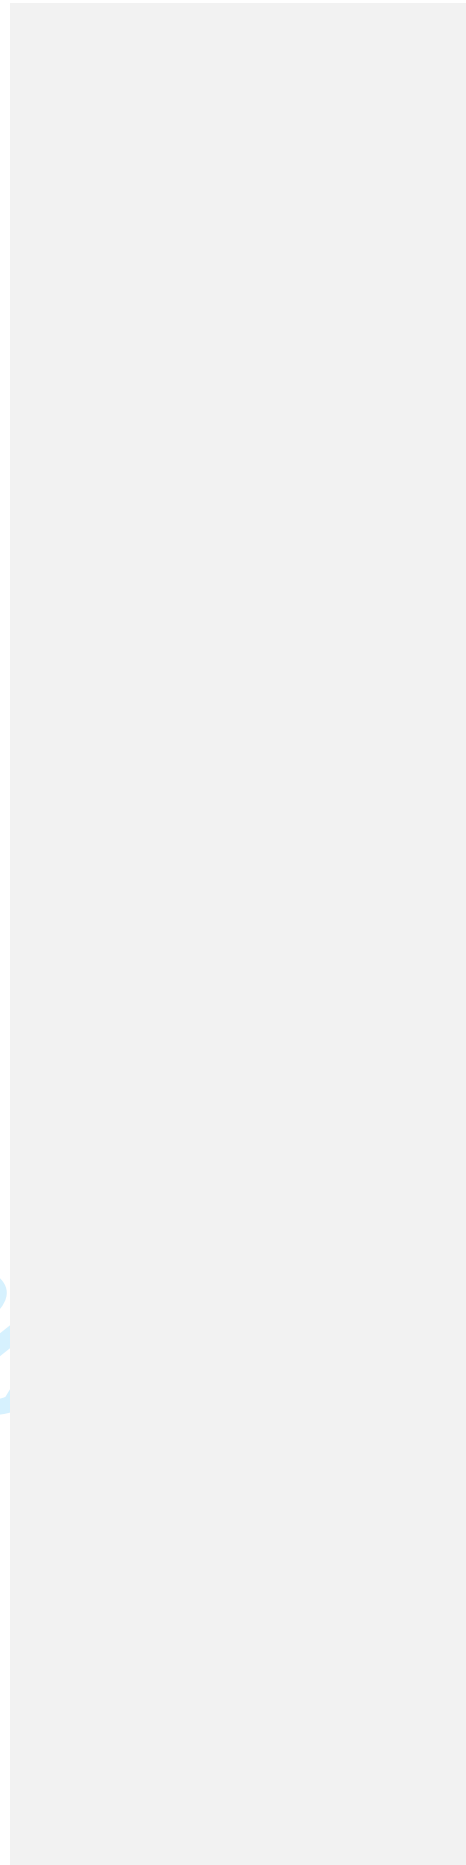

1  
2  
3  
4  
5  
6  
7  
8  
9  
10  
11  
12  
13  
14  
15  
16  
17  
18  
19  
20  
21  
22  
23  
24  
25  
26  
27  
28  
29  
30  
31  
32  
33  
34  
35  
36  
37  
38  
39  
40  
41  
42  
43  
44  
45  
46  
47  
48  
49  
50  
51  
52  
53  
54  
55  
56  
57  
58  
59  
60

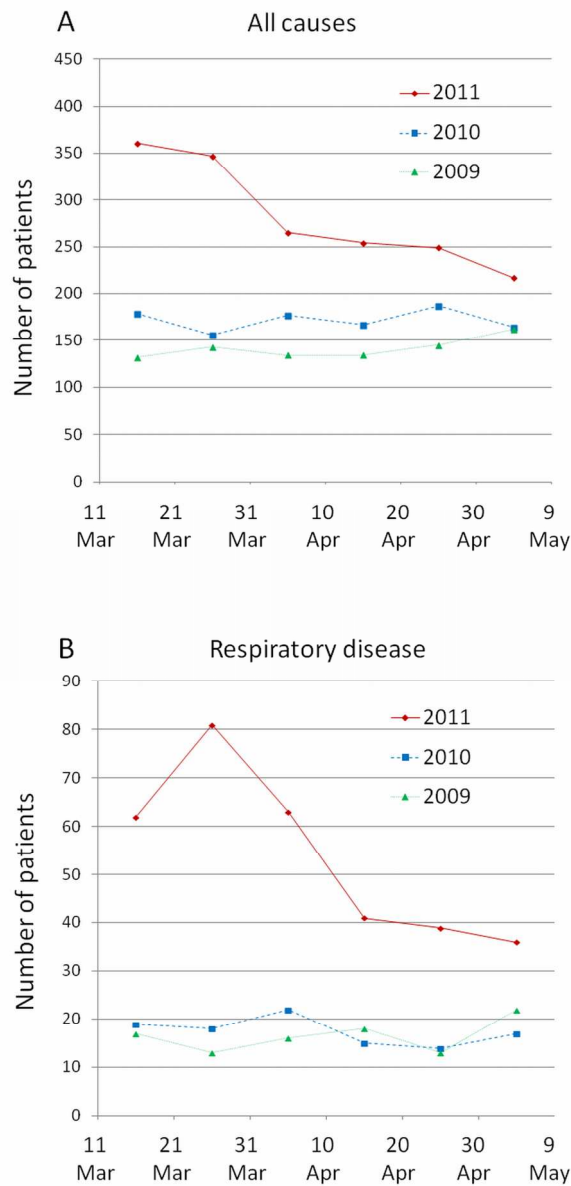

Figure 1. The number of unscheduled hospitalization for all causes (A) and for respiratory disease (B) from March 11 to May 9 in 2009, 2010 and 2011, presented in 10 day bins.  
90x185mm (300 x 300 DPI)

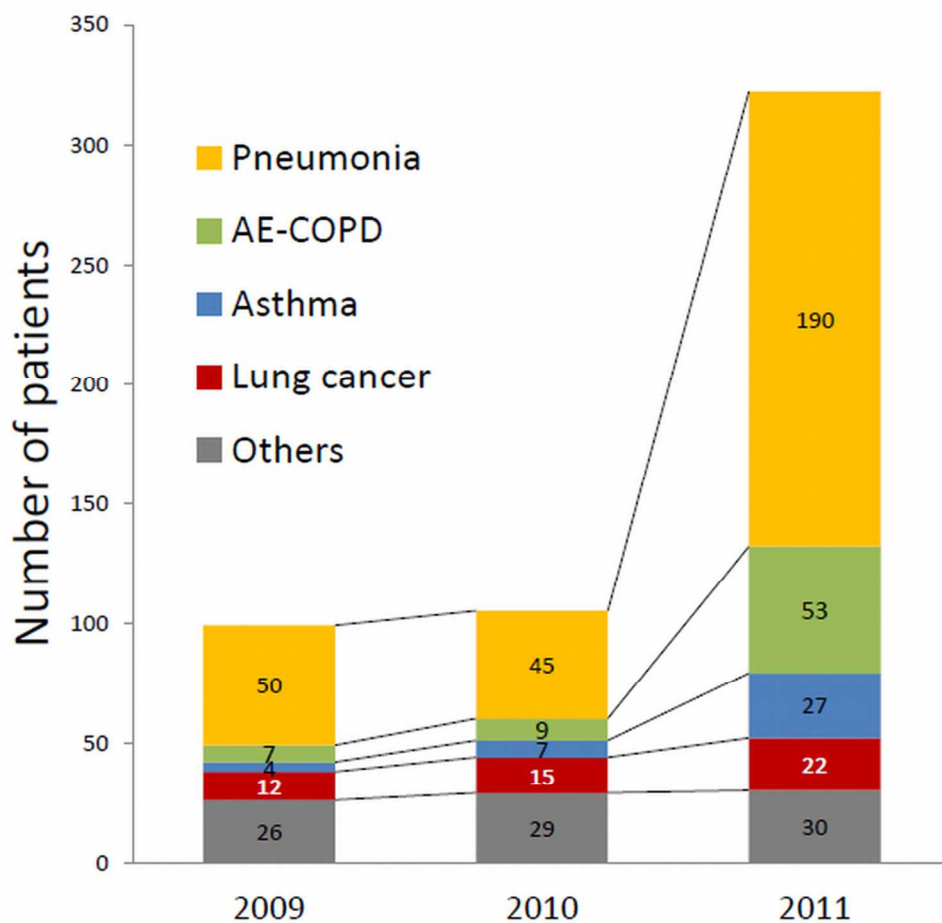

Figure 2. The number and proportion of patients hospitalized for respiratory disease from March 11 to May 9 in 2009, 2010, and 2011, presented in 10 day bins.  
90x91mm (300 x 300 DPI)

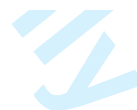



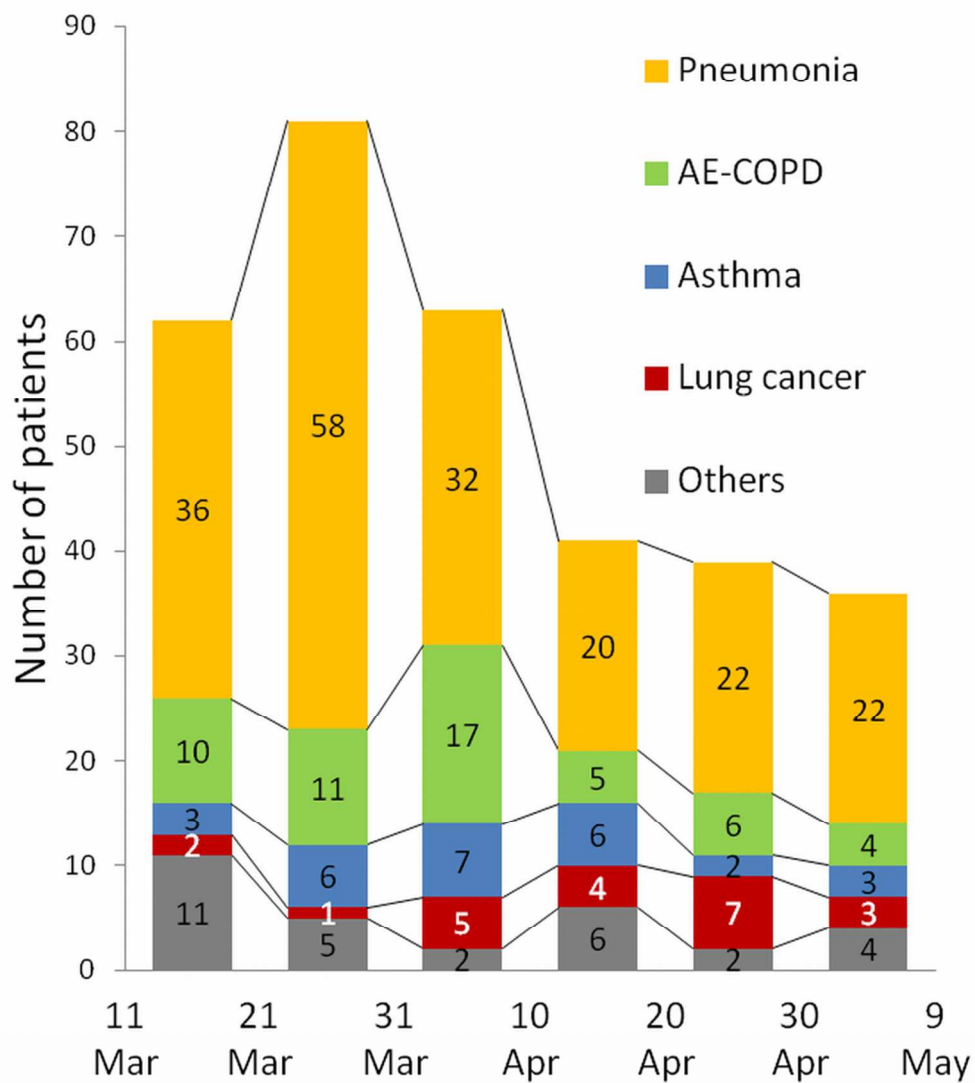

Figure 3. Distribution of patients hospitalized for respiratory disease after the Great East Japan earthquake from March 11 to May 9 in 2011, presented in 10 day bins.  
90x104mm (300 x 300 DPI)

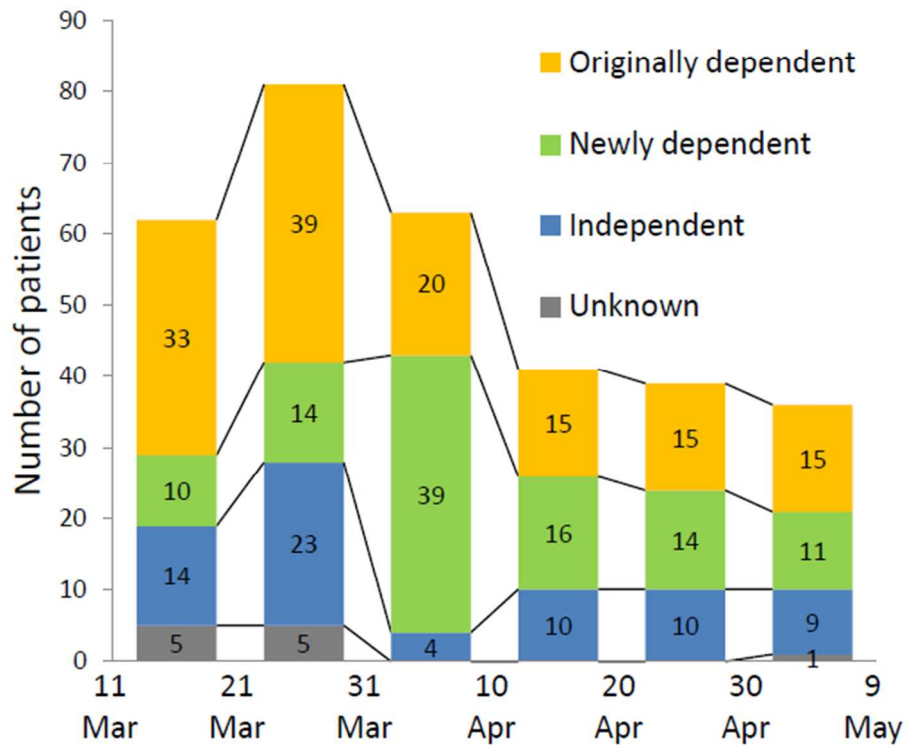

Figure 4. Influence of the disaster on ADL status and its deterioration in hospitalized patients for respiratory disease from March 11 to May 9 in 2011, presented in 10 day bins.

For peer review only

STROBE 2007 (v4) Statement—Checklist of items that should be included in reports of *cross-sectional studies*

| Section/Topic             | Item # | Recommendation                                                                                                                                                                       | Reported on page # |
|---------------------------|--------|--------------------------------------------------------------------------------------------------------------------------------------------------------------------------------------|--------------------|
| Title and abstract        | 1      | (a) Indicate the study’s design with a commonly used term in the title or the abstract                                                                                               | 1                  |
|                           |        | (b) Provide in the abstract an informative and balanced summary of what was done and what was found                                                                                  | 2, 3               |
| <b>Introduction</b>       |        |                                                                                                                                                                                      |                    |
| Background/rationale      | 2      | Explain the scientific background and rationale for the investigation being reported                                                                                                 | 3-4                |
| Objectives                | 3      | State specific objectives, including any prespecified hypotheses                                                                                                                     | 3-4                |
| <b>Methods</b>            |        |                                                                                                                                                                                      |                    |
| Study design              | 4      | Present key elements of study design early in the paper                                                                                                                              | 4-6                |
| Setting                   | 5      | Describe the setting, locations, and relevant dates, including periods of recruitment, exposure, follow-up, and data collection                                                      | 4-6                |
| Participants              | 6      | (a) Give the eligibility criteria, and the sources and methods of selection of participants                                                                                          | 4-6                |
| Variables                 | 7      | Clearly define all outcomes, exposures, predictors, potential confounders, and effect modifiers. Give diagnostic criteria, if applicable                                             | 4-6                |
| Data sources/ measurement | 8*     | For each variable of interest, give sources of data and details of methods of assessment (measurement). Describe comparability of assessment methods if there is more than one group | 4-6                |
| Bias                      | 9      | Describe any efforts to address potential sources of bias                                                                                                                            | -                  |
| Study size                | 10     | Explain how the study size was arrived at                                                                                                                                            | 4                  |
| Quantitative variables    | 11     | Explain how quantitative variables were handled in the analyses. If applicable, describe which groupings were chosen and why                                                         | 4, 5               |
| Statistical methods       | 12     | (a) Describe all statistical methods, including those used to control for confounding                                                                                                | 5, 6               |
|                           |        | (b) Describe any methods used to examine subgroups and interactions                                                                                                                  | -                  |
|                           |        | (c) Explain how missing data were addressed                                                                                                                                          | 7                  |
|                           |        | (d) If applicable, describe analytical methods taking account of sampling strategy                                                                                                   | -                  |
|                           |        | (e) Describe any sensitivity analyses                                                                                                                                                | -                  |
| <b>Results</b>            |        |                                                                                                                                                                                      |                    |

1  
2  
3  
4  
5  
6  
7  
8  
9  
10  
11  
12  
13  
14  
15  
16  
17  
18  
19  
20  
21  
22  
23  
24  
25  
26  
27  
28  
29  
30  
31  
32  
33  
34  
35  
36  
37  
38  
39  
40  
41  
42  
43  
44  
45  
46  
47  
48  
49

|                          |     |                                                                                                                                                                                                              |               |
|--------------------------|-----|--------------------------------------------------------------------------------------------------------------------------------------------------------------------------------------------------------------|---------------|
| Participants             | 13* | (a) Report numbers of individuals at each stage of study—eg numbers potentially eligible, examined for eligibility, confirmed eligible, included in the study, completing follow-up, and analysed            | 6             |
|                          |     | (b) Give reasons for non-participation at each stage                                                                                                                                                         | -             |
|                          |     | (c) Consider use of a flow diagram                                                                                                                                                                           | -             |
| Descriptive data         | 14* | (a) Give characteristics of study participants (eg demographic, clinical, social) and information on exposures and potential confounders                                                                     | 6-7 + Table 1 |
|                          |     | (b) Indicate number of participants with missing data for each variable of interest                                                                                                                          | 7             |
| Outcome data             | 15* | Report numbers of outcome events or summary measures                                                                                                                                                         | 3             |
| Main results             | 16  | (a) Give unadjusted estimates and, if applicable, confounder-adjusted estimates and their precision (eg, 95% confidence interval). Make clear which confounders were adjusted for and why they were included | 3 + Table 2   |
|                          |     | (b) Report category boundaries when continuous variables were categorized                                                                                                                                    | 5             |
|                          |     | (c) If relevant, consider translating estimates of relative risk into absolute risk for a meaningful time period                                                                                             | -             |
| Other analyses           | 17  | Report other analyses done—eg analyses of subgroups and interactions, and sensitivity analyses                                                                                                               | -             |
| <b>Discussion</b>        |     |                                                                                                                                                                                                              |               |
| Key results              | 18  | Summarise key results with reference to study objectives                                                                                                                                                     | 8             |
| Limitations              | 19  | Discuss limitations of the study, taking into account sources of potential bias or imprecision. Discuss both direction and magnitude of any potential bias                                                   | 11            |
| Interpretation           | 20  | Give a cautious overall interpretation of results considering objectives, limitations, multiplicity of analyses, results from similar studies, and other relevant evidence                                   | 8, 10-11      |
| Generalisability         | 21  | Discuss the generalisability (external validity) of the study results                                                                                                                                        | 10-11         |
| <b>Other information</b> |     |                                                                                                                                                                                                              |               |
| Funding                  | 22  | Give the source of funding and the role of the funders for the present study and, if applicable, for the original study on which the present article is based                                                | 12            |

\*Give information separately for cases and controls in case-control studies and, if applicable, for exposed and unexposed groups in cohort and cross-sectional studies.

**Note:** An Explanation and Elaboration article discusses each checklist item and gives methodological background and published examples of transparent reporting. The STROBE checklist is best used in conjunction with this article (freely available on the Web sites of PLoS Medicine at <http://www.plosmedicine.org/>, Annals of Internal Medicine at <http://www.annals.org/>, and Epidemiology at <http://www.epidem.com/>). Information on the STROBE Initiative is available at [www.strobe-statement.org](http://www.strobe-statement.org).



**The impact of the 2011 Great East Japan Earthquake on hospitalization for respiratory disease in rapidly aging society: a retrospective descriptive and cross-sectional study at the disaster base hospital in Ishinomaki**

|                                 |                                                                                                                                                                                                                                                                                                                                                                                                                                                                                                                                                                                                                                                                                                                 |
|---------------------------------|-----------------------------------------------------------------------------------------------------------------------------------------------------------------------------------------------------------------------------------------------------------------------------------------------------------------------------------------------------------------------------------------------------------------------------------------------------------------------------------------------------------------------------------------------------------------------------------------------------------------------------------------------------------------------------------------------------------------|
| Journal:                        | <i>BMJ Open</i>                                                                                                                                                                                                                                                                                                                                                                                                                                                                                                                                                                                                                                                                                                 |
| Manuscript ID:                  | bmjopen-2012-000865.R2                                                                                                                                                                                                                                                                                                                                                                                                                                                                                                                                                                                                                                                                                          |
| Article Type:                   | Research                                                                                                                                                                                                                                                                                                                                                                                                                                                                                                                                                                                                                                                                                                        |
| Date Submitted by the Author:   | 30-Nov-2012                                                                                                                                                                                                                                                                                                                                                                                                                                                                                                                                                                                                                                                                                                     |
| Complete List of Authors:       | Yamanda, Shinsuke; Japanese Red Cross Ishinomaki Hospital, Respiratory Medicine<br>Hanagama, Masakazu; Japanese Red Cross Ishinomaki Hospital, Department of respiratory medicine<br>Kobayashi, Seiichi; Japanese Red Cross Ishinomaki Hospital, Department of respiratory medicine<br>Satou, Hikari; Japanese Red Cross Ishinomaki Hospital, Department of respiratory medicine<br>Tokuda, Shinsaku; Kobe University Graduate School of Medicine, Division of Cell Biology<br>Niu, Kaijun; Tohoku University Graduate School of Biomedical Engineering, Division of Biomedical Engineering for Health and Welfare<br>Yanai, Masaru; Japanese Red Cross Ishinomaki Hospital, Department of respiratory medicine |
| <b>Primary Subject Heading</b>: | Respiratory medicine                                                                                                                                                                                                                                                                                                                                                                                                                                                                                                                                                                                                                                                                                            |
| Secondary Subject Heading:      | Geriatric medicine, Emergency medicine                                                                                                                                                                                                                                                                                                                                                                                                                                                                                                                                                                                                                                                                          |
| Keywords:                       | GERIATRIC MEDICINE, Adult thoracic medicine < THORACIC MEDICINE, ACCIDENT & EMERGENCY MEDICINE                                                                                                                                                                                                                                                                                                                                                                                                                                                                                                                                                                                                                  |
|                                 |                                                                                                                                                                                                                                                                                                                                                                                                                                                                                                                                                                                                                                                                                                                 |

SCHOLARONE™  
Manuscripts

1  
2  
3  
4  
5  
6  
7  
8  
9  
10  
11  
12  
13  
14  
15  
16  
17  
18  
19  
20  
21  
22  
23  
24  
25  
26  
27  
28  
29  
30  
31  
32  
33  
34  
35  
36  
37  
38  
39  
40  
41  
42  
43  
44  
45  
46  
47  
48  
49  
50  
51  
52  
53  
54  
55  
56  
57  
58  
59  
60

1 **Title**

2 The impact of the 2011 Great East Japan Earthquake on hospitalization for respiratory disease in  
3 rapidly aging society: a retrospective descriptive and cross-sectional study at the disaster base  
4 hospital in Ishinomaki

5  
6 **Author names**

7 Shinsuke Yamanda *physician scientist*<sup>1</sup>, Masakazu Hanagama *physician scientist*<sup>1</sup>, Seiichi  
8 Kobayashi *senior physician scientist*<sup>1</sup>, Hikari Satou *resident*<sup>1</sup>, Shinsaku Tokuda *lecturer*<sup>2</sup>,  
9 Kaijun Niu *associate professor*<sup>3</sup>, Masaru Yanai *director*<sup>1</sup>

10  
11 <sup>1</sup>Department of respiratory medicine, Japanese Red Cross Ishinomaki Hospital, 71 Hebita Aza  
12 Nishimichishita, Ishinomaki, Miyagi, Japan

13  
14 <sup>2</sup>Division of Cell Biology, Kobe University Graduate School of Medicine, 7-5-1 Kusunoki-cho,  
15 chuo-ku, Kobe, Hyogo, Japan

16  
17 <sup>3</sup>Division of Biomedical Engineering for Health and Welfare, Tohoku University Graduate  
18 School of Biomedical Engineering, 2-1 Seiryomachi, Aoba-ku, Sendai, Miyagi, Japan

19  
20 **Correspondence to:** Shinsuke Yamanda [syamanda@gmail.com](mailto:syamanda@gmail.com)

1  
2  
3  
4  
5  
6  
7  
8  
9  
10  
11  
12  
13  
14  
15  
16  
17  
18  
19  
20  
21  
22  
23  
24  
25  
26  
27  
28  
29  
30  
31  
32  
33  
34  
35  
36  
37  
38  
39  
40  
41  
42  
43  
44  
45  
46  
47  
48  
49  
50  
51  
52  
53  
54  
55  
56  
57  
58  
59  
60

1 **Article summary**

2 **Article focus**

3 The Great East Japan Earthquake attacked one of the most rapidly aging societies in  
4 the world. Respiratory medicine is the major field in gerontology. Here we address how  
5 seriously the disaster affected respiratory diseases in the most heavily stricken area,  
6 which has one of the highest ratios of elderly people in Japan.

7 The study gives lessons against natural disasters and aging society.

8 **Key messages**

9 After the earthquake and tsunami, admission from pneumonia and exacerbation of chronic  
10 respiratory disease in elderly increased.

11 Harsh conditions and poor ADL after the disaster may be associated with increase in  
12 hospitalization for respiratory diseases in elderly people.

13 **Strengths and limitations of study**

14 We could obtain detailed data of patient even in the catastrophic state.

15 We analyzed only hospitalized patients. But there were a great number of outpatients  
16 as well as heavy loss of lives.

1  
2  
3  
4  
5 **Abstract**

6  
7 **Objective**

8 To investigate the impact of the 2011 Great East Japan earthquake on hospitalization for  
9 respiratory disease at the disaster base hospital in aging society.

10  
11 **Design**

12 Descriptive and cross sectional study.

13  
14 **Setting**

15 Emergency care in Japanese Red Cross Ishinomaki Hospital, a regional disaster base  
16 hospital, Miyagi, Japan.

17  
18 **Participants**

19 322 emergency patients who hospitalized for respiratory disease from March 11 to May  
20 9 in 2011, and 99 and 105 emergency patients who hospitalized in the corresponding  
21 period of 2009 and 2010, respectively.

22  
23 **Main outcome measures**

24 Description and comparison of patient's characteristics and disease distribution in terms of age,  
25 time after the disaster, and activities of daily living (ADL).

26  
27 **Results**

28 Total number of patients hospitalized in our hospital in the study period was 1769 (850 in 2009,  
29 1030 in 2010), and the number of hospitalized for respiratory disease in them was 322 (99 in  
30 2009, 105 in 2010). Among admission for pulmonary diseases, pneumonia was the most  
31 frequent disease (n=190, 59.0%), followed by acute exacerbation of chronic obstructive disease  
32 (AE-COPD) (n=53, 16.5%), attack of asthma (n=27, 8.4%), and progression of lung cancer  
33 (n=22, 6.8%). Compared with the corresponding period of 2009 or 2010, increase in absolute  
34 number of hospitalization was the highest for pneumonia, followed by AE-COPD and attack of  
35 asthma. At hospitalization, 195 patients were "dependent" and 54 patients were "partially  
36 dependent". Respiratory admission accompanied by deterioration of ADL after the disaster was  
37 more frequent in elderly and female patients.

38  
39 **Conclusions**

40 After the Great East Japan Earthquake, admission for pneumonia and exacerbation of chronic  
41 respiratory disease in elderly increased at the disaster base hospital.

42  
43  
44  
45  
46  
47  
48  
49  
50  
51  
52  
53  
54  
55  
56  
57  
58  
59  
60



## 1 Introduction

2 On March 11, 2011, at 2:46 pm Japan time, the Pacific coast of Japan's Tohoku (northeastern)  
3 region was struck by the massive earthquake (The Great East Japan Earthquake), measuring  
4 magnitude 9.0 on the Richter scale<sup>1</sup>. The earthquake triggered a devastating tsunami which  
5 destroyed many towns and villages near the seashore. The epicenter was estimated to be about  
6 70 kilometers east of Oshika Peninsula of Ishinomaki in Miyagi. Officially, over 19,000 people  
7 were killed or missing and the maximum number of refugees reached more than 550,000<sup>2</sup>.

8 Ishinomaki city, located in Pacific coast of Honshu Island, suffered from the largest number of  
9 victims in Japan, 3,280 people were killed and 669 people were still missing. A great number of  
10 casualties, more than 10,000 patients in the first 30 days, were treated at Japanese Red Cross  
11 Ishinomaki Hospital, a regional disaster base hospital in Ishinomaki which uniquely preserved  
12 its hospital function in Ishinomaki region during and after the disaster.

13 Japan is one of the most rapidly aging society in the world. 23% of Japanese citizens were age  
14 65 or over in 2010<sup>3</sup>. Tohoku region is especially rapidly aging society in Japan, 26.6% of people  
15 living in Ishinomaki city were age 65 or over in 2010. Although several reports showed the  
16 significant association between age and earthquake and tsunami death<sup>4-8</sup>, there were few reports  
17 investigating the impact of a tremendous disaster on elderly peoples in such an aging society<sup>9 10</sup>.  
18 Respiratory diseases are common in the elderly even in ordinary times. So, investigating the  
19 impact of the disasters on respiratory health will contribute to elucidating the problem of aging  
20 society. Thus, we performed retrospective descriptive and cross-sectional analysis of the  
21 medical and epidemiologic data of the patient required hospitalization for respiratory disease  
22 after the Great East Japan Earthquake and following tsunami.

## 23 24 25 Methods

26 This study was a retrospective descriptive and cross-sectional analysis of the data obtained from  
27 the medical records at Japanese Red Cross Ishinomaki Hospital. We reviewed medical records  
28 of patients admitted to the hospital for respiratory diseases during the first 60 days after the  
29 Great East Japan Earthquake, when the hospital solely accepted emergency patients. We also  
30 reviewed medical records of patients who required unscheduled hospitalization for respiratory  
31 disease in the corresponding period of 2009 and 2010.

32 Japanese Red Cross Ishinomaki Hospital which had 402 beds for inpatients was located at 4.5  
33 km inland from Pacific Ocean. It has covered about 220,000 people living in its medical zone  
34 (Ishinomaki City, Onagawa Town, and Higashi-matsushima City) and assigned to a regional  
35 disaster base hospital. It has accepted almost all of the emergency respiratory patients even in  
36 the ordinary time before the disaster, because it has been the unique hospital having the

1 respiratory department and pulmonary specialists in the region.  
2 Medical records were investigated in terms of date of admission, age, sex, diagnosis. We also  
3 investigated activities of daily living (ADL) at hospitalization and ADL before earthquake, and  
4 their residence before admission on the medical record of 2011 study period. For comparison,  
5 the total number of unscheduled hospitalization during the corresponding periods in 2009 and  
6 2010 was counted.

7 Pneumonia was defined as the presence of the infiltration on chest radiograph along with one or  
8 more of the following symptoms or signs: fever, cough, sputum production, breathlessness,  
9 pleuritic chest pain or signs consistent with pneumonia on auscultation.

10 Chronic obstructive pulmonary disease (COPD) and bronchial asthma were detected by the  
11 previous spirometric data, patient's self-report, or physician's diagnosis made by patient's  
12 history, physical examination, and radiological finding. An acute exacerbation of  
13 COPD(AE-COPD) was defined as an increase in or new onset of more than one symptom of  
14 COPD (cough, sputum, wheezing, dyspnea or chest tightness) without pneumonia or  
15 pneumothorax. An attack of asthma was defined as the presentation of wheezes or severe cough  
16 in asthma patients without pneumonia. Progression of lung cancer was defined as requirement  
17 for admission for lung cancer associated condition such as dehydration, respiratory failure, or  
18 uncontrolled pain. Obstructive pneumonia due to lung cancer was considered as progression of  
19 lung cancer. Chest trauma and traumatopnea were not considered as respiratory disease but  
20 chest injury.

21 ADL was assessed by the information from a patient, patient's family, or patient's caregiver, and  
22 classified into three categories; "independent" who could live without particular support,  
23 "partially dependent" who could not leave their residence without any support, "dependent"  
24 who spent a day on the bed or the wheelchair and lost the ability to move for themselves. To  
25 investigate the impact of the disaster on ADL, we defined as "originally dependent" who were  
26 dependent or partially dependent before the disaster, and as "newly dependent" who became  
27 dependent or partially dependent after the disaster.

### 28 29 **Data analysis**

30 All data were entered into a personal computer and analyzed using Microsoft™ Excel software  
31 and statistical analysis was performed using JMP9 (SAS Institute Inc., Cary, NC, USA). A  
32 missing value in medical record was treated as "unknown". Results were given as mean ± SD  
33 for numerical variables and as proportions for categorical variables. To analyze sequential  
34 change of the effect of the disaster, we divided 60 days of study period into six groups of ten  
35 day bins. To investigate the risk of hospitalization for respiratory disease after the earthquake  
36 and tsunami, we compared the patient's characteristics of 2011 study period with the combined

1 data of 2009 and 2010 corresponding period as ordinary time. We used two-sided Student's  
2 *t*-test for numerical variables and chi-square test for the categorical variables. The  $p < 0.05$  is  
3 accepted as statistically significant.

## 4 5 6 **Result**

7 All of the scheduled hospitalization was cancelled and emergency admission was solely  
8 accepted during the first 60 day after the earthquake at Japanese Red Cross Ishinomaki Hospital.  
9 1,769 patients admitted to the hospital, and 322 of them were hospitalized for respiratory  
10 disease during the study period. In the corresponding period, total number of unscheduled  
11 hospitalization was 850 and that for respiratory disease was 99 in 2009 and 1,030 and 105 in  
12 2010. Patients hospitalized for respiratory disease accounted for 18.2% of total hospitalization  
13 during the study period. This proportion was significantly higher than that of 2009 and 2010  
14 (11.6% in 2009.  $P < 0.001$ . 10.2% in 2010.  $P < 0.001$ ). While the number of total hospitalizations  
15 of this period in 2011 was about twice of that in 2009 and 2010, hospitalization for respiratory  
16 disease in 2011 reached about three times or more than that of 2009 and 2010. The total number  
17 of hospitalizations was peaked in the first ten days, but the number of hospitalization for  
18 respiratory disease kept increasing for 20 days (Figure 1A and B).

19 We compared the number and proportion of patients hospitalized for respiratory disease  
20 between 2011, 2010, and 2009 study periods (Figure 2). Pneumonia was the most frequent  
21 disease ( $n=190$ , 59.0%), followed by AE-COPD ( $n=53$ , 16.5%), attack of asthma ( $n=27$ , 8.4%),  
22 and progression of lung cancer ( $n=22$ , 6.8%). One case of AE-COPD and seven cases of attack  
23 of asthma were physician's diagnosis. Category "Others" included pneumothorax, restrictive  
24 thoracic disease, pleural effusion, influenza, drowning, primary pulmonary hypertension,  
25 requirement of mechanical ventilator support for neuromuscular disease, and so on. One patient  
26 diagnosed as pneumonia was complicated by attack of asthma and two patients of pneumonia  
27 exacerbated their symptom of COPD. They were treated for both conditions and counted as  
28 pneumonia. In comparison with the past two years, the increase in number of hospitalizations  
29 was the largest for pneumonia, followed by AE-COPD and attack of asthma. The number of  
30 hospitalization for progression of lung cancer and that for "others" were not so different from  
31 the past two years. 39.4% of patients were hospitalized from emergency shelters.

32 To investigate the disease specific effect of earthquake, age and sex of each disease were  
33 compared between the study period in 2011 and the corresponding period in the past two years.  
34 The mean age of patients hospitalized for respiratory disease was significantly higher in 2011  
35 than in the past two years ( $75.7 \pm 12.5$  v.s.  $73.2 \pm 13.4$  years old.  $p=0.03$ ). Male proportion tended  
36 to be lower in 2011 than in the past two years (59.6% in 2011, 67.2% in 2010 and 2009.  $p=0.08$ ).

1 Specifically, pneumonia patients and AE-COPD patients were significantly older in 2011 study  
2 period than in 2010 and 2009 corresponding period(77.6±11.8 v.s. 74.3±12.8 years old in  
3 pneumonia patients. p=0.03. 76.0±8.7 v.s. 69.5±15.9 years old in AE-COPD patients. p=0.03).  
4 Male population of AE-COPD was significantly higher (81.1% v.s. 50.0%. p=0.01), whereas  
5 that of asthma attack significantly lower in 2011 period than 2010 and 2009 periods (18.5% v.s.  
6 54.6%. p=0.03).

7 Actual numbers of hospitalization for the main respiratory diseases in terms of every ten day  
8 bins during the study period is shown in Figure 3. Pneumonia peaked in the second 10 day bin.  
9 Following pneumonia, AE-COPD and attack of asthma peaked in the third 10 day  
10 bin. Progression of lung cancer had its peak in the fifth 10 day bin.

11 Next, we investigated ADL at hospitalization and ADL before the disaster among the patients  
12 hospitalized in 2011 study period. Because of confusing situation of medical activities after the  
13 disaster, ADL was not recorded in 11 patients At hospitalization, 195 patients (60.5%) were  
14 “dependent” and 54 patients (16.7%) were “partially dependent”. On the other hand, before  
15 earthquake, only 86 patients (26.7%) were “dependent” and 51 patients (15.8%) were “partially  
16 dependent”. To investigate the impact of ADL and its deterioration on admission for pulmonary  
17 disease in terms of time after the disaster, we counted the number of the patients who were  
18 “originally dependent”, “newly dependent”, or “independent throughout” during 60 days  
19 presented in 10 day bins (Figure 4). Throughout the study period, majority of patients were  
20 dependent or partially dependent patient. In the first 20 days, the majority of admissions were  
21 for originally dependent people. After 30days, there was a sharp increase in newly dependent  
22 people, as assessed by ADL. Independent patients were hospitalized mainly during first 20  
23 days.

24 Table 1 showed the association of ADL category (independent throughout, newly dependent,  
25 and originally dependent) with patient’s age, sex, and diagnosis. Regarding diagnosis, ratio of  
26 each disease was calculated in each category. Eleven patients whose ADL was not completely  
27 recorded were excluded from the data. Young and male patients were more frequent in order of  
28 independent, newly dependent and originally dependent. On investigation in patient’s diagnosis,  
29 the proportion of pneumonia and progression of lung cancer increased in the same order, while  
30 the proportion of AE-COPD and asthma decreased.

31

32

### 33 Discussion

### 34 Summary

35 In this retrospective descriptive and cross-sectional study, we found substantial increase in  
36 elderly patients hospitalized for respiratory disease after the earthquake and tsunami. Pneumonia,

37

38

39

40

41

42

1 AE-COPD, and attack of asthma were apparently increased after earthquake. Mean age of  
2 patients hospitalized for respiratory disease after the earthquake was significantly higher than  
3 that of corresponding periods of the past two years. Majority of patients had poor ADL and  
4 many of them experienced deterioration of ADL after the earthquake.

### 5 6 **Effect on respiratory disease**

7 Previous reports on Hanshin-Awaji earthquake showed initial rush of patients with injury and  
8 following increase of patients with respiratory disease, especially pneumonia<sup>11-13</sup>. Similarly, our  
9 observation showed marked increase in pneumonia patients, although initial rush of heavy  
10 injury patients was absent in this disaster because majority of victims were drowned to death  
11 and heavily injured patients were seldom carried to the hospital.

12 The cause of increase in respiratory disease was different in each situation. After the 2004  
13 Sumatra-Andaman earthquake and following tsunami, the number of lower respiratory infection  
14 in Ache was rapidly increased after the disaster and sharply declined in the second week<sup>14</sup>. On  
15 the other hand, after the 1995 Hanshin-Awaji earthquake, the number of patients hospitalized for  
16 pneumonia was gradually increased and kept high proportion over the two month<sup>9 10</sup>. This  
17 difference is ascribable to the mechanism of developing pneumonia. In Sumatra-Andaman  
18 earthquake, many of pneumonia were resulted from aspiration of tsunami-water in  
19 near-drowning events<sup>15 16</sup>. Those pneumonias were called “tsunami lung”. On the other hand, in  
20 the Hanshin-Awaji earthquake, many patients developed pneumonia in shelters under unhealthy  
21 environment and most of them were in elderly. Those pneumonias were called “shelter  
22 pneumonia”<sup>17</sup>. In this earthquake and tsunami, we experienced few number of pneumonia  
23 directly caused by aspiration of tsunami-water even in the very acute period. A few of the  
24 patient directory came from the field, instead, most patients came from shelters, their own or  
25 relative’s homes, other hospitals, or nursing homes. The mean age of them was significantly  
26 higher than that of 2010 and 2009. Therefore, we regarded most of pneumonia we treated as the  
27 same kind of “shelter pneumonia”. We could not carry out a bacteriological examination for 14  
28 days after the earthquake due to shortage of water, fuel, gas, and manpower. After that, we could  
29 perform bacteriological examination, bacterial culture or gram staining. We treated most of the  
30 pneumonias as “aspiration pneumonia in nursing home” because of the patients’ ADL.

31 AE-COPD was also remarkably increased. COPD was one of the most common chronic  
32 respiratory diseases, especially in elderly people. It is well known that interruption of treatment  
33 for chronic disease will frequently exacerbate patient’s condition, and it is also true after a  
34 natural disaster<sup>14 18-20</sup>. Many patients lost their drugs by tsunami flooding, therefore, interruption  
35 of regular medication may partly account for the increase in hospitalization by AE-COPD.  
36 Sunny and windy days lasted from the end of March and dust from the tsunami sludge was an

1 important component of particulate air pollution; it may have contributed to the significant  
2 increase in hospitalization by AE-COPD.

3 Although asthma was also one of the most common chronic respiratory diseases and had the  
4 same precipitating cause with COPD, attack of asthma was not so much increased as AE-COPD.  
5 This difference might be caused by two important differences between asthma and COPD. First,  
6 generally, patients of COPD were older than those of asthma. Therefore, baseline health  
7 condition of patients of COPD would be poorer than that of asthma<sup>21</sup>. As a result, COPD  
8 patients required more frequent hospitalization. In our study, mean age of AE-COPD was higher  
9 than that of attack of asthma as well. Second, bacterial respiratory infection affects patients with  
10 COPD more than those with asthma<sup>22</sup>. In the aftermath of earthquake, loss of hygiene and  
11 overcrowding in the shelter could increase the risk of respiratory bacterial infection and cause  
12 AE-COPD.

13 Hospitalization for lung cancer related symptoms did not increase much and its ratio to total  
14 hospitalization for respiratory diseases rather declined. Mean age of lung cancer patients was  
15 similar to that in the past two years. Maeda et al. also reported that no increase in lung cancer  
16 related hospitalization was observed after Hanshin-Awaji earthquake<sup>23</sup>. Progression of lung  
17 cancer may not be influenced by environment as much as cancer growth itself. So, the disaster  
18 will not impact on lung cancer immediately. Although the interruption of chemotherapy and/or  
19 radiotherapy would worsen the prognosis, it cannot be confirmed during our study period.

### 21 **Effect on ADL**

22 In acute phase, patients with poor ADL, especially those originally dependent, were hospitalized  
23 for pulmonary diseases, typically pneumonia, although substantial number of good ADL  
24 patients was also hospitalized. After 3 weeks, there was a sharp increase in newly dependent  
25 people who deteriorated their ADL after the disaster. It was reported that physical disability was  
26 an independent risk factor for death in Hanshin-Awaji earthquake and the 1999 Taiwan  
27 earthquake<sup>9 10</sup>. However, those reports investigated the mortality in acute phase, not  
28 hospitalization in subacute or chronic phase. After the earthquake and tsunami, one fourth of  
29 people in Ishinomaki region fled into shelters, many of which were also flooded by tsunami.  
30 They lacked water and food under harsh condition of cold season without heating in  
31 overcrowded quarter just letting them lie on the floor without beds. In such bad conditions,  
32 elderly people were restricted their consumption food and water, and kept still in a small space,  
33 resulting in deterioration of ADL. In addition, scarcity of water worsened oral hygiene. Both  
34 poor functional status and loss of oral hygiene were the major risk factor of pneumonia<sup>24-27</sup>,  
35 especially in elderly people. Subsequently, many elderly people were hospitalized for “shelter  
36 pneumonia” after the earthquake. Also, poor oral hygiene induces swallowing dysfunction<sup>28</sup> and

1 swallowing dysfunction could be a risk factor of exacerbation of COPD<sup>29</sup>. It would be one of the  
2 reasons why AE-COPD increased especially in elderly people.

#### 3 4 **Effect on aging society**

5 According to the report of government of Japan, 93% of the fatalities were drowning and more  
6 than 60% of them were over 60 years old in the Great East Japan earthquake. Although it was  
7 reported by many previous reports that elderly people had a greater risk of death after the  
8 earthquake, the proportion of the elderly killed by this earthquake and tsunami was extremely  
9 high in comparison to other major earthquake or tsunami in the world<sup>4-8</sup>. Similar finding was  
10 reported only in 1995 Hanshin-Awaji earthquake and 2004 Mid Niigata earthquake in Japan<sup>12 17</sup>.  
11 Moreover, 90.8% of the patients hospitalized for respiratory disease after the earthquake were  
12 over 60 years old in our study. These results suggest that elderly people were vulnerable not  
13 only immediately after the earthquake but also for a while after the earthquake.

14 In 1999 Taiwan earthquake, 2003 heat waves in the Czech Republic, and 2004  
15 Sumatra-Andaman earthquake, it is demonstrated that these disasters has left decreased  
16 mortality in the stricken area, resulted from a large number of direct death by disasters among a  
17 vulnerable population such as elderly people or children<sup>5 30 31</sup>, called "harvesting effect".  
18 However, our observation suggests that, in the aging society, a huge disaster not only directly  
19 kills the vulnerable people but also produces new vulnerable people. Previous reports  
20 demonstrated that prolonged harmful influence on mental health and psychological slow  
21 recovery were seen more frequently in the elderly people than young people<sup>32-35</sup>. Therefore, we  
22 should pay a long-term attention on those elderly people after a disaster.

#### 23 24 **Implications for policy and practice**

25 Our observation suggests two important targets for reducing hospitalization for respiratory  
26 disease after the major disaster in aging society. One target is interruption of treatment for  
27 chronic respiratory disease and the other target is deterioration of ADL. Interruption of  
28 treatment for chronic respiratory disease was preventable by storing the drugs for a few days.  
29 However, it is necessary to establish the system of valid storage to grasp regional prescription  
30 data of each drug and patient's personal medication data. Telemedicine system or web-based  
31 patient data storage system might be useful. Prevention of deterioration of ADL is also  
32 important. Elderly people are potentially vulnerable and easily deteriorate their ADL. In our  
33 study, remaining at shelters in stricken area for more than three weeks led increase in  
34 deterioration of ADL and hospitalization for respiratory diseases. Therefore, we propose to  
35 evacuate elderly people out of the stricken area as soon as possible.

### 1 **Strengths and weaknesses of study**

2 Our study had two important strengths. First, the Great East Japan Earthquake hit one of the  
3 most rapidly aging societies in the world<sup>3</sup>. As the proportion of elderly people continues to  
4 increase in not only developed but also developing countries, there is an urgent need of  
5 information and analysis on the aging society to plan countermeasures against it. Our study will  
6 give lessons against natural disaster to all the countries. Secondly, we obtained detailed data of  
7 patient's demographics, diagnosis, and ADL in a catastrophic situation. It is because that our  
8 hospital has kept its medical function, including electronic medical record system or laboratory  
9 systems, while devastating earthquake and tsunami hit Ishinomaki city and almost all medical  
10 facilities lost their function, and that staffs in our hospital has trained for the coming earthquake  
11 and has had an strong motivation to record our experiences as memos or on digital recorders for  
12 future disaster medicine.

13 Our study is single center study. This might be weakness of our study, but our hospital was the  
14 only functional hospital after the earthquake in Ishinomaki medical zone which account for  
15 more than 30% of total fatalities of this earthquake in Japan. Also, it has been the only hospital  
16 which has the department of respiratory medicine and pulmonary specialists in the medical zone.  
17 Even in the ordinary time before the disaster, it accepted almost all of the serious patients with  
18 pulmonary diseases who needed hospitalization. Therefore, we think our study well represents  
19 impact of the earthquake on pulmonary diseases and describes what happened in the hospital  
20 which faced the earthquake at the front<sup>2</sup>. It is also weakness of our study that we analyzed only  
21 hospitalized patients. There were a great number of outpatients and a heavy loss of lives. These  
22 events will be analyzed in the future report. Another weakness of our study is that  
23 cross-sectional study cannot elucidate a causal relationship. Finally, we did not clearly define  
24 the condition of hospitalization. Because the destruction of ordinary healthcare system and poor  
25 hygiene outside the hospital, we hospitalized some patients who could be treated in outpatient  
26 setting in ordinary time. However, this was a real situation after devastating disaster.

### 27 **Conclusion**

28 The Great East Japan earthquake and following tsunami hit the one of the most rapidly aging  
29 society in the world. After the disaster, pneumonia, exacerbation of COPD, bronchial asthma  
30 attack associated with bad ADL in the elderly provoked the most part of increase in  
31 hospitalization for pulmonary diseases. These observations should be exploited in constructing  
32 emergency medical management for disasters in progressive rapidly aging society.

### 33 **Acknowledgement**

34 We would like to express our gratitude to all of the relief teams and volunteers from all area of  
35  
36



1 Japan and foreign countries for their kind and warm supports. We also thank doctors, nurses,  
2 and other employees in Japanese Red Cross Ishinomaki Hospital.

3 **Competing interests:** None declared.

4 **Ethical approval:** Approval of ethical review committee of Japanese Red Cross Ishinomaki  
5 Hospital was obtained.

6 **Contributors:** SY was responsible for study design and interpretation of the data, and drafted  
7 the manuscript. MH, SK, HS, ST, and MY were responsible for collection and interpretation of  
8 the data. KN drafted the statistical analysis part in the manuscript, and provided suggestions on  
9 public health and epidemiology. MH, SK and MY were responsible for study design and revised  
10 the drafted manuscript. SY, MH, SK, HS, ST and MY treated the patients. All authors approved  
11 the final version of the manuscript.

12 **Data sharing statement:** There is no additional data available.

13 **Funding:** This study was not funded by any research funds.

## 14 15 **References**

- 16 1. McCurry J. Japan: the aftermath. *Lancet* 2011;**377**:1061-1062.
- 17 2. National Police Agency. *Dmage Situation and Police Countermeasure*.  
18 [www.npa.go.jp/archive/keibi/biki/index\\_e.htm](http://www.npa.go.jp/archive/keibi/biki/index_e.htm) (accessed 29 Dec 2011).
- 19 3. Tamiya N, Noguchi H, Nishi A, *et al*. Population ageing and wellbeing: lessons from Japan's  
20 long-term care insurance policy. *Lancet* 2011;**378**:1183-1192.
- 21 4. Liang NJ, Shih YT, Shih FY, *et al*. Disaster epidemiology and medical response in the  
22 Chi-Chi earthquake in Taiwan. *Ann Emerg Med* 2001;**38**:549-555.
- 23 5. Chan CC, Lin YP, Chen HH, *et al*. A population-based study on the immediate and prolonged  
24 effects of the 1999 Taiwan earthquake on mortality. *Ann Epidemiol* 2003;**13**:502-508.
- 25 6. Nishikiori N, Abe T, Costa DG, *et al*. Who died as a result of the tsunami? Risk factors of  
26 mortality among internally displaced persons in Sri Lanka: a retrospective cohort analysis. *BMC*  
27 *Public Health* 2006;**6**:73.
- 28 7. Rofi A, Doocy S, Robinson C. Tsunami mortality and displacement in Aceh province,  
29 Indonesia. *Disasters* 2006;**30**:340-350.
- 30 8. Doocy S, Rofi A, Moodie C, *et al*. Tsunami mortality in Aceh Province, Indonesia. *Bull*  
31 *World Health Organ* 2007;**85**:273-278.
- 32 9. Chou YJ, Huang N, Lee CH, *et al*. Who is at risk of death in an earthquake? *Am J Epidemiol*  
33 2004;**160**:688-695.
- 34 10. Osaki Y, Minowa M. Factors associated with earthquake deaths in the great Hanshin-Awaji  
35 earthquake, 1995. *Am J Epidemiol* 2001;**153**:153-156.
- 36 11. Takakura R, Himeno S, Kanayama Y, *et al*. Follow-up after the Hanshin-Awaji earthquake:

- 1  
2  
3  
4  
5  
6  
7  
8  
9  
10  
11  
12  
13  
14  
15  
16  
17  
18  
19  
20  
21  
22  
23  
24  
25  
26  
27  
28  
29  
30  
31  
32  
33  
34  
35  
36  
37  
38  
39  
40  
41  
42  
43  
44  
45  
46  
47  
48  
49  
50  
51  
52  
53  
54  
55  
56  
57  
58  
59  
60
- 1 diverse influences on pneumonia, bronchial asthma, peptic ulcer and diabetes mellitus. *Intern Med* 1997;**36**:87-91.
  - 2
  - 3 12. Tanaka H, Oda J, Iwai A, *et al*. Morbidity and mortality of hospitalized patients after the
  - 4 1995 Hanshin-Awaji earthquake. *Am J Emerg Med* 1999;**17**:186-191.
  - 5 13. Matsuoka T, Yoshioka T, Oda J, *et al*. The impact of a catastrophic earthquake on morbidity
  - 6 rates for various illnesses. *Public Health* 2000;**114**:249-253.
  - 7 14. Guha-Sapir D, van Panhuis WG. Health impact of the 2004 Andaman Nicobar earthquake
  - 8 and tsunami in Indonesia. *Prehosp Disaster Med* 2009;**24**:493-499.
  - 9 15. Chierakul W, Winothai W, Wattanawaitunechai C, *et al*. Melioidosis in 6 tsunami survivors
  - 10 in southern Thailand. *Clin Infect Dis* 2005;**41**:982-990.
  - 11 16. Potera C. In disaster's wake: tsunami lung. *Environ Health Perspect* 2005;**113**:A734.
  - 12 17. Tanida N. What happened to elderly people in the great Hanshin earthquake. *BMJ*
  - 13 1996;**313**:1133-1135.
  - 14 18. Guha-Sapir D, van Panhuis WG, Lagoutte J. Short communication: patterns of chronic and
  - 15 acute diseases after natural disasters - a study from the International Committee of the Red
  - 16 Cross field hospital in Banda Aceh after the 2004 Indian Ocean tsunami. *Trop Med Int Health*
  - 17 2007;**12**:1338-1341.
  - 18 19. Miller AC, Arquilla B. Chronic diseases and natural hazards: impact of disasters on diabetic,
  - 19 renal, and cardiac patients. *Prehosp Disaster Med* 2008;**23**:185-194.
  - 20 20. Tomita K, Hasegawa Y, Watanabe M, *et al*. The Totton-Ken Seibu earthquake and
  - 21 exacerbation of asthma in adults. *J Med Invest* 2005;**52**:80-84.
  - 22 21. Soriano JB, Davis KJ, Coleman B, *et al*. The proportional Venn diagram of obstructive lung
  - 23 disease: two approximations from the United States and the United Kingdom. *Chest*
  - 24 2003;**124**:474-481.
  - 25 22. Pauwels RA. Similarities and differences in asthma and chronic obstructive pulmonary
  - 26 disease exacerbations. *Proc Am Thorac Soc* 2004;**1**:73-76.
  - 27 23. Maeda H, Nakagawa M, Yokoyama M. Hospital admissions for respiratory diseases in the
  - 28 aftermath of the great Hanshin earthquake[Article in Japanese]. *Nihon Kyobu Shikkan Gakkai*
  - 29 *Zasshi* 1996;**34**:164-173.
  - 30 24. El-Solh AA, Pietrantonio C, Bhat A, *et al*. Microbiology of severe aspiration pneumonia in
  - 31 institutionalized elderly. *Am J Respir Crit Care Med* 2003;**167**:1650-1654.
  - 32 25. Loeb MB, Becker M, Eady A, Walker-Dilks C. Interventions to prevent aspiration
  - 33 pneumonia in older adults: a systematic review. *J Am Geriatr Soc* 2003;**51**:1018-1022.
  - 34 26. Langmore SE, Skarupski KA, Park PS, *et al*. Predictors of aspiration pneumonia in nursing
  - 35 home residents. *Dysphagia* 2002;**17**:298-307.
  - 36 27. Terpenning MS, Taylor GW, Lopatin DE, *et al*. Aspiration pneumonia: dental and oral risk

- 1 factors in an older veteran population. *J Am Geriatr Soc* 2001;**49**:557-563.
- 2 28. Yoshino A, Ebihara T, Ebihara S, *et al*. Daily oral care and risk factors for pneumonia  
3 among elderly nursing home patients. *JAMA* 2001;**286**:2235-2236.
- 4 29. Kobayashi S, Kubo H, Yanai M. Impairment of swallowing in COPD. *Am J Respir Crit*  
5 *Care Med* 2009;**180**:481.
- 6 30. Nishikiori N, Abe T, Costa DG, *et al*. Timing of mortality among internally displaced  
7 persons due to the tsunami in Sri Lanka: cross sectional household survey. *BMJ*  
8 2006;**332**:334-335.
- 9 31. Kysely J, Kriz B. Decreased impacts of the 2003 heat waves on mortality in the Czech  
10 Republic: an improved response? *Int J Biometeorol* 2008;**52**:733-745.
- 11 32. Toyabe S, Shioiri T, Kuwabara H, *et al*. Impaired psychological recovery in the elderly after  
12 the Niigata-Chuetsu Earthquake in Japan: a population-based study. *BMC Public Health*  
13 2006;**6**:230.
- 14 33. Seplaki CL, Goldman N, Weinstein M, *et al*. Before and after the 1999 Chi-Chi earthquake:  
15 traumatic events and depressive symptoms in an older population. *Soc Sci Med*  
16 2006;**62**:3121-3132.
- 17 34. Ueki A, Morita Y, Miyoshi K. Changes in symptoms after the great Hanshin Earthquake in  
18 patients with dementia[Article in Japanese]. *Nihon Ronen Igakkai Zasshi* 1996;**33**:573-579.
- 19 35. Maeda K, Kakigi T. Manifestation of the symptoms in demented patients after the Great  
20 Hanshin Earthquake in Japan[Article in Japanese]. *Seishin Shinkeigaku Zasshi*  
21 1996;**98**:320-328.
- 22  
23  
24  
25  
26  
27  
28  
29  
30  
31  
32  
33  
34  
35  
36  
37  
38  
39  
40  
41  
42  
43  
44  
45  
46  
47  
48  
49  
50  
51  
52  
53  
54  
55  
56  
57  
58  
59  
60

1 **Table**

2 Table 1. Association of ADL with patient's characteristics and respiratory disease.

3

|             | Independent<br>n=70 | Newly<br>dependent<br>n=104 | Originally<br>dependent<br>n=137 |
|-------------|---------------------|-----------------------------|----------------------------------|
| Age         | 69.9±15.1           | 73.1±11.2                   | 80.3±10.5                        |
| Male        | 49 (70.0)           | 63 (60.6)                   | 69 (50.4)                        |
| Diagnosis   |                     |                             |                                  |
| Pneumonia   | 31 (44.3)           | 59 (56.7)                   | 94 (68.6)                        |
| AE-COPD     | 17 (24.3)           | 17 (16.4)                   | 15 (11.0)                        |
| Asthma      | 11 (15.7)           | 11 (10.6)                   | 5 (3.7)                          |
| Lung cancer | 3 (4.3)             | 6 (5.8)                     | 12 (8.8)                         |
| Others      | 8 (11.4)            | 11 (8.0)                    | 11 (8.0)                         |

4 AE-COPD, acute exacerbation of COPD.

5 Data are mean ±SD for numerical variables and number (%) for categorical variables.

6

7

8

9

10

11

12

13

14

15

16

17

18

19

20

21

22

23

24

25

1  
2  
3  
4  
5  
6  
7  
8  
9  
10  
11  
12  
13  
14  
15  
16  
17  
18  
19  
20  
21  
22  
23  
24  
25  
26  
27  
28  
29  
30  
31  
32  
33  
34  
35  
36  
37  
38  
39  
40  
41  
42  
43  
44  
45  
46  
47  
48  
49  
50  
51  
52  
53  
54  
55  
56  
57  
58  
59  
60

1 **Figure legends**

2 Figure 1. The number of unscheduled new hospitalizations for all causes (A) and for respiratory  
3 disease (B) from March 11 to May 9 in 2009, 2010 and 2011, presented in 10 day bins.

4  
5 Figure 2. The number and proportion of patients hospitalized for respiratory disease pooled  
6 from March 11 to May 9 in 2009, 2010, and 2011.

7  
8 Figure 3. Distribution of patients hospitalized for respiratory disease after the Great East Japan  
9 earthquake from March 11 to May 9 in 2011, presented in 10 day bins.

10  
11 Figure 4. Influence of the disaster on ADL status and its deterioration in hospitalized patients for  
12 respiratory disease from March 11 to May 9 in 2011, presented in 10 day bins.

1  
2  
3  
4  
5  
6  
7  
8  
9  
10  
11  
12  
13  
14  
15  
16  
17  
18  
19  
20  
21  
22  
23  
24  
25  
26  
27  
28  
29  
30  
31  
32  
33  
34  
35  
36  
37  
38  
39  
40  
41  
42  
43  
44  
45  
46  
47  
48  
49  
50  
51  
52  
53  
54  
55  
56  
57  
58  
59  
60

1 | **Title**

2 | The impact of the 2011 Great East Japan Earthquake on hospitalization for respiratory disease in  
3 | ~~advanced~~rapidly aging society: a retrospective descriptive and cross-sectional study at the  
4 | disaster base hospital in Ishinomaki

6 | **Author names**

7 | Shinsuke Yamanda *physician scientist*<sup>1</sup>, Masakazu Hanagama *physician scientist*<sup>1</sup>, Seiichi  
8 | Kobayashi *senior physician scientist*<sup>1</sup>, Hikari Satou *resident*<sup>1</sup>, Shinsaku Tokuda *lecturer*<sup>2</sup>,  
9 | Kaijun Niu *associate professor*<sup>3</sup>, Masaru Yanai *director*<sup>1</sup>

11 | <sup>1</sup>Department of respiratory medicine, Japanese Red Cross Ishinomaki Hospital, 71 Hebita Aza  
12 | Nishimichishita, Ishinomaki, Miyagi, Japan

14 | <sup>2</sup>Division of Cell Biology, Kobe University Graduate School of Medicine, 7-5-1 Kusunoki-cho,  
15 | chuo-ku, Kobe, Hyogo, Japan

17 | <sup>3</sup>Division of Biomedical Engineering for Health and Welfare, Tohoku University Graduate  
18 | School of Biomedical Engineering, 2-1 Seiryomachi, Aoba-ku, Sendai, Miyagi, Japan

20 | **Correspondence to:** Shinsuke Yamanda [syamanda@gmail.com](mailto:syamanda@gmail.com)

Formatted

1  
2  
3  
4  
5  
6  
7  
8  
9  
10  
11  
12  
13  
14  
15  
16  
17  
18  
19  
20  
21  
22  
23  
24  
25  
26  
27  
28  
29  
30  
31  
32  
33  
34  
35  
36  
37  
38  
39  
40  
41  
42  
43  
44  
45  
46  
47  
48  
49  
50  
51  
52  
53  
54  
55  
56  
57  
58  
59  
60

1 **Article summary**

2 **Article focus**

3 | The Great East Japan Earthquake attacked one of the most ~~advanced~~rapidly aging  
4 societies in the world. Respiratory medicine is the major field in gerontology. Here we  
5 address how seriously the disaster affected respiratory diseases in the most heavily  
6 stricken area, which has one of the highest ratios of elderly people in Japan.

7 The study gives lessons against natural disasters and aging society.

8 **Key messages**

9 After the earthquake and tsunami, admission from pneumonia and exacerbation of chronic  
10 respiratory disease in elderly increased.

11 Harsh conditions and poor ADL after the disaster may be associated with increase in  
12 hospitalization for respiratory diseases in elderly people.

13 **Strengths and limitations of study**

14 | We could obtain detailed data of patient even in ~~the~~ catastrophic state.

15 We analyzed only hospitalized patients. But there were a great number of outpatients  
16 as well as heavy loss of lives.

## Abstract

### Objective

To investigate the impact of the 2011 Great East Japan earthquake on hospitalization for respiratory disease at the disaster base hospital in aging society.

### Design

Descriptive and cross sectional study.

### Setting

Emergency care in Japanese Red Cross Ishinomaki Hospital, a regional disaster base hospital, Miyagi, Japan.

### Participants

322 emergency patients who hospitalized for respiratory disease from March 11 to May 9 in 2011, and ~~99 and 105~~204 emergency patients who hospitalized in the corresponding ~~time~~-period of 2009 and 2010, respectively.

### Main outcome measures

Description and comparison of patient's characteristics and disease distribution in terms of age, time after the disaster, and activity of daily living (ADL).

### Results

Total ~~number of patients hospitalized in our hospital in the study period was 1769 (1,769~~850 in 2009, 1030 in 2010), and the ~~patients admitted to our hospital, and number of hospitalized for respiratory disease in them was 322 (99 in 2009, 105 in 2010). 322 of them were hospitalized for respiratory disease during the first 60 days after the earthquake. Mean age of patient was 75.7±12.5 years old. Among admission for pulmonary diseases, p~~pneumonia was the most frequent disease (n=190, 59.0%), followed by acute exacerbation of chronic obstructive disease (AE-COPD) (n=53, 16.5%), attack of asthma (n=27, 8.4%), and progression of lung cancer (n=22, 6.8%). Compared with the corresponding period of 2009 or 2010, increase in absolute number of hospitalization was the highest for pneumonia, followed by AE-COPD and attack of asthma. ~~Elderly patients were more likely hospitalized after the earthquake, especially for pneumonia and AE-COPD.~~At hospitalization, 195 patients were "dependent" and 54 patients were "partially dependent". Respiratory admission accompanied by deterioration ~~Deterioration~~-of ADL after the disaster was more frequent in elderly and female patients.

~~The mean age was 73.1±11.2 years old in the patients with deterioration of ADL and 69.9±15.1 in the patients without deterioration of ADL. The male proportion was 60.6% in the patients with deterioration of ADL and 70% in the patients without deterioration of ADL.~~

### Conclusions

After the Great East Japan Earthquake, admission for pneumonia and exacerbation of chronic respiratory disease in elderly increased at the disaster base hospital.



## Introduction

On March 11, 2011, at 2:46 pm Japan time, the Pacific coast of Japan's Tohoku (northeastern) region was struck by the massive earthquake (The Great East Japan Earthquake), measuring magnitude 9.0 on the Richter scale<sup>1</sup>. The earthquake triggered a devastating tsunami which destroyed many towns and villages near the seashore. The epicenter was estimated to be about 70 kilometers east of Oshika Peninsula of Ishinomaki in Miyagi. Officially, over 19,000 people were killed or missing and the maximum number of refugees reached more than 550,000<sup>2</sup>.

Ishinomaki city, located in Pacific coast of Honshu Island, suffered from the largest number of victims in Japan, 3,280 people were killed and 669 people were still missing. A great number of casualties, more than 10,000 patients in the first 30 days, were treated at Japanese Red Cross Ishinomaki Hospital, a regional disaster base hospital in Ishinomaki which uniquely preserved its hospital function in Ishinomaki region ~~during and after the disaster~~.

Japan is one of the most ~~rapidly advanced~~ aging society in the world. 23% of Japanese citizens were ~~age 65 or over years old or more~~ in 2010<sup>3</sup>. ~~Especially~~, Tohoku region is ~~especially rapidly a highly advanced~~ aging society in Japan, 26.6% of people living in Ishinomaki city were ~~age 65 or over years old or more~~ in 2010<sup>4</sup>. Although several reports showed the significant association between age and earthquake and tsunami death<sup>4-8</sup>, there were few reports investigating the impact of a tremendous disaster on ~~elderly peoples in~~ such an aging society<sup>9</sup><sup>10</sup>.

Respiratory diseases are common in ~~the elderly people~~ even in ordinary times. So, investigating the impact of the disasters on respiratory health will contribute to elucidating the problem of aging society. Thus, we performed retrospective descriptive and cross-sectional analysis of the medical and epidemiologic data of the patient ~~requiring~~ required hospitalization for respiratory disease after the Great East Japan Earthquake and following tsunami.

## Methods

This study was a retrospective descriptive and cross-sectional analysis of the data obtained from

1  
2  
3  
4  
5  
6  
7  
8  
9  
10  
11  
12  
13  
14  
15  
16  
17  
18  
19  
20  
21  
22  
23  
24  
25  
26  
27  
28  
29  
30  
31  
32  
33  
34  
35  
36  
37  
38  
39  
40  
41  
42  
43  
44  
45  
46  
47  
48  
49  
50  
51  
52  
53  
54  
55  
56  
57  
58  
59  
60

1 the medical records at Japanese Red Cross Ishinomaki Hospital. We reviewed medical records  
2 of patients admitted to the hospital for respiratory diseases during the first 60 days after the  
3 Great East Japan Earthquake, when the hospital solely accepted emergency patients. We also  
4 reviewed medical records of patients who required unscheduled hospitalization for respiratory  
5 disease in the corresponding period of 2009 and 2010.  
6 Japanese Red Cross Ishinomaki Hospital which had 402 beds for inpatients was located at 4.5  
7 km inland from Pacific Ocean. It has covered about 220,000 people living in its medical zone  
8 (Ishinomaki City, Onagawa Town, ~~or~~ and Higashi-matsushima City) and assigned to a regional  
9 disaster base hospital. It has ~~received~~accepted almost all of the emergency respiratory patients  
10 even in the ordinary time before the disaster, because it ~~is~~has been the unique hospital having  
11 the respiratory department and pulmonary specialists in the region.  
12 Medical records were investigated in terms of date of admission, age, sex, diagnosis. We also  
13 investigated ~~activities~~activity of daily living (ADL) at hospitalization and ADL before  
14 earthquake, and their residence before admission on the medical record of 2011 study period.  
15 For comparison, the total number of unscheduled hospitalization ~~to the hospital~~ during the  
16 corresponding periods in 2009 and 2010 was counted.  
17 Pneumonia was defined as the presence of the infiltration on chest radiograph along with one or  
18 more of the following symptoms or signs: fever, cough, sputum production, breathlessness,  
19 pleuritic chest pain or signs consistent with pneumonia on auscultation.  
20 Chronic obstructive pulmonary disease (COPD) and bronchial asthma were detected by the  
21 previous spirometric data, patient's self-report, or physician's diagnosis made by patient's  
22 history, physical examination, and radiological finding. An acute exacerbation of  
23 COPD(AE-COPD) was defined as an increase in or new onset of more than one symptom of  
24 COPD (cough, sputum, wheezing, dyspnea or chest tightness) without pneumonia or  
25 pneumothorax. An attack of asthma was defined as the presentation of wheezes or severe cough  
26 in asthma patients without pneumonia. Progression of lung cancer was defined as requirement  
27 for admission for lung cancer associated condition such as dehydration, respiratory failure, or  
28 uncontrolled pain. Obstructive pneumonia due to lung cancer was considered as progression of  
29 lung cancer. Chest trauma and traumatopnea were not considered as respiratory disease but  
30 chest injury.  
31 ADL was assessed by the information from a patient, patient's family, or patient's caregiver, and  
32 classified into three categories; "independent" who could live without particular support,  
33 "partially dependent" who could not leave their residence without any support, "dependent"  
34 who spent a day on the bed or the wheelchair and lost the ability to move for themselves.  
35 ~~Furthermore~~To investigate the impact of the disaster on ADL, we defined as "originally  
36 dependent" who were dependent or partially dependent before the disaster, and as "newly

1 dependent” who became dependent or partially dependent after the disaster.

#### 2 3 4 **Data analysis**

5 All data were entered into a personal computer and analyzed using Microsoft™ Excel software  
6 and statistical analysis was performed using JMP9 (SAS Institute Inc., Cary, NC, USA). A  
7 missing value in medical record was treated as “unknown”. Results were given as mean ± SD  
8 for numerical variables and as proportions for categorical variables. To analyze sequential  
9 change of the effect of the disaster, we divided 60 days of study period into six groups of ~~each~~  
10 ten days bins. To investigate the risk of hospitalization for respiratory disease after the  
11 earthquake and tsunami, we compared the patient’s characteristics of 2011 study period with the  
12 ~~that of combined data of 2010 and 2009~~ 2009 and 2010 corresponding period as ordinary time.  
13 We used two-sided Student’s *t*-test for numerical variables and chi-square test for the categorical  
14 variables. ~~We calculated the effect of age and sex on the odds ratio for hospitalization for~~  
15 ~~respiratory disease after the earthquake by logistic regression models.~~The  $p < 0.05$  is accepted  
16 as statistically significant.

#### 17 18 19 **Result**

20 All of the scheduled hospitalization was cancelled and emergency admission was solely  
21 accepted during the first 60 day after the earthquake at Japanese Red Cross Ishinomaki Hospital.  
22 1,769 patients admitted to the hospital, and 322 of them were hospitalized for respiratory  
23 disease during the study period. ~~Patients hospitalized for respiratory disease accounted for~~  
24 ~~18.2% of total hospitalization during the study period.~~ In the corresponding period, total number  
25 of unscheduled hospitalization was 850 and that for respiratory disease was 99 in 2009 and  
26 1,030 and 105 in 2010. Patients hospitalized for respiratory disease accounted for 18.2% of total  
27 hospitalization during the study period. This proportion was significantly higher than that of  
28 2009 and 2010 (11.6% in 2009,  $P < 0.001$ , 10.2% in 2010,  $P < 0.001$ ). ~~the corresponding period of~~  
29 ~~past two years, 10.2% of 2010 and 11.6% of 2009.~~ While the number of total hospitalizations  
30 of this period in 2011 was about twice of that in 2009 and 2010, hospitalization for respiratory  
31 disease in 2011 reached about three times or more than that of 2009 and 2010. The total number  
32 of hospitalizations was at peak peaked in the first ten days ~~and then decreased~~, but the number of  
33 hospitalization for respiratory disease kept increasing for 20 days (Figure 1A and B).

34  
35 We compared the number and proportion of patients hospitalized for respiratory diseasedisease  
36 distribution between 2011, 2010, and 2009 study periods (Figure 2). Pneumonia was the most

Formatted: Font: Bold

1  
2  
3  
4  
5  
6  
7  
8 frequent disease (n=190, 59.0%), followed by AE-COPD (n=53, 16.5%), attack of asthma (n=27,  
9 8.4%), and progression of lung cancer (n=22, 6.8%). One case of AE-COPD and seven cases of  
10 attack of asthma were physician's diagnosis. ~~Category "Others" included pneumothorax,~~  
11 ~~restrictive thoracic disease, pleural effusion, influenza, drowning, primary pulmonary~~  
12 ~~hypertension, requirement of mechanical ventilator support for neuromuscular disease, and so~~  
13 ~~on. One patient diagnosed as pneumonia was complicated by attack of asthma and two patients~~  
14 ~~of pneumonia exacerbated their symptom of COPD. They were treated for both conditions and~~  
15 ~~counted as pneumonia. In comparison with the past two years, the increase in absolute number~~  
16 ~~of hospitalizations was the largest for pneumonia, followed by AE-COPD and attack of asthma.~~  
17 ~~The number of hospitalization for progression of lung cancer and that for "others" diseases were~~  
18 ~~not so different from the past two years. 39.4% of patients were hospitalized from stayed~~  
19 ~~at emergency shelters before hospitalization.~~

20  
21  
22  
23  
24  
25 To investigate the disease specific effect of earthquake, age and sex of each disease were  
26 compared between the study period in 2011 and the corresponding period in the past two years  
27 (Table 1). The mean age of patients hospitalized for respiratory disease was significantly higher  
28 in 2011 than in the past two years (75.7±12.5 years old v.s. in 2011, 73.2±13.4 years old in 2010  
29 and 2009. p=0.03). Male proportion tended to be lower in 2011 than in the past two years  
30 (59.6% in 2011, 67.2% in 2010 and 2009. p=0.08). Specifically, pneumonia patients and  
31 AE-COPD patients were significantly older in 2011 study period than in 2010 and 2009  
32 corresponding period (77.6±11.8 v.s. 74.3±12.8 years old in pneumonia patients. p=0.03,  
33 76.0±8.7 v.s. 69.5±15.9 years old in AE-COPD patients. -and p=0.03, respectively). Male  
34 population of AE-COPD was significantly higher (81.1% v.s. 50.0%. p=0.01), whereas that of  
35 attack of asthma attack significantly lower in 2011 period than 2010 and 2009 periods (18.5%  
36 v.s. 54.6%. p=0.01 and p=0.03, respectively).

37  
38  
39  
40  
41  
42  
43  
44  
45  
46  
47  
48  
49  
50  
51  
52  
53  
54  
55  
56  
57  
58  
59  
60  
~~Furthermore, the effect of age and sex on the odds ratio for hospitalization with respiratory~~  
~~disease was calculated (Table 2). We found older patients were more likely hospitalized after the~~  
~~earthquake, especially for pneumonia and AE-COPD. Male patients were more likely~~  
~~hospitalized for AE-COPD and less likely hospitalized for attack of asthma.~~

31 Actual numbers of hospitalization for the main respiratory diseases in terms of every ten days  
32 bins during the study period is shown in Figure 3. Pneumonia presented its peak peaked in the  
33 second period 10 day bin. Following pneumonia, AE-COPD and attack of asthma presented its  
34 peak peaked in the third 10 day bin period. -and pP progression of lung cancer had its peak in the  
35 fifth 10 day bin period. Attack of asthma had small peak in the same third period as AECOPD.

1  
2  
3  
4  
5  
6  
7  
8  
9  
10  
11  
12  
13  
14  
15  
16  
17  
18  
19  
20  
21  
22  
23  
24  
25  
26  
27  
28  
29  
30  
31  
32  
33  
34  
35  
36  
37  
38  
39  
40  
41  
42  
43  
44  
45  
46  
47  
48  
49  
50  
51  
52  
53  
54  
55  
56  
57  
58  
59  
60

1 Next, we investigated ADL at hospitalization and ADL before the disaster among the patients  
2 hospitalized in 2011 study period. Because of confusing situation of medical activities after the  
3 disaster, ~~ADL was not recorded in 11 patients-ADL before the disaster, ADL at hospitalization,~~  
4 ~~and both ADL were not recorded in 8, 1, and 2 patients, respectively. Six of them were~~  
5 ~~hospitalized for pneumonia and remaining five patients were hospitalized for AE-COPD. At~~  
6 hospitalization, 195 patients (60.5%) were “dependent” and 54 patients (16.7%) were “partially  
7 dependent”. ~~Those patients accounted for 76.9 % of the patients hospitalized after the~~  
8 ~~earthquake.~~ On the other hand, before earthquake, only 86 patients (26.7%) were “dependent”  
9 and 51 patients (15.8%) were “partially dependent”. ~~Those patients accounted for 42.5% of~~  
10 ~~hospitalized patients after the earthquake. To investigate the impact of ADL and its deterioration~~  
11 ~~on admission for pulmonary disease in terms of time after the disaster, we we analyze sequential~~  
12 ~~change incounted~~ the number of the patients who were “originally dependent”, “newly  
13 dependent”, or “independent throughout” at hospitalization during 60 days presented in 10 day  
14 bins (Figure 4). Throughout the study period, majority of patients were dependent or partially  
15 dependent patient. ~~In the first 20 days, the majority of admissions were for originally dependent~~  
16 ~~people. After 30days, there was a sharp increase in newly dependent people, as assessed by~~  
17 ~~ADL.Originally dependent patients were hospitalized especially in early period (first and second~~  
18 ~~periods), and newly dependent patients showed its keen peak of hospitalization in the third~~  
19 ~~period, the day from 21 to 30 after the earthquake, and kept high incidence of admission~~  
20 ~~thereafter.~~ Independent patients were hospitalized mainly during first 20 days.

21  
22  
23  
24  
25  
26  
27  
28  
29  
30  
31  
32  
33  
34  
35  
36  
37  
38  
39  
40  
41  
42  
43  
44  
45  
46  
47  
48  
49  
50  
51  
52  
53  
54  
55  
56  
57  
58  
59  
60

Table 13 showed the association of ADL category (independent throughout, newly dependent, and originally dependent) with patient’s age, sex, and diagnosis. Regarding diagnosis, ratio of each disease was calculated in each category. Eleven patients whose ADL was not completely recorded were excluded from the data. Young and male patients were more frequent in order of independent, newly dependent and originally dependent. On investigation in patient’s diagnosis, the proportion of pneumonia and progression of lung cancer increased in the same order, while the proportion of AE-COPD and asthma decreased.

## Discussion

### Summary

In this retrospective descriptive and cross-sectional study, we found substantial increase in elderly patients hospitalized for respiratory disease after the earthquake and tsunami. Pneumonia, AE-COPD, and attack of asthma were apparently increased after earthquake. Mean age of

1 patients hospitalized for respiratory disease after the earthquake was significantly higher than  
2 that of ~~ordinary years~~ corresponding periods of the past two years. Majority of patients had poor  
3 ADL and many of them experienced deterioration of ADL after the earthquake.  
4

#### 5 6 **Effect on respiratory disease**

7 Previous reports on Hanshin-Awaji earthquake showed initial rush of patients with injury and  
8 following increase of patients with respiratory disease, especially pneumonia<sup>11-13</sup>. Similarly, our  
9 observation showed marked increase in pneumonia patients, although initial rush of heavy  
10 injury patients was absent in this disaster because majority of victims were ~~drown~~ drowned  
11 death and heavily injured patients were seldom carried to the hospital.

12 The cause of increase in respiratory disease was different in each situation. After the 2004  
13 Sumatra-Andaman earthquake and following tsunami, the number of lower respiratory infection  
14 in Aceh was rapidly increased after the disaster and sharply declined in the second week<sup>14</sup>. On  
15 the other hand, after the 1995 Hanshin-Awaji earthquake, the number of patients hospitalized for  
16 pneumonia was gradually increased and kept high proportion over the two month<sup>9 10</sup>. This  
17 difference is ascribable to the mechanism of developing pneumonia. In Sumatra-Andaman  
18 earthquake, many of pneumonia were resulted from aspiration of tsunami-water in  
19 near-drowning events<sup>15 16</sup>. Those pneumonias were called “tsunami lung”. On the other hand, in  
20 the Hanshin-Awaji earthquake, many patients developed pneumonia in shelters under unhealthy  
21 environment and most of them were in elderly. Those pneumonias were called “shelter  
22 pneumonia”<sup>17</sup>. In this earthquake and tsunami, we experienced few number of pneumonia  
23 directly caused by aspiration of tsunami-water even in the very acute period. ~~Most patients came~~  
24 ~~from their own or relative’s home, other hospital, nursing home, or shelter, and a~~ few of the  
25 patient directory came from the field, instead, most patients came from shelters, their own or  
26 relative’s homes, other hospitals, or nursing homes. The mean age of them was significantly  
27 higher than that of 2010 and 2009. Therefore, we ~~thought~~ regarded most of pneumonia we  
28 treated ~~was~~ the same kind of “shelter pneumonia”. We could not carry out a bacteriological  
29 examination for 14 days after the earthquake due to shortage of water, fuel, gas, and manpower.  
30 After that, we could perform bacteriological examination, bacterial culture or gram staining. We  
31 treated most of the pneumonias as “aspiration pneumonia in nursing home” because of the  
32 patients’ ADL.

33 AE-COPD was also remarkably increased. COPD was one of the most common chronic  
34 respiratory diseases, especially in elderly people. It is well known that interruption of treatment  
35 for chronic disease will easily frequently exacerbate patient’s condition, and it is also true after a  
36 natural disaster<sup>14 18-20</sup>. Many patients lost their drugs by tsunami flooding, therefore, interruption

1 of regular medication may partly account for the increase in hospitalization by AE-COPD.

2 ~~Sunny and windy days lasted from the end of March and dust from the tsunami sludge was an~~  
3 ~~important component of particulate air pollution; it may have contributed to the significant~~  
4 ~~increase in~~ We also speculate that air pollution caused by tsunami dust may raise the  
5 hospitalization by AE-COPD. ~~After cold and snowy weather for ten days from the disaster,~~  
6 ~~cold, sunny, and windy days covered over Ishinomaki region, and dense dust containing tsunami~~  
7 ~~sediment floated in the air for the following three weeks.~~

8 Although asthma was also one of the most common chronic respiratory diseases and had the  
9 same precipitating cause with COPD, attack of asthma was not so much increased as AE-COPD.  
10 This difference might be caused by two important differences between asthma and COPD. First,  
11 generally, patients of COPD were older than those of asthma. Therefore, baseline health  
12 condition of patients of COPD would be poorer than that of asthma<sup>21</sup>. As a result, COPD  
13 patients required more frequent hospitalization. In our study, mean age of AE-COPD was higher  
14 than that of attack of asthma as well. Second, bacterial respiratory infection affects patients with  
15 COPD more than those with asthma<sup>22</sup>. In the aftermath of earthquake, loss of hygiene and  
16 overcrowding in the shelter could increase the risk of respiratory bacterial infection and cause  
17 AE-COPD.

18 ~~Hospitalization for lung~~ Lung cancer related ~~symptoms~~ hospitalization did not increase much and  
19 its ratio to total hospitalization for respiratory diseases rather declined. Mean age of lung cancer  
20 patients was similar to that in the past two years. Maeda et al. also reported that no increase in  
21 lung cancer related hospitalization was observed after Hanshin-Awaji earthquake<sup>23</sup>. Progression  
22 of lung cancer may not be influenced by environment as much as cancer growth itself. So, the  
23 disaster will not impact on lung cancer immediately. Although the interruption of chemotherapy  
24 and/or radiotherapy would worsen the prognosis, it cannot be confirmed during our study  
25 period.

#### 26 27 **Effect on ADL**

28 ~~Our observation demonstrated that drastic deterioration of ADL after the disaster resulted in~~  
29 ~~increase in hospitalization by respiratory diseases.~~ In acute phase, patients with poor ADL,  
30 especially ~~those~~ originally dependent ~~ones~~, were hospitalized for pulmonary diseases, typically  
31 pneumonia; although substantial number of good ADL patients was also hospitalized. After 3 ~~or~~  
32 4 weeks, ~~there was a sharp increase in newly dependent people~~ many people who deteriorated  
33 their ADL ~~after the disaster~~ (newly dependent) ~~were hospitalized for pulmonary diseases.~~ It was  
34 reported that physical disability was an independent risk factor for death in Hanshin-Awaji  
35 earthquake and the 1999 Taiwan earthquake<sup>9 10</sup>. However, those reports investigated the  
36 mortality in acute phase, not hospitalization in subacute or chronic phase. After the earthquake

1  
2  
3  
4  
5  
6  
7  
8  
9  
10  
11  
12  
13  
14  
15  
16  
17  
18  
19  
20  
21  
22  
23  
24  
25  
26  
27  
28  
29  
30  
31  
32  
33  
34  
35  
36  
37  
38  
39  
40  
41  
42  
43  
44  
45  
46  
47  
48  
49  
50  
51  
52  
53  
54  
55  
56  
57  
58  
59  
60

1 and tsunami, one fourth of people in Ishinomaki region fled into shelters, many of which were  
2 also flooded by tsunami. They lacked water and food under harsh condition of cold season  
3 without heating in overcrowded ~~room~~quarter just letting them lie on the floor without beds. In  
4 such bad conditions, elderly people were restricted their consumption food and water, and kept  
5 still in ~~one~~ small space; ~~as a result, they deteriorated their~~resulting in deterioration of ADLs. In  
6 addition, scarcity of water worsened oral hygiene. Both poor functional status and ~~loss of~~ oral  
7 hygiene were the major risk factor of pneumonia<sup>24-27</sup>, especially in elderly people.  
8 Subsequently, many elderly people were hospitalized for “shelter pneumonia” after the  
9 earthquake. Also, poor oral hygiene induces swallowing dysfunction<sup>28</sup> and swallowing  
10 dysfunction could be a risk factor of exacerbation of COPD<sup>29</sup>. It would be one of the reasons  
11 why AE-COPD increased especially in elderly people.

### 12 13 **Effect on aging society**

14 According to the report of government of Japan, 93% of the fatalities were drowning and more  
15 than 60% of them were ~~over~~ 60 years old ~~or more~~ in the Great East Japan earthquake. Although  
16 it was reported by many previous reports that elderly people had a greater risk of death after the  
17 earthquake, the proportion of ~~the~~ elderly ~~people killed by this earthquake and tsunami~~ was  
18 extremely high in comparison to other major earthquake or tsunami in the world<sup>4-8</sup>. Similar  
19 finding was reported only in 1995 Hanshin-Awaji earthquake and 2004 Mid Niigata earthquake  
20 in Japan<sup>12 17</sup>. Moreover, 90.8% of the patients hospitalized for respiratory disease after the  
21 earthquake were ~~over~~ 60 years old ~~or more~~ in our study. These results suggested that elderly  
22 people were vulnerable not only immediately after the earthquake but also for a while after the  
23 earthquake.

24 In 1999 Taiwan earthquake, 2003 heat waves in the Czech Republic, and 2004  
25 Sumatra-Andaman earthquake, it is demonstrated that these disasters has left decreased  
26 mortality in the stricken area, resulted from a large number of direct death by disasters among a  
27 vulnerable population such as elderly people or children<sup>5 30 31</sup>, called “harvesting effect”.  
28 However, our observation suggests that, in the aging society, a huge disaster not only directly  
29 kills the vulnerable people but also ~~newly~~produces ~~new~~ vulnerable people. Previous reports  
30 demonstrated that prolonged harmful influence on mental health and psychological slow  
31 recovery were seen more frequently in the elderly people than young people<sup>32-35</sup>. Therefore, we  
32 should pay a long-term attention on those elderly people after a disaster.

### 33 34 **Implications for policy and practice**

35 Our observation suggests two important targets for reducing hospitalization for respiratory  
36 disease after the major disaster in aging society. One target is interruption of treatment for



1 chronic respiratory disease and the other target is deterioration of ADL. Interruption of  
2 treatment for chronic respiratory disease was preventable by storing the drugs for a few days.  
3 However, it is necessary ~~to establish the system offer~~ valid storage to grasp regional prescription  
4 data of each drug and patient's personal medication data. Telemedicine system or web-based  
5 patient data storage system might be useful. Prevention of deterioration of ADL is also  
6 important. Elderly people ~~are~~ potentially vulnerable and easily deteriorate their ADL. In our  
7 study, remaining at shelters in stricken area for more than three weeks led increase in  
8 deterioration of ADL and hospitalization for respiratory diseases. Therefore, we propose to  
9 ~~transfer/evacuate~~ elderly people ~~to~~ out of the stricken area as soon as possible.

### 11 Strengths and weaknesses of study

12 Our study had two important strengths. First, the Great East Japan Earthquake hit one of the  
13 most ~~advanced~~ rapidly aging societies in the world<sup>3</sup>. As the proportion of elderly people  
14 continues to increase in not only developed ~~countries~~ but also developing countries, there is an  
15 urgent need of information and analysis on the aging society to plan countermeasures against it.  
16 Our study will give lessons against natural disaster to all the countries. Secondly, we obtained  
17 detailed data of patient's demographics, diagnosis, and ADL in a catastrophic situation. It is  
18 because that our hospital has kept its medical function, including electronic medical record  
19 system or laboratory systems, while devastating earthquake and tsunami hit Ishinomaki city and  
20 almost all medical facilities lost their function, and that staffs in our hospital has trained for the  
21 coming earthquake and has had an strong motivation to record ~~our experiences as memos or on~~  
22 ~~digital recorders for future~~ disaster medicine ~~for the future~~.

23 Our study is single center study. This might be weakness of our study, but our hospital was the  
24 only functional hospital after the earthquake in Ishinomaki medical zone which account for  
25 more than 30% of ~~total fatalities~~ victims of this earthquake ~~in Japan~~. Also, it has been the only  
26 hospital which has the department of respiratory medicine and pulmonary specialists in the  
27 medical zone. Even in the ordinary time ~~before the disaster~~, it accepted almost all of the serious  
28 patients with pulmonary diseases who needed hospitalization. Therefore, we think our study  
29 well represents impact of the earthquake on pulmonary diseases ~~and describes what happened~~  
30 ~~in the hospital which faced the earthquake at the front~~<sup>2</sup>. It is also weakness of our study that we  
31 analyzed only hospitalized patients. There were a great number of outpatients and a heavy loss  
32 of lives. These events will be analyzed in the future report. Another weakness of our study is  
33 that cross-sectional study cannot elucidate a causal relationship. Finally, we did not clearly  
34 define the condition of hospitalization. Because the destruction of ordinary healthcare system  
35 and poor hygiene outside the hospital, we hospitalized some patients who could be treated in  
36 outpatient setting in ordinary time. However, this was a real situation after devastating disaster.

## Conclusion

The Great East Japan earthquake and following tsunami hit the one of the most **advancedrapidly** aging society in the world. After the disaster, pneumonia, exacerbation of COPD, bronchial asthma attack associated with bad ADL in **the** elderly provoked the most part of **increase in** hospitalization for pulmonary diseases. These observations should be exploited in constructing emergency medical management for disasters in progressive **advancedrapidly** aging society.

## Acknowledgement

We would like to express our gratitude to all **of** the **relief** teams and volunteers from **all** area of Japan and foreign countries for **their** kind and warm supports. We also thank doctors, nurses, and other employees in Japanese Red Cross Ishinomaki Hospital.

**Competing interests:** None declared.

**Ethical approval:** Approval of ethical review committee of Japanese Red Cross Ishinomaki Hospital was obtained.

**Contributors:** SY was responsible for study design and interpretation of the data, and drafted the manuscript. MH, SK, HS, ST, and MY were responsible for collection and interpretation of the data. KN drafted the statistical analysis part in the manuscript, and provided suggestions on public health and epidemiology. MH, SK and MY were responsible for study design and revised the drafted manuscript. SY, MH, SK, HS, ST and MY treated the patients. All authors approved the final version of the manuscript.

**Data sharing statement:** There is no additional data available.

**Funding:** This study was not funded by any research funds.

## References

1. McCurry J. Japan: the aftermath. *Lancet* 2011;**377**:1061-1062.
2. National Police Agency. *Dmage Situation and Police Countermeasure*. [www.npa.go.jp/archive/keibi/biki/index\\_e.htm](http://www.npa.go.jp/archive/keibi/biki/index_e.htm) (accessed 29 Dec 2011).
3. Tamiya N, Noguchi H, Nishi A, *et al*. Population ageing and wellbeing: lessons from Japan's long-term care insurance policy. *Lancet* 2011;**378**:1183-1192.
4. Liang NJ, Shih YT, Shih FY, *et al*. Disaster epidemiology and medical response in the Chi-Chi earthquake in Taiwan. *Ann Emerg Med* 2001;**38**:549-555.
5. Chan CC, Lin YP, Chen HH, *et al*. A population-based study on the immediate and prolonged effects of the 1999 Taiwan earthquake on mortality. *Ann Epidemiol* 2003;**13**:502-508.
6. Nishikiori N, Abe T, Costa DG, *et al*. Who died as a result of the tsunami? Risk factors of mortality among internally displaced persons in Sri Lanka: a retrospective cohort analysis. *BMC*

- 1  
2  
3  
4  
5  
6  
7  
8  
9  
10  
11  
12  
13  
14  
15  
16  
17  
18  
19  
20  
21  
22  
23  
24  
25  
26  
27  
28  
29  
30  
31  
32  
33  
34  
35  
36  
37  
38  
39  
40  
41  
42  
43  
44  
45  
46  
47  
48  
49  
50  
51  
52  
53  
54
- 1 *Public Health* 2006;**6**:73.
- 2 7. Rofi A, Doocy S, Robinson C. Tsunami mortality and displacement in Aceh province,  
3 Indonesia. *Disasters* 2006;**30**:340-350.
- 4 8. Doocy S, Rofi A, Moodie C, *et al*. Tsunami mortality in Aceh Province, Indonesia. *Bull*  
5 *World Health Organ* 2007;**85**:273-278.
- 6 9. Chou YJ, Huang N, Lee CH, *et al*. Who is at risk of death in an earthquake? *Am J Epidemiol*  
7 2004;**160**:688-695.
- 8 10. Osaki Y, Minowa M. Factors associated with earthquake deaths in the great Hanshin-Awaji  
9 earthquake, 1995. *Am J Epidemiol* 2001;**153**:153-156.
- 10 11. Takakura R, Himeno S, Kanayama Y, *et al*. Follow-up after the Hanshin-Awaji earthquake:  
11 diverse influences on pneumonia, bronchial asthma, peptic ulcer and diabetes mellitus. *Intern*  
12 *Med* 1997;**36**:87-91.
- 13 12. Tanaka H, Oda J, Iwai A, *et al*. Morbidity and mortality of hospitalized patients after the  
14 1995 Hanshin-Awaji earthquake. *Am J Emerg Med* 1999;**17**:186-191.
- 15 13. Matsuoka T, Yoshioka T, Oda J, *et al*. The impact of a catastrophic earthquake on morbidity  
16 rates for various illnesses. *Public Health* 2000;**114**:249-253.
- 17 14. Guha-Sapir D, van Panhuis WG. Health impact of the 2004 Andaman Nicobar earthquake  
18 and tsunami in Indonesia. *Prehosp Disaster Med* 2009;**24**:493-499.
- 19 15. Chierakul W, Winothai W, Wattanawaitunechai C, *et al*. Melioidosis in 6 tsunami survivors  
20 in southern Thailand. *Clin Infect Dis* 2005;**41**:982-990.
- 21 16. Potera C. In disaster's wake: tsunami lung. *Environ Health Perspect* 2005;**113**:A734.
- 22 17. Tanida N. What happened to elderly people in the great Hanshin earthquake. *BMJ*  
23 1996;**313**:1133-1135.
- 24 18. Guha-Sapir D, van Panhuis WG, Lagoutte J. Short communication: patterns of chronic and  
25 acute diseases after natural disasters - a study from the International Committee of the Red  
26 Cross field hospital in Banda Aceh after the 2004 Indian Ocean tsunami. *Trop Med Int Health*  
27 2007;**12**:1338-1341.
- 28 19. Miller AC, Arquilla B. Chronic diseases and natural hazards: impact of disasters on diabetic,  
29 renal, and cardiac patients. *Prehosp Disaster Med* 2008;**23**:185-194.
- 30 20. Tomita K, Hasegawa Y, Watanabe M, *et al*. The Totton-Ken Seibu earthquake and  
31 exacerbation of asthma in adults. *J Med Invest* 2005;**52**:80-84.
- 32 21. Soriano JB, Davis KJ, Coleman B, *et al*. The proportional Venn diagram of obstructive lung  
33 disease: two approximations from the United States and the United Kingdom. *Chest*  
34 2003;**124**:474-481.
- 35 22. Pauwels RA. Similarities and differences in asthma and chronic obstructive pulmonary  
36 disease exacerbations. *Proc Am Thorac Soc* 2004;**1**:73-76.

- 1  
2  
3  
4  
5  
6  
7  
8 1 23. Maeda H, Nakagawa M, Yokoyama M. Hospital admissions for respiratory diseases in the  
9 2 aftermath of the great Hanshin earthquake[Article in Japanese]. *Nihon Kyobu Shikkan Gakkai*  
10 3 *Zasshi* 1996;**34**:164-173.  
11 4 24. El-Solh AA, Pietrantonio C, Bhat A, *et al.* Microbiology of severe aspiration pneumonia in  
12 5 institutionalized elderly. *Am J Respir Crit Care Med* 2003;**167**:1650-1654.  
13 6 25. Loeb MB, Becker M, Eady A, Walker-Dilks C. Interventions to prevent aspiration  
14 7 pneumonia in older adults: a systematic review. *J Am Geriatr Soc* 2003;**51**:1018-1022.  
15 8 26. Langmore SE, Skarupski KA, Park PS, *et al.* Predictors of aspiration pneumonia in nursing  
16 9 home residents. *Dysphagia* 2002;**17**:298-307.  
17 10 27. Terpenning MS, Taylor GW, Lopatin DE, *et al.* Aspiration pneumonia: dental and oral risk  
18 11 factors in an older veteran population. *J Am Geriatr Soc* 2001;**49**:557-563.  
19 12 28. Yoshino A, Ebihara T, Ebihara S, *et al.* Daily oral care and risk factors for pneumonia  
20 13 among elderly nursing home patients. *JAMA* 2001;**286**:2235-2236.  
21 14 29. Kobayashi S, Kubo H, Yanai M. Impairment of swallowing in COPD. *Am J Respir Crit*  
22 15 *Care Med* 2009;**180**:481.  
23 16 30. Nishikiori N, Abe T, Costa DG, *et al.* Timing of mortality among internally displaced  
24 17 persons due to the tsunami in Sri Lanka: cross sectional household survey. *BMJ*  
25 18 2006;**332**:334-335.  
26 19 31. Kysely J, Kriz B. Decreased impacts of the 2003 heat waves on mortality in the Czech  
27 20 Republic: an improved response? *Int J Biometeorol* 2008;**52**:733-745.  
28 21 32. Toyabe S, Shioiri T, Kuwabara H, *et al.* Impaired psychological recovery in the elderly after  
29 22 the Niigata-Chuetsu Earthquake in Japan:a population-based study. *BMC Public Health*  
30 23 2006;**6**:230.  
31 24 33. Seplaki CL, Goldman N, Weinstein M, *et al.* Before and after the 1999 Chi-Chi earthquake:  
32 25 traumatic events and depressive symptoms in an older population. *Soc Sci Med*  
33 26 2006;**62**:3121-3132.  
34 27 34. Ueki A, Morita Y, Miyoshi K. Changes in symptoms after the great Hanshin Earthquake in  
35 28 patients with dementia[Article in Japanese]. *Nihon Ronen Igakkai Zasshi* 1996;**33**:573-579.  
36 29 35. Maeda K, Kakigi T. Manifestation of the symptoms in demented patients after the Great  
37 30 Hanshin Earthquake in Japan[Article in Japanese]. *Seishin Shinkeigaku Zasshi*  
38 31 1996;**98**:320-328.  
39 32  
40 33  
41 34  
42 35  
43 36  
44  
45  
46  
47  
48  
49  
50  
51  
52  
53  
54  
55  
56  
57  
58  
59  
60

1  
2  
3  
4  
5  
6  
7  
8  
9  
10  
11  
12  
13  
14  
15  
16  
17  
18  
19  
20  
21  
22  
23  
24  
25  
26  
27  
28  
29  
30  
31  
32  
33  
34  
35  
36  
37  
38  
39  
40  
41  
42  
43  
44  
45  
46  
47  
48  
49  
50  
51  
52  
53  
54  
55  
56  
57  
58  
59  
60

For peer review only

**Tables**

~~Table 1. Demographics and patient characteristics in 2011 and past two years.~~

|                  | After the earthquake (2011)<br>n=322 | Past two years (2010 and 2011)<br>n=204 | p-value |
|------------------|--------------------------------------|-----------------------------------------|---------|
| <b>All-cause</b> |                                      |                                         |         |
| age (year)       | 75.7±12.5*                           | 73.2±13.4                               | 0.03    |
| male             | 192 (59.6)                           | 137 (67.2)                              | 0.08    |
| <b>Pneumonia</b> |                                      |                                         |         |
| age              | 77.6±11.8*                           | 74.3±12.8                               | 0.03    |
| male             | 111 (58.4)                           | 63 (66.3)                               | 0.20    |
| <b>AE-COPD</b>   |                                      |                                         |         |
| age              | 76.0±8.7*                            | 69.3±15.9                               | 0.03    |
| male             | 43 (81.1)*                           | 8 (50.0)                                | 0.01    |
| <b>Asthma</b>    |                                      |                                         |         |

- Formatted: Justified
- Formatted: Justified, Tab stops: Not at 2.95" + 5.91"
- Formatted: Justified, Tab stops: Not at 2.95" + 5.91"
- Formatted: Justified
- Formatted: Justified, Indent: First line: 0 ch
- Formatted: Justified
- Formatted: Justified, Indent: First line: 0 ch
- Formatted: Justified
- Formatted: Justified
- Formatted: Justified, Indent: First line: 0 ch
- Formatted: Justified
- Formatted: Justified
- Formatted: Justified, Indent: First line: 0 ch
- Formatted: Justified
- Formatted: Justified, Indent: First line: 0 ch
- Formatted: Justified
- Formatted: Justified

1  
2  
3  
4  
5  
6  
7  
8  
9  
10  
11  
12  
13  
14  
15  
16  
17  
18  
19  
20  
21  
22  
23  
24  
25  
26  
27  
28  
29  
30  
31  
32  
33  
34  
35  
36  
37  
38  
39  
40  
41  
42  
43  
44  
45  
46  
47  
48  
49  
50  
51  
52  
53  
54  
55  
56  
57  
58  
59  
60

|                    |           |           |      |
|--------------------|-----------|-----------|------|
| age                | 68.7±19.7 | 67.2±19.4 | 0.83 |
| male               | 5 (18.5)* | 6 (54.6)  | 0.03 |
| <b>Lung cancer</b> |           |           |      |
| age                | 74.3±12.1 | 73.2±16.0 | 0.79 |
| male               | 16 (72.7) | 18 (66.7) | 0.65 |
| <b>Others</b>      |           |           |      |
| age                | 70.4±11.6 | 73.8±11.3 | 0.19 |
| male               | 17 (56.7) | 42 (76.4) | 0.06 |

AE-COPD, acute exacerbation of COPD.

Data are mean±SD for numerical variables and number (%) for categorical variables. \*p<0.05.

Table 2. Association of age and sex with hospitalization for respiratory disease after the earthquake.

|                           | Hospitalization for respiratory disease after the earthquake |                       |
|---------------------------|--------------------------------------------------------------|-----------------------|
|                           | Unadjusted OR (95% CI)                                       | *Adjusted OR (95% CI) |
| <b>All cause</b>          |                                                              |                       |
| —age (year)               | 1.01† (1.00-1.03)                                            | 1.02† (1.00-1.03)     |
| —male (reference: female) | 0.72 (0.50-1.04)                                             | 0.71 (0.19-1.03)      |
| <b>Pneumonia</b>          |                                                              |                       |
| —age                      | 1.02† (1.00-1.04)                                            | 1.02† (1.00-1.04)     |
| —male                     | 0.71 (0.42-1.19)                                             | 0.74 (0.44-1.23)      |
| <b>AE-COPD</b>            |                                                              |                       |
| —age                      | 1.05† (1.00-1.11)                                            | 1.05 (1.00-1.11)      |
| —male                     | 4.30† (1.30-14.66)                                           | 4.17 † (1.21-14.84)   |
| <b>Asthma</b>             |                                                              |                       |
| —age                      | 1.00 (0.97-1.04)                                             | 1.00 (0.96-1.05)      |

Formatted: Justified, Indent: First line: 0 ch

Formatted: Justified

Formatted: Justified, Tab stops: Not at 2.95" + 5.91"

Formatted: Justified, Indent: First line: 0 ch, Tab stops: Not at 2.95" + 5.91"

Formatted: Justified, Tab stops: Not at 2.95" + 5.91"

Formatted: Justified, Tab stops: Not at 2.95" + 5.91"

Formatted: Justified

Formatted: Justified, Indent: First line: 0 ch

Formatted: Justified

Formatted: Justified, Indent: First line: 0 ch

Formatted: Justified

Formatted: Justified

Formatted: Justified, Indent: First line: 0 ch

Formatted: Justified

Formatted: Justified, Indent: First line: 0 ch

Formatted: Justified

|                    |                    |                    |
|--------------------|--------------------|--------------------|
| —male              | 0.19 † (0.04-0.85) | 0.19 † (0.04-0.85) |
| <b>Lung cancer</b> |                    |                    |
| —age               | 1.01 (0.97-1.05)   | 1.00 (0.96-1.05)   |
| —male              | 1.33 (0.39-4.76)   | 1.30 (0.37-4.83)   |
| <b>Others</b>      |                    |                    |
| —age               | 0.97 (0.94-1.01)   | 0.97 (0.93-1.01)   |
| —male              | 0.40 (0.15-1.05)   | 0.39 (0.15-1.03)   |

AE-COPD, acute exacerbation of COPD; OR, odds ratio; CI, confidence interval.

\*Adjusted for age and sex with each other. †p<0.05

Table 13. Association of ADL with patient's characteristics and respiratory disease.

|             | Independent<br>n=70 | Newly<br>dependent<br>n=104 | Originally<br>dependent<br>n=137 |
|-------------|---------------------|-----------------------------|----------------------------------|
| Age         | 69.9±15.1           | 73.1±11.2                   | 80.3±10.5                        |
| Male        | 49 (70.0)           | 63 (60.6)                   | 69 (50.4)                        |
| Diagnosis   |                     |                             |                                  |
| Pneumonia   | 31 (44.3)           | 59 (56.7)                   | 94 (68.6)                        |
| AE-COPD     | 17 (24.3)           | 17 (16.4)                   | 15 (11.0)                        |
| Asthma      | 11 (15.7)           | 11 (10.6)                   | 5 (3.7)                          |
| Lung cancer | 3 (4.3)             | 6 (5.8)                     | 12 (8.8)                         |
| Others      | 8 (11.4)            | 11 (8.0)                    | 11 (8.0)                         |

AE-COPD, acute exacerbation of COPD.

Data are mean ±SD for numerical variables and number (%) for categorical variables.

1  
2  
3  
4  
5  
6  
7  
8  
9  
10  
11  
12  
13  
14  
15  
16  
17  
18  
19  
20  
21  
22  
23  
24  
25  
26  
27  
28  
29  
30  
31  
32  
33  
34  
35  
36  
37  
38  
39  
40  
41  
42  
43  
44  
45  
46  
47  
48  
49  
50  
51  
52  
53  
54  
55  
56  
57  
58  
59  
60

1  
2  
3  
4  
5  
6  
7  
8  
9  
10  
11  
12  
13  
14  
15  
16  
17  
18  
19  
20  
21  
22  
23  
24  
25  
26  
27  
28  
29  
30  
31  
32  
33  
34  
35  
36  
37  
38  
39  
40  
41  
42  
43  
44  
45  
46  
47  
48  
49  
50  
51  
52  
53  
54  
55  
56  
57  
58  
59  
60

**Figure legends**

Figure 1. ~~The number of unscheduled new hospitalizations~~Sequential change of the number of unscheduled hospitalization for all causes (A) and for respiratory disease (B) from March 11 to May 9 in 2009~~11~~, 2010 and 2011, presented in 10 day bins~~09~~.

Figure 2. The number and proportion of patients hospitalized for respiratory disease pooled from March 11 to May 9 in 2009~~11~~, 2010, and 2011~~09~~.

Figure 3. ~~Distribution~~Sequential change of ~~disease distribution of~~ patients hospitalized for respiratory disease after the Great East Japan earthquake from March 11 to May 9 in 2011, presented in 10 day bins.

Figure 4. ~~Influence of the earthquake on the patient's ADL~~Influence of the disaster on ADL status and its deterioration in hospitalized patients for respiratory disease from March 11 to May 9 in 2011, presented in 10 day bins.



1  
2  
3  
4  
5  
6  
7  
8  
9  
10  
11  
12  
13  
14  
15  
16  
17  
18  
19  
20  
21  
22  
23  
24  
25  
26  
27  
28  
29  
30  
31  
32  
33  
34  
35  
36  
37  
38  
39  
40  
41  
42  
43  
44  
45  
46  
47  
48  
49  
50  
51  
52  
53  
54  
55  
56  
57  
58  
59  
60

1  
2  
3

For peer review only



1  
2  
3  
4  
5  
6  
7  
8  
9  
10  
11  
12  
13  
14  
15  
16  
17  
18  
19  
20  
21  
22  
23  
24  
25  
26  
27  
28  
29  
30  
31  
32  
33  
34  
35  
36  
37  
38  
39  
40  
41  
42  
43  
44  
45  
46  
47  
48  
49  
50  
51  
52  
53  
54  
55  
56  
57  
58  
59  
60

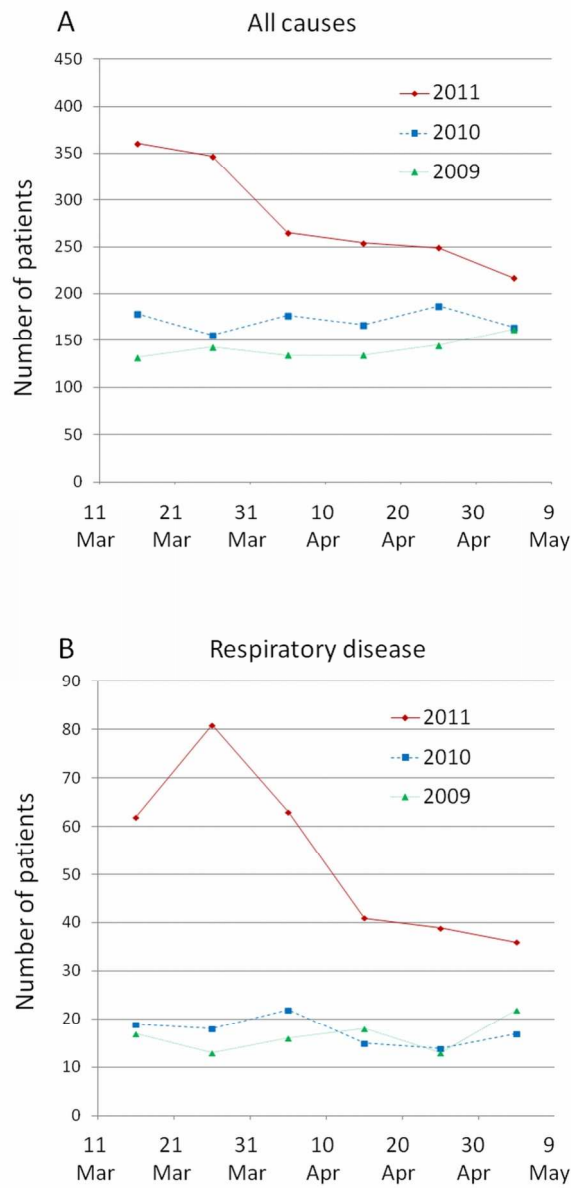

Figure 1. The number of unscheduled new hospitalizations for all causes (A) and for respiratory disease (B) from March 11 to May 9 in 2009, 2010 and 2011, presented in 10 day bins.  
90x184mm (300 x 300 DPI)

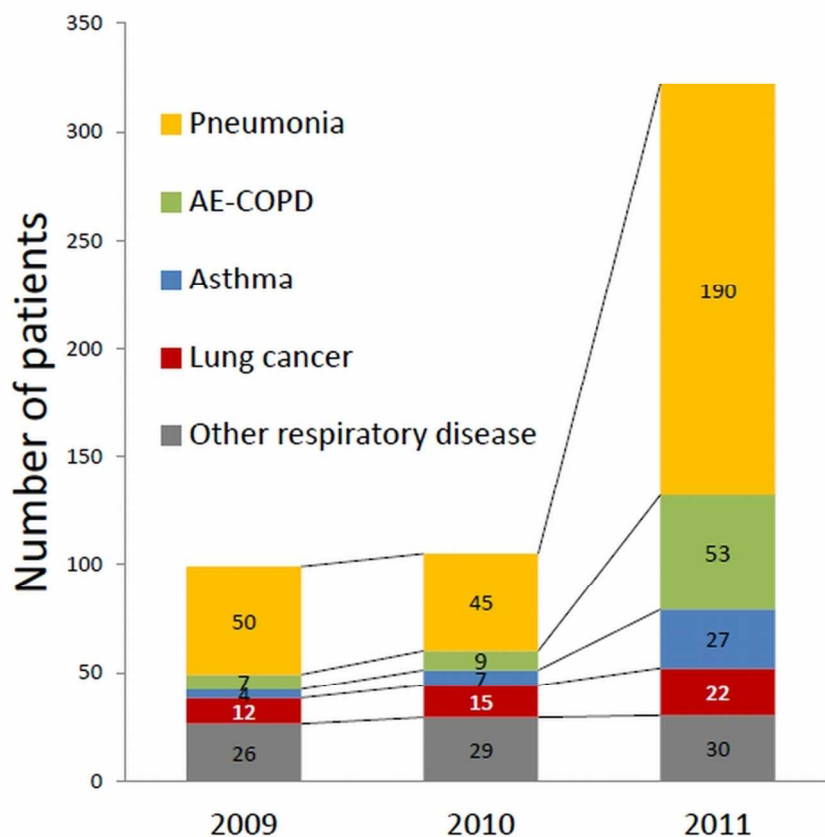

Figure 2. The number and proportion of patients hospitalized for respiratory disease pooled from March 11 to May 9 in 2009, 2010, and 2011.  
99x90mm (300 x 300 DPI)

only

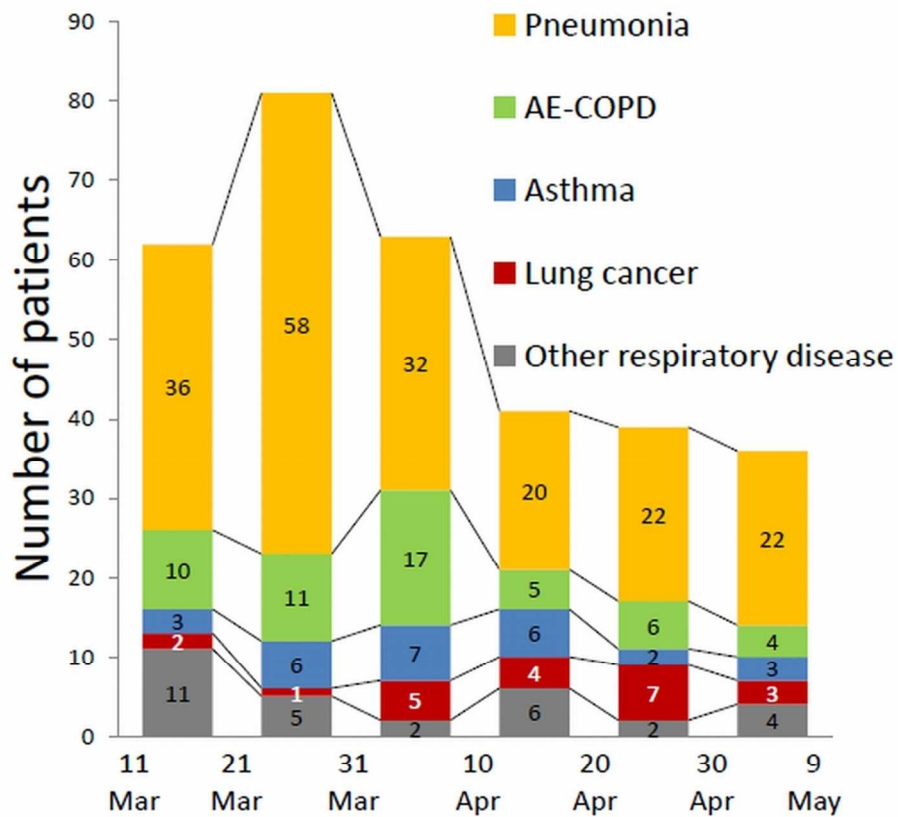

Figure 3. Distribution of patients hospitalized for respiratory disease after the Great East Japan earthquake from March 11 to May 9 in 2011, presented in 10 day bins.  
99x90mm (300 x 300 DPI)

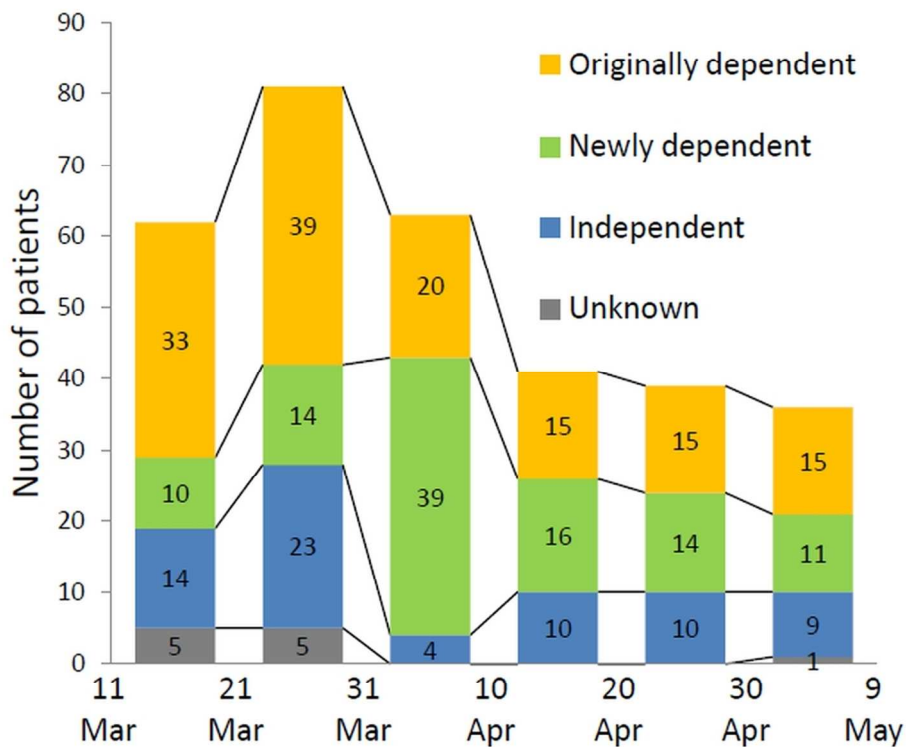

Figure 4. Influence of the disaster on ADL status and its deterioration in hospitalized patients for respiratory disease from March 11 to May 9 in 2011, presented in 10 day bins.  
108x90mm (300 x 300 DPI)

STROBE 2007 (v4) Statement—Checklist of items that should be included in reports of cross-sectional studies

| Section/Topic             | Item # | Recommendation                                                                                                                                                                       | Reported on page # |
|---------------------------|--------|--------------------------------------------------------------------------------------------------------------------------------------------------------------------------------------|--------------------|
| Title and abstract        | 1      | (a) Indicate the study’s design with a commonly used term in the title or the abstract                                                                                               | 1                  |
|                           |        | (b) Provide in the abstract an informative and balanced summary of what was done and what was found                                                                                  | 2, 3               |
| <b>Introduction</b>       |        |                                                                                                                                                                                      |                    |
| Background/rationale      | 2      | Explain the scientific background and rationale for the investigation being reported                                                                                                 | 3-4                |
| Objectives                | 3      | State specific objectives, including any prespecified hypotheses                                                                                                                     | 3-4                |
| <b>Methods</b>            |        |                                                                                                                                                                                      |                    |
| Study design              | 4      | Present key elements of study design early in the paper                                                                                                                              | 4-6                |
| Setting                   | 5      | Describe the setting, locations, and relevant dates, including periods of recruitment, exposure, follow-up, and data collection                                                      | 4-6                |
| Participants              | 6      | (a) Give the eligibility criteria, and the sources and methods of selection of participants                                                                                          | 4-6                |
| Variables                 | 7      | Clearly define all outcomes, exposures, predictors, potential confounders, and effect modifiers. Give diagnostic criteria, if applicable                                             | 4-6                |
| Data sources/ measurement | 8*     | For each variable of interest, give sources of data and details of methods of assessment (measurement). Describe comparability of assessment methods if there is more than one group | 4-6                |
| Bias                      | 9      | Describe any efforts to address potential sources of bias                                                                                                                            | -                  |
| Study size                | 10     | Explain how the study size was arrived at                                                                                                                                            | 4                  |
| Quantitative variables    | 11     | Explain how quantitative variables were handled in the analyses. If applicable, describe which groupings were chosen and why                                                         | 4, 5               |
| Statistical methods       | 12     | (a) Describe all statistical methods, including those used to control for confounding                                                                                                | 5, 6               |
|                           |        | (b) Describe any methods used to examine subgroups and interactions                                                                                                                  | -                  |
|                           |        | (c) Explain how missing data were addressed                                                                                                                                          | 7                  |
|                           |        | (d) If applicable, describe analytical methods taking account of sampling strategy                                                                                                   | -                  |
|                           |        | (e) Describe any sensitivity analyses                                                                                                                                                | -                  |
| <b>Results</b>            |        |                                                                                                                                                                                      |                    |

|                          |     |                                                                                                                                                                                                              |               |
|--------------------------|-----|--------------------------------------------------------------------------------------------------------------------------------------------------------------------------------------------------------------|---------------|
| Participants             | 13* | (a) Report numbers of individuals at each stage of study—eg numbers potentially eligible, examined for eligibility, confirmed eligible, included in the study, completing follow-up, and analysed            | 6             |
|                          |     | (b) Give reasons for non-participation at each stage                                                                                                                                                         | -             |
|                          |     | (c) Consider use of a flow diagram                                                                                                                                                                           | -             |
| Descriptive data         | 14* | (a) Give characteristics of study participants (eg demographic, clinical, social) and information on exposures and potential confounders                                                                     | 6-7 + Table 1 |
|                          |     | (b) Indicate number of participants with missing data for each variable of interest                                                                                                                          | 7             |
| Outcome data             | 15* | Report numbers of outcome events or summary measures                                                                                                                                                         | 3             |
| Main results             | 16  | (a) Give unadjusted estimates and, if applicable, confounder-adjusted estimates and their precision (eg, 95% confidence interval). Make clear which confounders were adjusted for and why they were included | 3 + Table 2   |
|                          |     | (b) Report category boundaries when continuous variables were categorized                                                                                                                                    | 5             |
|                          |     | (c) If relevant, consider translating estimates of relative risk into absolute risk for a meaningful time period                                                                                             | -             |
| Other analyses           | 17  | Report other analyses done—eg analyses of subgroups and interactions, and sensitivity analyses                                                                                                               | -             |
| <b>Discussion</b>        |     |                                                                                                                                                                                                              |               |
| Key results              | 18  | Summarise key results with reference to study objectives                                                                                                                                                     | 8             |
| Limitations              | 19  | Discuss limitations of the study, taking into account sources of potential bias or imprecision. Discuss both direction and magnitude of any potential bias                                                   | 11            |
| Interpretation           | 20  | Give a cautious overall interpretation of results considering objectives, limitations, multiplicity of analyses, results from similar studies, and other relevant evidence                                   | 8, 10-11      |
| Generalisability         | 21  | Discuss the generalisability (external validity) of the study results                                                                                                                                        | 10-11         |
| <b>Other information</b> |     |                                                                                                                                                                                                              |               |
| Funding                  | 22  | Give the source of funding and the role of the funders for the present study and, if applicable, for the original study on which the present article is based                                                | 12            |

\*Give information separately for cases and controls in case-control studies and, if applicable, for exposed and unexposed groups in cohort and cross-sectional studies.

**Note:** An Explanation and Elaboration article discusses each checklist item and gives methodological background and published examples of transparent reporting. The STROBE checklist is best used in conjunction with this article (freely available on the Web sites of PLoS Medicine at <http://www.plosmedicine.org/>, Annals of Internal Medicine at <http://www.annals.org/>, and Epidemiology at <http://www.epidem.com/>). Information on the STROBE Initiative is available at [www.strobe-statement.org](http://www.strobe-statement.org).
